# Supplementary material for: Total synthesis of atropisomeric indolosesquiterpenoids via N–N bond formation: dixiamycins A and B
Source: Royal Society of Chemistry journal article supplement (doi:10.1039/d2sc07119c), 2023-01-01
Supplement: d2sc07119c1.pdf [file d2sc07119c1.pdf]

Supplemental material for:

## Total Synthesis of Atropisomeric Indolosesquiterpenoids by N–N Bond Formation: Dixiamycins A and B

Rhituparna Nandi,<sup>a‡</sup> Sovan Niyogi,<sup>b‡</sup> Sourav Kundu,<sup>a‡</sup> Vipin R. Gavit,<sup>a</sup> Mintu Munda,<sup>a</sup> Ranjit Murmu,<sup>b</sup> and Alakesh Bisai<sup>\*a,b</sup>

<sup>a</sup>Department of Chemistry, Indian Institute of Science Education and Research Bhopal, Bhopal Bypass Road, Bhopal, MP - 462 066, India.

<sup>b</sup>Department of Chemical Sciences, Indian Institute of Science Education and Research Kolkata, Mohanpur, Nadia, WB - 741 246, India.

*e-Mail: [alakesh@iiserkol.ac.in](mailto:alakesh@iiserkol.ac.in), [alakeshb@gmail.com](mailto:alakeshb@gmail.com)*

<sup>‡</sup>*These authors contributed equally to this work.*

### Table of Contents

|                                                                                                   |           |
|---------------------------------------------------------------------------------------------------|-----------|
| Materials and Methods                                                                             | S2        |
| Cu-catalyzed Csp <sup>3</sup> -Csp <sup>3</sup> bond formation                                    | S3-S4     |
| Synthesis of allyl alcohol <b>13</b>                                                              | S4-S5     |
| Synthesis of enantioselective epoxy-alcohol (–)- <b>14</b>                                        | S5-S7     |
| Total Synthesis of 4- <i>epi</i> -Tryptobenzene L [(+)- <b>4</b> ]                                | S7-S12    |
| Synthesis of (+)- <b>9</b> , (+)- <b>8</b> , (+)- <b>15</b> , (+)- <b>16</b> and (+)- <b>6</b>    | S13-S20   |
| Synthesis of (+)- <b>20</b> , (+)- <b>19</b> , (+)- <b>18</b> , (+)- <b>17</b> and (+)- <b>21</b> | S21-S27   |
| Total Synthesis of (+)-Xiamycin A methylester [(+)- <b>2b</b> ]                                   | S28-S32   |
| Total Synthesis of (+)-Xiamycin A [(+)- <b>2a</b> ]                                               | S32-S37   |
| Synthesis of Xiamycin A methylester TMS ether (+)- <b>22</b>                                      | S37-S38   |
| Cu(I)-Catalyzed N–N Bond Formation [Synthesis of (+)- <b>23a</b> and (+)- <b>23b</b> ]            | S39-S41   |
| Synthesis of (+)-Dixiamycin A methyl ester ( <b>24a</b> )                                         | S41-S42   |
| Synthesis of (+)-Dixiamycin B methyl ester ( <b>24b</b> )                                         | S43-S44   |
| Total Synthesis of (+)-Dixiamycin A [(+)- <b>1a</b> ]                                             | S44-S48   |
| Total Synthesis of (+)-Dixiamycin B [(+)- <b>1b</b> ]                                             | S49-S53   |
| Spectral Data                                                                                     | S54-S107  |
| X-Ray Crystallographic Data                                                                       | S108-S112 |
| Determination of dr of atropo-diastereomers <b>23a-b</b> and <b>24a-b</b>                         | S113-S114 |
| Comparison of retention times via HPLC analysis of <b>1a</b> , <b>1b</b> , and <b>2a</b>          | S115-S119 |
| References                                                                                        | S120      |

## Materials and Methods

Unless otherwise stated, reactions were carried out using oven dried glass ware with Teflon coated magnetic stirring bars were used to stir the reactions. The Syringe was used to transfer the solvents and liquid reagents. Tetrahydrofuran (THF) Diethyl ether (Et<sub>2</sub>O) were distilled over sodium/benzophenone ketyl. Dichloromethane (CH<sub>2</sub>Cl<sub>2</sub>) was distilled over calcium hydride. All other solvents like MeOH, EtOAc, DMF, Dichloroethane (DCE) and reagents were used as received. Reaction temperatures above 25 °C were maintained by using oil bath on a magnetic stirrer. Thin layer chromatography (TLC) analysis was performed by using silica gel precoated plates (0.25 mm) 60 (F-254), Visualized by UV irradiation, yellow dip stain and other stains. Silica gel of particle size 230-400 and 100-200 mesh were used to perform flash chromatography. Digital melting point apparatus is used to record the melting points. <sup>1</sup>H-NMR spectra was recorded by using 400, 500 MHz spectrometers, <sup>13</sup>C-NMR operating frequencies are 100, 125 MHz respectively. Chemical shifts (δ) are reported in ppm relative to the residual solvents (CDCl<sub>3</sub>) signal (δ = 7.29 for <sup>1</sup>H NMR and δ = 77.0 for <sup>13</sup>C NMR) and (CD<sub>3</sub>OD) signal (δ = 3.33 for <sup>1</sup>H NMR and δ = 49.0 for <sup>13</sup>C NMR). Data for <sup>1</sup>H NMR spectra are reported as follows: chemical shift (multiplicity, coupling constants, and number of hydrogen). Abbreviations are as follows: s (singlet), d (doublet), t (triplet), q (quartet), m (multiplet), br (broad). IR spectra were recorded on a FT-IR system (Spectrum BX) and are reported in frequency of absorption (cm<sup>-1</sup>). Only selected IR absorbencies are reported. High Resolution Mass Spectrometry (HRMS) data was recorded on MicrOTOF-Q-II mass spectrometer using methanol as solvent. Optical rotations were measured on an automatic polarimeter. Enantiomeric excess was determined by chiral HPLC analysis performed on HPLC system with Daicel Chiralpak IC-3 column.

**Cu-catalyzed Csp<sup>3</sup>-Csp<sup>3</sup> bond formation (12):**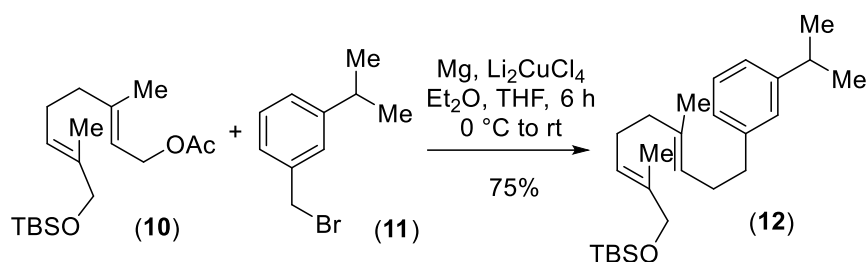

In oven-dried round bottom flask Mg turnings (221 mg, 9.18 mmol, 1.5 equiv.) was taken in 8 mL diethyl ether solvent. To this solution, isopropyl benzyl bromide **11** (1.96 g, 9.18 mmol, 1.5 equiv.) in 10 mL Et<sub>2</sub>O solvent was added drop wise manner and stirred the mixture for 1.5 h at room temperature. Then the mixture was cooled at 0 °C and Li<sub>2</sub>CuCl<sub>4</sub> (6.12 mL, 0.612 mmol, 0.1 equiv.) was added slowly to it and stirred for another 10 min at the same temperature. Then acetate **10** (2 g, 6.12 mmol, 1.0 equiv.) in 8 mL THF solvent was added to the mixture drop wise manner over 10 minutes and stirred the reaction mixture for another 4 h at room temperature. After completion of the reaction (monitored by TLC), saturated aqueous NH<sub>4</sub>Cl solution (10 mL) was added to the reaction mixture. The reaction mixture was then partitioned and extracted with EtOAc (15 mL X 2). The combined organic layers were concentrated in a rotary evaporator under reduced pressure and crude product was purified by flash column chromatography with 1.5% EtOAc in *n*-Hexane to afford **12** as light-yellow liquid (1.84 g, 75% yield).

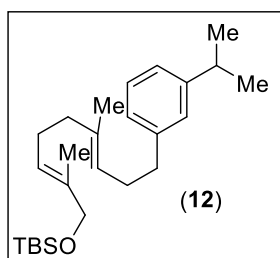**tert-Butyl(((2*E*,6*E*)-9-(3-isopropylphenyl)-2,6-dimethylnona-2,6-dien-1**

**yl)oxy)dimethylsilane [12]:** **12** was obtained as light yellow liquid (6.12 mmol scale of reaction; 1.84 g; 75% yield). *R<sub>f</sub>* = 0.6 (in *n*-hexane).

**<sup>1</sup>H NMR** (500 MHz, CDCl<sub>3</sub>) δ 7.23 (t, *J* = 7.7 Hz, 1H), 7.07 (t, *J* = 3.3 Hz, 2H), 7.04 (d, *J* = 7.5 Hz, 1H), 5.43 – 5.37 (m, 1H), 5.23 (t, *J* = 7.1 Hz, 1H), 4.03 (s, 2H), 2.90 (p, *J* = 6.9 Hz, 1H), 2.65 (t, *J* = 7.9 Hz, 2H), 2.33 (q, *J* = 7.6 Hz, 2H), 2.15 (q, *J* = 7.4 Hz, 2H), 2.04 (t, *J* = 7.7

Hz, 2H), 1.63 (s, 3H), 1.59 (s, 3H), 1.28 (d,  $J = 1.2$  Hz, 3H), 1.27 (d,  $J = 1.1$  Hz, 3H), 0.94 (d,  $J = 1.1$  Hz, 9H), 0.09 (d,  $J = 1.1$  Hz, 6H).

$^{13}\text{C}$  NMR (125 MHz,  $\text{CDCl}_3$ )  $\delta$  148.7, 142.4, 135.5, 134.3, 128.2, 126.6, 125.8, 124.4, 123.9, 123.7, 68.7, 39.4, 36.2, 34.1, 30.0, 26.2, 25.9(2C), 24.1, 18.4, 15.9, 13.4, -5.2(3C).

IR (neat)  $\nu_{\text{max}}$  2858, 2785, 1683, 1498, 1095, 812  $\text{cm}^{-1}$ .

HRMS (ESI)  $m/z$ :  $[\text{M} + \text{Na}]^+$  calcd. for  $[\text{C}_{26}\text{H}_{44}\text{OSi} + \text{Na}]^+$  423.3054, found 423.3086.

### Synthesis of allyl alcohol compound **13** from compound **12**:

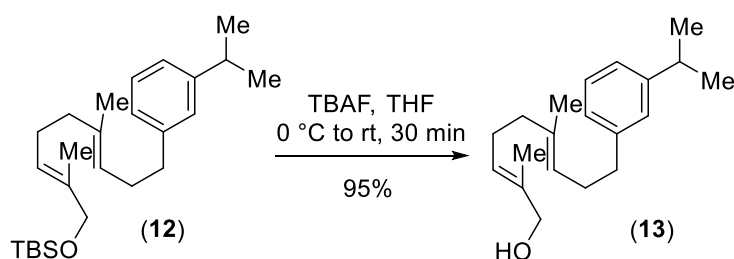

In over-dried round bottom flask compound **12** (10.25 g, 25.60 mmol, 1.0 equiv.) was taken in 35 mL dry THF solvent and cooled at 0 °C. To the solution TBAF 1(M) in THF solution (28.16 mL, 28.16 mmol, 1.1 equiv.) was added drop wise at the same temperature and stirred the reaction mixture at room temperature for 30 minutes. After completion of reaction (monitored by TLC) purification of the crude mixture was completed using flash column chromatography with 10-20% EtOAc in *n*-Hexane to afford **13** as colorless liquid (6.96 g, 95% yields).

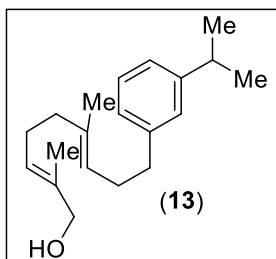

**(2E,6E)-9-(3-Isopropylphenyl)-2,6-dimethylnona-2,6-dien-1-ol [13]:** **13** was obtained as colorless liquid (25.6 mmol scale of reaction; 6.96 g; 95%).  $R_f = 0.2$  (10% EtOAc in *n*-hexane).

$^1\text{H}$  NMR (500 MHz,  $\text{CDCl}_3$ )  $\delta$  7.23 (t,  $J = 7.8$  Hz, 1H), 7.08 (d,  $J = 6.0$  Hz, 2H), 7.04 (d,  $J = 7.5$  Hz, 1H), 5.45 – 5.38 (m, 1H), 5.23 (t,  $J = 7.2$  Hz, 1H), 4.02 (s, 2H), 2.91 (p,  $J = 6.9$  Hz,



<sup>1</sup>H), 2.66 (t, *J* = 7.8 Hz, 2H), 2.34 (q, *J* = 7.6 Hz, 2H), 2.16 (q, *J* = 7.6 Hz, 2H), 2.05 (t, *J* = 7.8 Hz, 2H), 1.70 (s, 3H), 1.60 (s, 3H), 1.28 (d, *J* = 6.9 Hz, 6H).

<sup>13</sup>C NMR (125 MHz, CDCl<sub>3</sub>) δ 148.8, 142.3, 135.3, 134.7, 128.2, 126.6, 126.1, 125.8, 124.0, 123.7, 69.0, 39.3, 36.2, 34.1, 29.9, 26.2, 24.1 (2C), 15.9, 13.7.

IR (neat) ν<sub>max</sub> 3405, 2843, 1695, 1668, 1501, 1120 cm<sup>-1</sup>.

HRMS (ESI) *m/z*: [M+ Na]<sup>+</sup> calcd. for [C<sub>20</sub>H<sub>30</sub>O + Na]<sup>+</sup> 309.2189, found 309.2199.

### Synthesis of racemic epoxy-alcohol (±)-14:

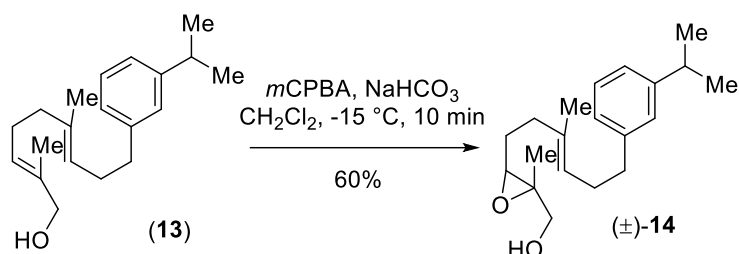

In an oven-dried round bottom flask allyl alcohol **13** (500 mg, 1.75 mmol, 1.0 equiv.) was taken in 6 mL CH<sub>2</sub>Cl<sub>2</sub> and cooled to -15 °C. To this solution NaHCO<sub>3</sub> (147 mg, 3.5 mmol, 2.0 equiv.) was added followed by *m*CPBA (332 mg, 1.93 mmol, 1.1 equiv.) as solids. The reaction mixture was stirred at that temperature for 10 minutes. After completion of reaction (monitored by TLC), reaction mixture was quenched with saturated aqueous NaHCO<sub>3</sub> solution (2 mL). The biphasic layers were separated and the aqueous layer was extracted with CH<sub>2</sub>Cl<sub>2</sub> (10 mL X 2). The Organic layer was collected and dried over Na<sub>2</sub>SO<sub>4</sub> and evaporated under reduced pressure. Now the crude product was purified by flash chromatography with 25% EtOAc in *n*-Hexane to afford epoxy alcohol (±)-**14** as light yellow coloured liquid (318 mg, 60% yield).

### Synthesis of enantioselective epoxy-alcohol (-)-14:

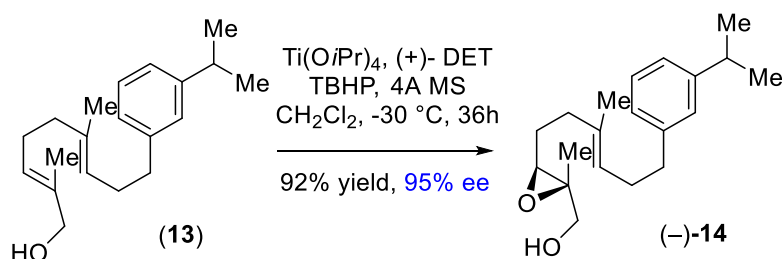

In an oven-dried long neck round bottom flask 4 Å MS was taken in 12 mL CH<sub>2</sub>Cl<sub>2</sub>. To it Ti(*o*<sup>*i*</sup>pr)<sub>4</sub> (679 μL, 2.27 mmol, 0.1 equiv.) and (+)-diethyl-L-tartrate (467 μL, 2.72 mmol, 0.12 equiv.) were added at – 30 °C followed by addition of *t*-BuOOH (8.25 mL, 45.38 mmol, 2 equiv., 5.5 M in decane) simultaneously. The mixture was stirred vigorously at the same temperature for 20 min. Then allyl alcohol **13** (6.5 g, 22.69 mmol, 1.0 equiv.) in 12 mL CH<sub>2</sub>Cl<sub>2</sub> was added to this mixture drop wise manner and stirred for 36 h at the same temperature. After completion of reaction (monitored by TLC), reaction mixture was quenched with saturated aq. Na<sub>2</sub>SO<sub>3</sub> solution (10 mL). Then the biphasic layer was extracted with CH<sub>2</sub>Cl<sub>2</sub> (15 mL X 3). The combined organic layers were dried over anhydrous Na<sub>2</sub>SO<sub>4</sub> and concentrated in a rotary evaporator under reduced pressure. The crude product was purified by flash column chromatography with 25% EtOAc in *n*-Hexane to afford epoxy alcohol (–)-**14** as light yellow colored liquid (6.31 g, 92% yield).

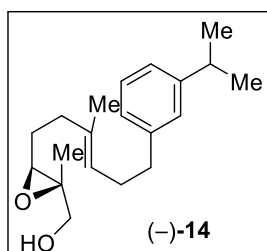

**((2*S*,3*S*)-3-((*E*)-6-(3-Isopropylphenyl)-3-methylhex-3-en-1-yl)-2-methyloxiran-2-**

**yl)methanol [(–)-**14**]:** (–)-**14** was obtained as light yellow coloured liquid (22.69 mmol scale of reaction; 6.31 g; 92%). *R*<sub>f</sub> = 0.2 (20% EtOAc in *n*-hexane).

**<sup>1</sup>H NMR** (500 MHz, CDCl<sub>3</sub>) δ 7.22 (t, *J* = 7.5 Hz, 1H), 7.07 (d, *J* = 8.2 Hz, 2H), 7.03 (d, *J* = 7.6 Hz, 1H), 5.27 (t, *J* = 7.2 Hz, 1H), 3.69 (dd, *J* = 12.1, 3.9 Hz, 1H), 3.58 (dd, *J* = 12.2, 8.3 Hz, 1H), 3.04 (t, *J* = 6.3 Hz, 1H), 2.90 (p, *J* = 6.9 Hz, 1H), 2.65 (t, *J* = 7.8 Hz, 2H), 2.34 (q, *J* = 7.6 Hz, 2H), 2.15 (dq, *J* = 21.9, 7.1 Hz, 2H), 1.70 (dt, *J* = 15.0, 7.8 Hz, 2H), 1.60 (s, 3H), 1.30 (s, 3H), 1.28 (s, 3H), 1.26 (s, 3H).

**<sup>13</sup>C NMR** (125 MHz, CDCl<sub>3</sub>) δ 148.8, 142.1, 134.5, 128.2, 126.6, 125.9, 124.6, 123.8, 65.4, 60.9, 59.9, 36.3, 36.1, 34.1, 29.9, 26.8, 24.1(2C), 15.9, 14.3.

**IR** (neat) *ν*<sub>max</sub> 3451, 2938, 1720, 1558, 1457, 1243, 915, 728 cm<sup>–1</sup>.

**HRMS** (ESI) *m/z*: [M+ Na]<sup>+</sup> calcd. for [C<sub>20</sub>H<sub>30</sub>O<sub>2</sub> + Na]<sup>+</sup> 325.2138, found 325.2145.

Enantiomeric excess of pure compound was determined via HPLC analysis using a Chiralpak IC-3 column; solvent: *n*-hexane/2-propanol = 99.5/0.5; flow rate: 1.00 mL/min; detection: at 270.0 nm:  $t_{R\text{major}} = 17.416$  min,  $t_{R\text{minor}} = 18.554$  min (ee = 95%);  $[\alpha]_{D}^{20} = -8.0$  ( $c = 1.26$ ,  $\text{CHCl}_3$ ).

### Total Synthesis of 4-*epi*-Triptobenzene L [(+)-4]:

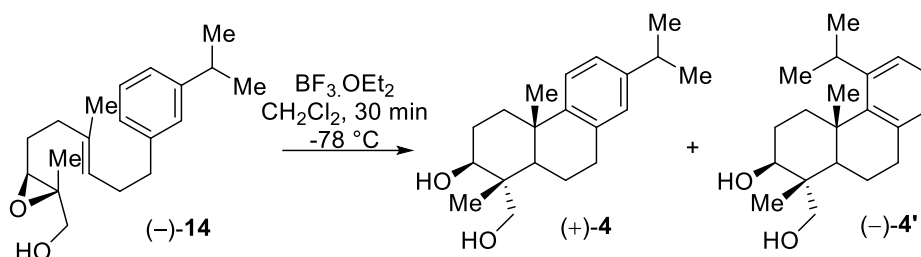

In an oven-dried round bottom flask epoxy alcohol compound **(-)-14** (540 mg, 1.79 mmol, 1.0 equiv.) was taken in 8 mL  $\text{CH}_2\text{Cl}_2$  and cooled at  $-78^\circ\text{C}$ . To the solution 3 M solution of  $\text{BF}_3 \cdot \text{OEt}_2$  (717  $\mu\text{L}$ , 2.15 mmol, 1.2 equiv.) was added in a drop wise manner. The mixture was stirred at that temperature for 30 minutes and after completion of reaction (monitored by TLC) was quenched with saturated aqueous  $\text{NaHCO}_3$  solution (5 mL). The biphasic layers were separated and the aqueous layer was extracted with  $\text{CH}_2\text{Cl}_2$  (6 mL X 2). The combined organic layers were dried over anhydrous  $\text{Na}_2\text{SO}_4$  and concentrated in a rotary evaporator under vacuum. The crude product was purified by flash column chromatography with 22-30% EtOAc in *n*-Hexane to afford **(+)-4** (341 mg, 63% yields) along with **(+)-4'** (92 mg, 17% yield) as white foam.

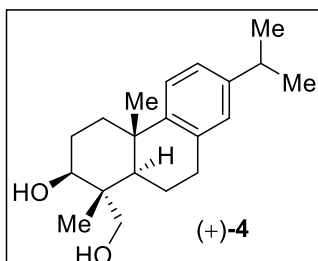

**(1*R*,2*S*,4*aS*,10*aR*)-1-(Hydroxymethyl)-7-isopropyl-1,4*a*-dimethyl-1,2,3,4,4*a*,9,10,10*a*-octahydrophenanthren-2-ol [(+)-4]:** **(+)-4** was obtained as colourless gel (1.79 mmol scale of reaction; 341 mg; 63%).  $R_f = 0.23$  (40% EtOAc in *n*-hexane).

**<sup>1</sup>H NMR** (400 MHz, CDCl<sub>3</sub>)  $\delta$  7.14 (d,  $J$  = 8.1 Hz, 1H), 6.98 (d,  $J$  = 8.1 Hz, 1H), 6.87 (s, 1H), 3.80 (d,  $J$  = 10.3 Hz, 1H), 3.70 (dd,  $J$  = 9.1, 7.1 Hz, 1H), 3.47 (d,  $J$  = 10.3 Hz, 1H), 2.95 – 2.87 (m, 1H), 2.82 (m, 2H), 2.29 (dt,  $J$  = 13.1, 3.4 Hz, 1H), 1.83 – 1.76 (m, 3H), 1.74 – 1.69 (m, 1H), 1.57 – 1.49 (m, 1H), 1.44 (dd,  $J$  = 12.0, 2.6 Hz, 1H), 1.22 (s, 3H), 1.21 (s, 3H), 1.20 (s, 3H), 1.0 (s, 3H).

**<sup>13</sup>C NMR** (100 MHz, CDCl<sub>3</sub>)  $\delta$  146.6, 145.9, 134.6, 126.8, 124.4, 124.1, 76.9, 72.3, 44.7, 42.1, 37.3, 36.7, 33.5, 30.4, 27.6, 25.3, 24.0, 24.0, 19.2, 11.2.

**IR** (neat)  $\nu_{\max}$  3654, 3340, 2845, 1671, 1541, 1481, 1250, 832 cm<sup>-1</sup>.

**HRMS** (ESI)  $m/z$ : [M+ Na]<sup>+</sup> calcd. for [C<sub>20</sub>H<sub>30</sub>O<sub>2</sub> + Na]<sup>+</sup> 325.2138, found 325.2142.

$[\alpha]^{25}_{589}$  = +41.50 ( $c$  = 0.7, CHCl<sub>3</sub>); lit.<sup>[1]</sup>  $[\alpha]_D^{26}$  = +52.1 ( $c$  = 1.0, CHCl<sub>3</sub>), lit.<sup>[2]</sup>  $[\alpha]_D^{20}$  = +50.9 ( $c$  = 0.31, CHCl<sub>3</sub>).

**Comparison of NMR Data of 4-*epi*-triptobenzene L [(+)-**4**]** of this report with literature of (+)-**4** by Kanokmedhakul<sup>[1]</sup> and Carter<sup>[2]</sup>:

**Comparison of <sup>1</sup>H-NMR Data:**

| Isolation report: (+)-4- <i>epi</i> -triptobenzene L [(+)- <b>4</b> ]<br>( <sup>1</sup> H-NMR, 400 MHz, CDCl <sub>3</sub> ) <sup>[1]</sup> |      |       |                   |
|--------------------------------------------------------------------------------------------------------------------------------------------|------|-------|-------------------|
| $\delta$ (ppm)                                                                                                                             | Int. | mult. | $J$ (Hz)          |
| 7.15                                                                                                                                       | 1H   | d     | $J$ = 8.2 Hz      |
| 7.00                                                                                                                                       | 1H   | dd    | $J$ = 8.2, 1.6 Hz |
| 6.89                                                                                                                                       | 1H   | d     | $J$ = 1.6 Hz      |
| 3.80                                                                                                                                       | 1H   | ABd   | $J$ = 10.4 Hz     |
| 3.70                                                                                                                                       | 1H   | dd    | $J$ = 9.2, 6.8 Hz |

|      |    |      |                    |
|------|----|------|--------------------|
| 3.50 | 1H | ABd  | $J = 10.4$ Hz      |
| 2.90 | 1H | m    | -                  |
| 2.83 | 1H | m    | -                  |
| 2.80 | 1H | sept | $J = 6.8$ Hz       |
| 2.30 | 1H | dt   | $J = 13.2, 3.4$ Hz |
| 1.80 | 3H | m    | -                  |
| 1.76 | 1H | m    | -                  |
| 1.53 | 1H | m    | -                  |
| 1.46 | 1H | dd   | $J = 11.8, 2.6$ Hz |
| 1.22 | 3H | d    | $J = 6.8$ Hz       |
| 1.22 | 3H | d    | $J = 6.8$ Hz       |
| 1.21 | 3H | s    | -                  |
| 1.00 | 3H | s    | -                  |

| Carter's report (+)-4- <i>epi</i> -triptobenzene L [(+)- <b>4</b> ]<br>( <sup>1</sup> H-NMR, 700 MHz, CDCl <sub>3</sub> ) <sup>[2]</sup> |      |       |                    |
|------------------------------------------------------------------------------------------------------------------------------------------|------|-------|--------------------|
| $\delta$ (ppm)                                                                                                                           | Int. | mult. | $J$ (Hz)           |
| 7.16                                                                                                                                     | 1H   | d     | $J = 8.2$ Hz       |
| 6.99                                                                                                                                     | 1H   | d     | $J = 8.2$ Hz       |
| 6.89                                                                                                                                     | 1H   | s     | -                  |
| 3.82                                                                                                                                     | 1H   | d     | $J = 10.3$ Hz      |
| 3.71                                                                                                                                     | 1H   | t     | $J = 8.1$ Hz       |
| 3.48                                                                                                                                     | 1H   | d     | $J = 10.3$ Hz      |
| 2.92                                                                                                                                     | 1H   | dd    | $J = 17.0, 6.2$ Hz |
| 2.87 - 2.79                                                                                                                              | 2H   | m     | -                  |
| 2.31                                                                                                                                     | 1H   | dt    | $J = 13.2, 3.4$ Hz |
| 1.84 - 1.76                                                                                                                              | 1H   | m     | -                  |
| 1.84 - 1.76                                                                                                                              | 1H   | m     | -                  |
| 1.84 - 1.76                                                                                                                              | 1H   | m     | -                  |

|           |    |    |                    |
|-----------|----|----|--------------------|
| 1.52-1.57 | 1H | m  | -                  |
| 1.44      | 1H | dd | $J = 12.3, 2.0$ Hz |
| 1.22      | 3H | d  | $J = 6.8$ Hz       |
| 1.22      | 3H | d  | $J = 6.8$ Hz       |
| 1.21      | 3H | s  | -                  |
| 1.0       | 3H | s  | -                  |

| This report (+)-4- <i>epi</i> -triptobenzene L [(+)- <b>4</b> ]<br>( <sup>1</sup> H-NMR, 400 MHz, CDCl <sub>3</sub> ) |      |       |                    |
|-----------------------------------------------------------------------------------------------------------------------|------|-------|--------------------|
| δ (ppm)                                                                                                               | Int. | mult. | $J$ (Hz)           |
| 7.14                                                                                                                  | 1H   | d     | $J = 8.1$ Hz       |
| 6.98                                                                                                                  | 1H   | d     | $J = 8.1$ Hz       |
| 6.87                                                                                                                  | 1H   | s     | -                  |
| 3.80                                                                                                                  | 1H   | d     | $J = 10.3$ Hz      |
| 3.70                                                                                                                  | 1H   | dd    | $J = 9.1, 7.1$ Hz  |
| 3.47                                                                                                                  | 1H   | d     | $J = 10.3$ Hz      |
| 2.95 – 2.87                                                                                                           | 1H   | m     | -                  |
| 2.82                                                                                                                  | 2H   | m     | -                  |
| 2.29                                                                                                                  | 1H   | dt    | $J = 13.1, 3.4$ Hz |
| 1.83 – 1.76                                                                                                           | 3H   | m     | -                  |
| 1.74 – 1.69                                                                                                           | 1H   | m     | -                  |
| 1.57 – 1.49                                                                                                           | 1H   | m     | -                  |
| 1.44                                                                                                                  | 1H   | dd    | $J = 12.0, 2.6$ Hz |
| 1.22                                                                                                                  | 3H   | s     | -                  |
| 1.21                                                                                                                  | 3H   | s     | -                  |
| 1.20                                                                                                                  | 3H   | s     | -                  |
| 1.0                                                                                                                   | 3H   | s     | -                  |

**Comparison of  $^{13}\text{C}$ -NMR Data:**

| Isolation report on (+)-4-<br><i>epi</i> -triptobenzene L [(+)- <b>4</b> ]<br>( $^{13}\text{C}$ NMR, 100 MHz,<br>$\text{CDCl}_3$ ) <sup>[1]</sup> | Carter's report on (+)-4-<br><i>epi</i> -triptobenzene L [(+)- <b>4</b> ]<br>( $^{13}\text{C}$ NMR, 175 MHz,<br>$\text{CDCl}_3$ ) <sup>[2]</sup> | This report: (+)-4- <i>epi</i> -<br>triptobenzene L [(+)- <b>4</b> ]<br>( $^{13}\text{C}$ NMR, 100 MHz,<br>$\text{CDCl}_3$ ) |
|---------------------------------------------------------------------------------------------------------------------------------------------------|--------------------------------------------------------------------------------------------------------------------------------------------------|------------------------------------------------------------------------------------------------------------------------------|
| 146.5                                                                                                                                             | 146.5                                                                                                                                            | 146.6                                                                                                                        |
| 145.8                                                                                                                                             | 145.9                                                                                                                                            | 145.9                                                                                                                        |
| 134.2                                                                                                                                             | 134.5                                                                                                                                            | 134.6                                                                                                                        |
| 126.7                                                                                                                                             | 126.8                                                                                                                                            | 126.8                                                                                                                        |
| 124.3                                                                                                                                             | 124.3                                                                                                                                            | 124.4                                                                                                                        |
| 123.9                                                                                                                                             | 124.0                                                                                                                                            | 124.1                                                                                                                        |
| 76.8                                                                                                                                              | 76.9                                                                                                                                             | 76.9                                                                                                                         |
| 72.2                                                                                                                                              | 72.4                                                                                                                                             | 72.3                                                                                                                         |
| 44.6                                                                                                                                              | 44.6                                                                                                                                             | 44.7                                                                                                                         |
| 42.1                                                                                                                                              | 42.1                                                                                                                                             | 42.1                                                                                                                         |
| 37.2                                                                                                                                              | 37.2                                                                                                                                             | 37.3                                                                                                                         |
| 36.8                                                                                                                                              | 36.6                                                                                                                                             | 36.7                                                                                                                         |
| 33.4                                                                                                                                              | 33.5                                                                                                                                             | 33.5                                                                                                                         |
| 30.3                                                                                                                                              | 30.4                                                                                                                                             | 30.4                                                                                                                         |
| 27.5                                                                                                                                              | 27.6                                                                                                                                             | 27.6                                                                                                                         |
| 25.2                                                                                                                                              | 25.2                                                                                                                                             | 25.3                                                                                                                         |
| 23.9                                                                                                                                              | 24.0                                                                                                                                             | 24.0                                                                                                                         |
| 23.9                                                                                                                                              | 24.0                                                                                                                                             | 24.0                                                                                                                         |
| 19.1                                                                                                                                              | 19.1                                                                                                                                             | 19.1                                                                                                                         |
| 11.1                                                                                                                                              | 11.1                                                                                                                                             | 11.2                                                                                                                         |

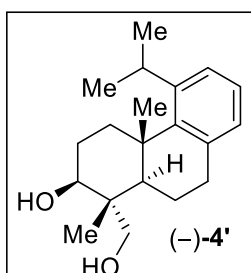

(1*R*,2*S*,4*aS*)-1-(Hydroxymethyl)-5-isopropyl-1,4*a*-dimethyl-1,2,3,4,4*a*,9,10,10*a*-octahydrophenanthren-2-ol [(-)-4']: (-)-4' was obtained as white foam (1.79 mmol scale of reaction; 92 mg; 17%).  $R_f$  = 0.25 (40% EtOAc in *n*-hexane).

**$^1\text{H}$  NMR** (500 MHz,  $\text{CDCl}_3$ )  $\delta$  7.25 (dt,  $J$  = 7.5, 4.6 Hz, 1H), 7.10 (d,  $J$  = 7.9 Hz, 1H), 7.06 (d,  $J$  = 10.8 Hz, 1H), 3.97 (d,  $J$  = 11.0 Hz, 1H), 3.86 (d,  $J$  = 10.5 Hz, 1H), 3.71 (d,  $J$  = 10.4 Hz, 1H), 2.91 (p,  $J$  = 7.1 Hz, 1H), 2.64 (t,  $J$  = 8.7 Hz, 2H), 2.27 (dtt,  $J$  = 34.6, 17.1, 8.3 Hz, 4H), 2.09 – 2.01 (m, 1H), 1.86 – 1.77 (m, 1H), 1.75 (s, 3H), 1.71 (s, 1H), 1.30 – 1.27 (m, 6H), 1.10 (d,  $J$  = 2.7 Hz, 3H).

**$^{13}\text{C}$  NMR** (125 MHz,  $\text{CDCl}_3$ )  $\delta$  149.1, 142.4, 132.2, 131.0, 128.5, 126.4, 125.5, 123.9, 73.8, 69.8, 45.1, 36.2, 34.1, 31.0, 27.0, 24.1, 19.9, 15.9.

**IR** (neat)  $\nu_{\text{max}}$  3362, 3349, 2954, 1665, 1501, 1460, 1071, 821  $\text{cm}^{-1}$ .

**HRMS** (ESI)  $m/z$ :  $[\text{M} + \text{Na}]^+$  calcd. for  $[\text{C}_{20}\text{H}_{30}\text{O}_2 + \text{Na}]^+$  325.2138, found 325.2140.

$[\alpha]_D^{25} = -36.67$  ( $c$  = 0.63,  $\text{CHCl}_3$ ).

### Synthesis of $\beta$ -hydroxy ester (+)-9:

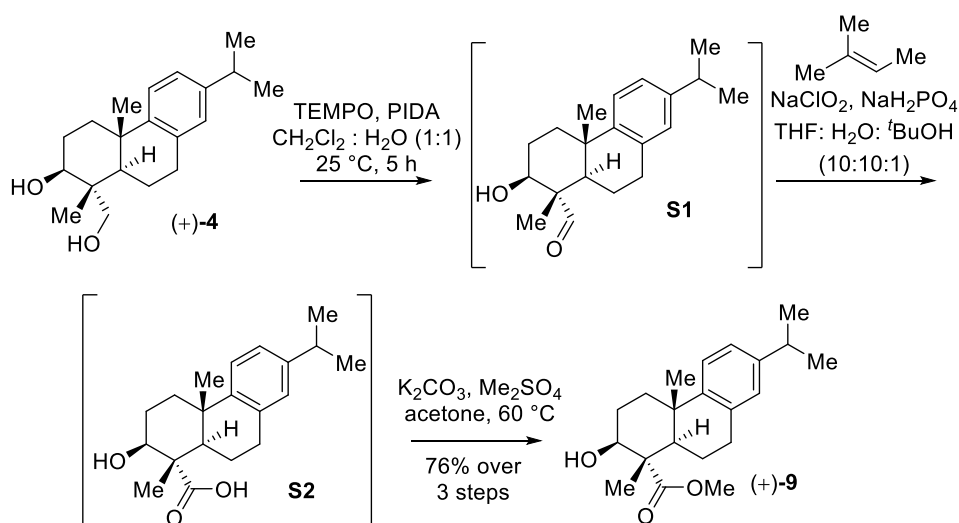



Diol (+)-**4** (4.85 g, 16.04 mmol, 1.0 equiv.) was taken in a mixture of CH<sub>2</sub>Cl<sub>2</sub>: H<sub>2</sub>O (1:1, 20 mL) at room temperature. To this solution was added TEMPO (3.23 g, 20.85 mmol, 1.3 equiv.) and stirred for 5 minutes. Next, PIDA (6.71 g, 20.85 mmol, 1.3 equiv.) was added portion wise to the reaction mixture. The resulting orange-brown mixture was vigorously stirred for an additional 5 h at the same temperature. After completion of reaction (monitored by TLC) saturated aqueous NaHCO<sub>3</sub> (8 mL) was added and excess oxidants were quenched with Na<sub>2</sub>S<sub>2</sub>O<sub>3</sub> (8 mL) and stirred for 5 more minutes. The mixture was extracted with dichloromethane (15 mL X 2). The organic layers were dried over anhydrous Na<sub>2</sub>SO<sub>4</sub> and concentrated in a rotary evaporator under vacuum to afford crude β-hydroxy aldehyde **S1** which was taken for next step without further purification.

β-hydroxy aldehyde **S1** (16.04 mmol, 1.0 equiv.) was taken in a mixture of tetrahydrofuran, *tert*-butanol and water [THF: H<sub>2</sub>O: *t*BuOH (10:10:1)] at 25 °C and 2-methyl-2-butene (17 mL, 160.4 mmol, 10.0 equiv.) was added to the reaction vessel. After 5 minutes of stirring, NaH<sub>2</sub>PO<sub>4</sub> (9.62 g, 80.2 mmol, 5.0 equiv.) was added to the reaction mixture and it was cooled to 0 °C. Then NaClO<sub>2</sub> (4.35 g, 48.12 mmol, 3.0 equiv.) was added portion wise over a period of 10 minutes. The reaction mixture was allowed to warm to 25 °C and stirring was continued for an additional 2 h. After complete consumption of the starting material (as judged by TLC), it was diluted with water and pH<3 was maintained by addition of 2(*N*) HCl. Next, mixture was extracted with EtOAc (15 mL X 3) and organic layer was dried over Na<sub>2</sub>SO<sub>4</sub> and concentrated in a rotary evaporator under vacuum to afford β-hydroxy acid **S2** which was taken for the next step without further purification.

In an oven-dried round-bottom flask, crude **S2** (16.04 mmol, 1.0 equiv.) was dissolved in acetone (18 mL) and Me<sub>2</sub>SO<sub>4</sub> (1.82 mL, 19.25 mmol, 1.2 equiv.) was added at 25 °C. Next, K<sub>2</sub>CO<sub>3</sub> (2.7 g, 19.25 mmol, 1.2 equiv.) was added to the reaction mixture portion wise over a period of 5 minutes and it was placed on a pre-heated oil bath maintaining temperature at 60 °C and stirring was continued for 2 h. After completion of the reaction (monitored by TLC), 8 mL water was added and it was filtered through a celite bed and solids were washed with 40% EtOAc in *n*-hexane (20 mL X 2). The organic layers were dried over Na<sub>2</sub>SO<sub>4</sub> and concentrated in a rotary evaporator under vacuum. The residue was purified by flash column chromatography using 20% EtOAc in *n*-hexane to afford β-hydroxy ester (+)-**9** as white foam (4.03 g, 76% yield over 3 steps).

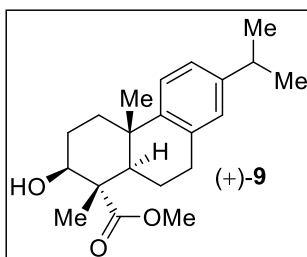

**Methyl (1*S*,2*S*,4*aS*,10*aR*)-2-hydroxy-7-isopropyl-1,4*a*-dimethyl-1,2,3,4,4*a*,9,10,10*a*-octahydrophenanthrene-1-carboxylate [(+)-9]:** (+)-9 was obtained as white foam (16.04 mmol scale; 4.03 g; 76% yield).  $R_f = 0.20$  (20% EtOAc in *n*-hexane).

**$^1\text{H}$  NMR** (500 MHz,  $\text{CDCl}_3$ )  $\delta$  7.18 (d,  $J = 8.1$  Hz, 1H), 7.02 (dd,  $J = 8.1, 2.1$  Hz, 1H), 6.91 (d,  $J = 2.0$  Hz, 1H), 4.06 (dd,  $J = 11.7, 4.6$  Hz, 1H), 3.75 (s, 3H), 2.90 (dt,  $J = 9.9, 4.6$  Hz, 2H), 2.84 (m,  $J = 6.9$  Hz, 1H), 2.36 (dt,  $J = 13.2, 3.5$  Hz, 1H), 2.15 (dd,  $J = 12.5, 2.2$  Hz, 1H), 1.96 – 1.86 (m, 2H), 1.86 – 1.80 (m, 1H), 1.67 (dd,  $J = 13.3, 3.9$  Hz, 1H), 1.44 (ddt,  $J = 13.0, 5.6, 2.6$  Hz, 1H), 1.28 (s, 3H), 1.25 (s, 3H), 1.23 (s, 6H).

**$^{13}\text{C}$  NMR** (125 MHz,  $\text{CDCl}_3$ )  $\delta$  177.8, 146.1, 146.0, 134.5, 126.8, 124.3, 124.1, 75.2, 53.8, 52.2, 45.5, 36.7, 36.6, 33.5, 30.1, 27.3, 25.2, 23.9 (2C), 21.4, 10.7.

**IR** (neat)  $\nu_{\text{max}}$  3350, 1703, 1665, 1480, 1121, 885, 718  $\text{cm}^{-1}$ .

**HRMS** (ESI)  $m/z$ :  $[\text{M} + \text{Na}]^+$  calcd. for  $[\text{C}_{21}\text{H}_{30}\text{O}_3 + \text{Na}]^+$  353.2087, found 353.2096.

$[\alpha]_{589}^{20} = +40.5$  ( $c = 0.87$ ,  $\text{CHCl}_3$ ).

#### Aromatic Electrophilic Bromination of (+)-9:

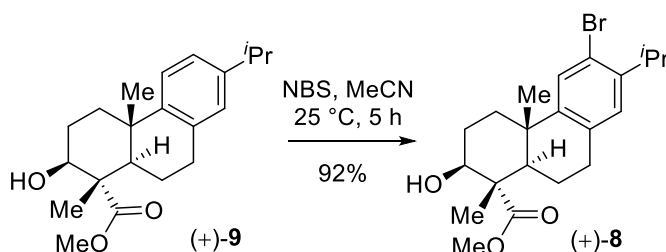

In an oven dried round-bottom flask compound (+)-9 (3.5 g, 10.6 mmol, 1.0 equiv.) was taken in  $\text{CH}_3\text{CN}$  (30 mL) at 25 °C under an argon atmosphere. To this solution was added a recrystallized *N*-bromo succinimide [NBS (2.26 g, 12.72 mmol, 1.2 equiv.)] at 25 °C and stirred for an additional 5 h. After completion of the reaction (confirmed by TLC analysis), it was

quenched with saturated aqueous  $\text{Na}_2\text{S}_2\text{O}_3$  solution (5 mL). The reaction mixture was then extracted with 50% EtOAc in *n*-hexane (30 mL X 2). The organic layers were collected, dried over  $\text{Na}_2\text{SO}_4$  and concentrated in a rotary evaporator under reduced pressure. It was purified by flash chromatography using 25% EtOAc in *n*-hexane to afford (+)-**8** as white foam (4 g, 92% yield).

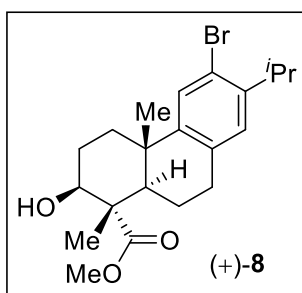

**Methyl (1*R*,2*S*,4*aS*,10*aR*)-6-bromo-2-hydroxy-7-isopropyl-1,4*a*-dimethyl-1,2,3,4,4*a*,9,10,10*a*-octahydrophenanthrene-1-carboxylate [(+)-**8**]:** (+)-**8** was obtained as white foam (10.6 mmol scale; 4 g; 92% yield).  $R_f$  = 0.37 (30% EtOAc in *n*-hexane).

**$^1\text{H}$  NMR** (500 MHz,  $\text{CDCl}_3$ )  $\delta$  7.35 (s, 1H), 6.91 (s, 1H), 4.02 (dd,  $J$  = 11.8, 4.6 Hz, 1H), 3.72 (s, 3H), 3.25 (h,  $J$  = 6.8 Hz, 1H), 2.87 (ddd,  $J$  = 12.2, 6.4, 2.6 Hz, 1H), 2.85 – 2.79 (m, 1H), 2.28 (dt,  $J$  = 13.2, 3.5 Hz, 1H), 2.10 – 2.03 (m, 1H), 1.88 (dt,  $J$  = 11.6, 4.3 Hz, 2H), 1.82 – 1.75 (m, 1H), 1.64 (dd,  $J$  = 13.4, 3.6 Hz, 1H), 1.42 (ddq,  $J$  = 12.5, 7.9, 3.1, 2.6 Hz, 1H), 1.24 (s, 3H), 1.22 (d,  $J$  = 3.2 Hz, 3H), 1.20 (d,  $J$  = 2.4 Hz, 3H), 1.19 (s, 3H).

**$^{13}\text{C}$  NMR** (125 MHz,  $\text{CDCl}_3$ )  $\delta$  177.6, 148.1, 144.3, 134.2, 128.7, 127.0, 121.6, 75.1, 53.6, 52.3, 45.2, 36.8, 36.4, 32.3, 29.6, 27.1, 25.1, 22.9, 22.8, 21.1, 10.7.

**IR** (neat)  $\nu_{\text{max}}$  3347, 1710, 1690, 1520, 1147, 1025, 785  $\text{cm}^{-1}$ .

**HRMS** (ESI)  $m/z$ :  $[\text{M} + \text{Na}]^+$  calcd. for  $[\text{C}_{21}\text{H}_{29}\text{O}_3\text{Br} + \text{Na}]^+$  431.1192, found 431.1170.

$[\alpha]_{589}^{25} = +37.2$  ( $c$  = 0.82,  $\text{CHCl}_3$ ).

***ipso*-Nitration of (+)-**8**:**

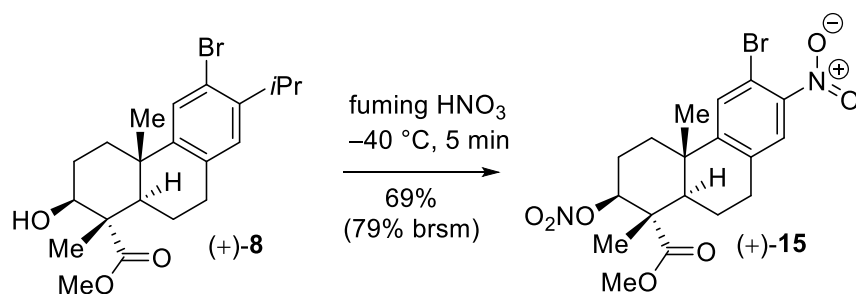

An oven-dried round-bottom flask was charged with 2 mL of fuming nitric acid and it was cooled to  $-40\text{ }^{\circ}\text{C}$ . Then compound (+)-**8** (800 mg, 1.95 mmol, 1.0 equiv.) was directly charged into the reaction vessel and scratched well with a spatula (5 minutes) maintaining the  $-40\text{ }^{\circ}\text{C}$  temperature. After 5 minutes (TLC analysis showed product formation), the reaction mixture was quenched with water (5 mL) and saturated  $\text{NaHCO}_3$  (15 mL) and extracted with  $\text{CH}_2\text{Cl}_2$  (20 mL X 2). The organic layers were dried over  $\text{Na}_2\text{SO}_4$  and concentrated in a rotary evaporator under reduced pressure and purified by column chromatography 10% EtOAc in *n*-hexane to afford compound (+)-**15** as yellow foam [615 mg, 69% yield (79% BRSM)].

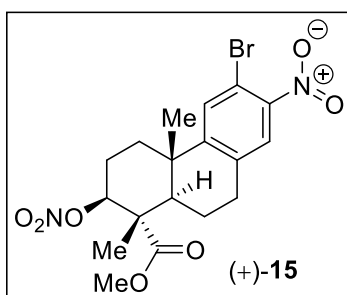

**Methyl (1*S*,2*S*,4*aS*,10*aR*)-6-bromo-1,4*a*-dimethyl-7-nitro-2-(nitrooxy)-1,2,3,4,4*a*,9,10,10*a*-octahydrophenanthrene-1-carboxylate [(+)-**15**]:** (+)-**15** was obtained as a yellow foam. (1.95 mmol scale, 615 mg, 69% yield);  $R_f = 0.31$  (10% EtOAc in *n*-hexane).

**<sup>1</sup>H NMR** (500 MHz, CDCl<sub>3</sub>) δ 7.61 (s, 1H), 7.57 (s, 1H), 5.45 (dd, *J* = 12.2, 4.3 Hz, 1H), 3.76 (s, 3H), 2.99 (dd, *J* = 17.9, 6.9 Hz, 1H), 2.89 (dt, *J* = 18.1, 9.3 Hz, 1H), 2.45 (d, *J* = 13.3 Hz, 1H), 2.19 (dd, *J* = 18.6, 12.8 Hz, 2H), 2.04 – 1.90 (m, 2H), 1.82 (t, *J* = 13.6 Hz, 1H), 1.52 (dd, *J* = 13.8, 7.8 Hz, 1H), 1.34 (s, 3H), 1.28 (s, 3H).

**<sup>13</sup>C NMR** (125 MHz, CDCl<sub>3</sub>) δ 175.2, 153.9, 147.3, 135.7, 131.3, 126.3, 111.6, 85.2, 77.2, 52.9, 51.3, 45.8, 37.5, 35.9, 29.1, 24.8, 22.6, 20.1, 11.7.

**IR** (neat)  $\nu_{\max}$  3310, 2234, 1759, 1558, 1417, 1236, 1183, 998, 801  $\text{cm}^{-1}$ .

**HRMS** (ESI)  $m/z$ :  $[\text{M} + \text{Na}]^+$  calcd. for  $[\text{C}_{18}\text{H}_{21}\text{BrN}_2\text{O}_7 + \text{Na}]^+$  479.0424, found 479.0403.

$[\alpha]^{25}_{589} = +24.9$  ( $c = 0.9$ ,  $\text{CHCl}_3$ ).

### Suzuki Coupling of (+)-**15**:

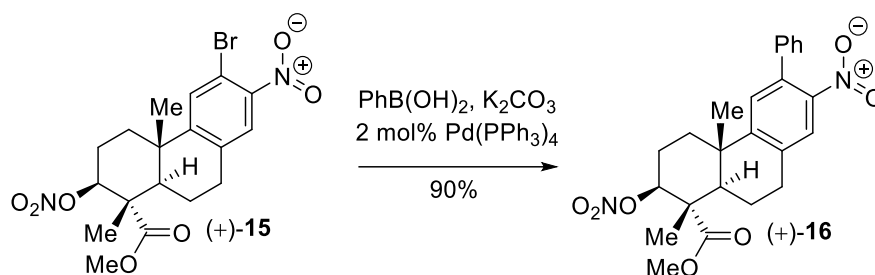

A round-bottom flask was charged with (+)-**15** (2.45 g, 5.36 mmol, 1.0 equiv.) and benzene boronic acid (784 mg, 6.43 mmol, 1.2 equiv.) in a mixture of benzene (18 mL), EtOH (6 mL), and water (6 mL) at room temperature under argon atmosphere. Next, potassium carbonate (1.5 g, 10.72 mmol, 2.0 equiv.) was added to the reaction mixture followed by the addition of catalyst, tetrakis(triphenylphosphine)palladium(0) (124 mg, 0.107 mmol, 0.02 equiv.) at the same temperature. Then the reaction mixture was placed on a pre-heated oil bath maintaining temperature of 80 °C. Upon completion of the reaction (10 h), as monitored by TLC analysis, it was extracted with 20% EtOAc in *n*-hexane (25 mL X 2). The combined organic layers were washed with brine (15 mL X 1) and dried over  $\text{Na}_2\text{SO}_4$  and concentrated in a rotary evaporator under reduced pressure. The crude product was purified by flash chromatography with 10% EtOAc in *n*-hexane to furnish (+)-**16** as a yellow solid (2.19 g, 90% yield).

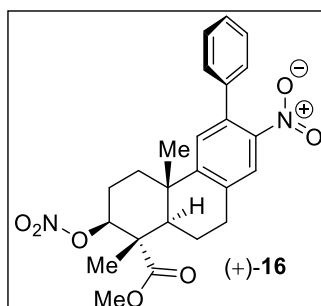

**Methyl (1*S*,2*S*,4*aS*,10*aR*)-1,4*a*-dimethyl-7-nitro-2-(nitrooxy)-6-phenyl-1,2,3,4,4*a*,9,10,10*a*-octahydrophenanthrene-1-carboxylate [(+)-**16**]:** (+)-**16** was obtained as a yellow solid after

recrystallization (mp: 146-150 °C); (5.36 mmol scale, 2.19 g, 90% yield);  $R_f$  = 0.3 (10% EtOAc in *n*-hexane).

**$^1\text{H}$  NMR** (500 MHz,  $\text{CDCl}_3$ )  $\delta$  7.62 (d,  $J$  = 1.1 Hz, 1H), 7.46 – 7.41 (m, 3H), 7.32 – 7.28 (m, 3H), 5.48 (dd,  $J$  = 12.0, 4.4 Hz, 1H), 3.77 (s, 3H), 3.12 – 3.04 (m, 1H), 3.03 – 2.94 (m, 1H), 2.48 (dt,  $J$  = 13.3, 3.5 Hz, 1H), 2.24 (dd,  $J$  = 12.6, 2.3 Hz, 1H), 2.21 – 2.15 (m, 1H), 2.06 – 1.94 (m, 2H), 1.85 (td,  $J$  = 13.6, 3.7 Hz, 1H), 1.55 (ddt,  $J$  = 13.6, 7.7, 2.0 Hz, 1H), 1.36 (s, 3H), 1.31 (s, 3H).

**$^{13}\text{C}$  NMR** (125 MHz,  $\text{CDCl}_3$ )  $\delta$  175.3, 152.5, 146.9, 137.8, 135.3, 134.3, 128.6, 128.3, 128.1, 127.9 (2C), 124.7, 85.5, 77.2, 52.9, 51.4, 46.2, 37.5, 36.0, 29.3, 24.9, 22.6, 20.3, 11.7.

**IR** (neat)  $\nu_{\text{max}}$  3323, 2180, 1710, 1565, 1456, 1236, 890, 725  $\text{cm}^{-1}$ .

**HRMS** (ESI)  $m/z$ :  $[\text{M} + \text{Na}]^+$  calcd. for  $[\text{C}_{24}\text{H}_{26}\text{O}_7\text{N}_2 + \text{Na}]^+$  477.1632, found 477.1653.

$[\alpha]^{25}_{589} = +40.5$  ( $c$  = 0.8,  $\text{CHCl}_3$ ).

### Synthesis of (+)-S3:

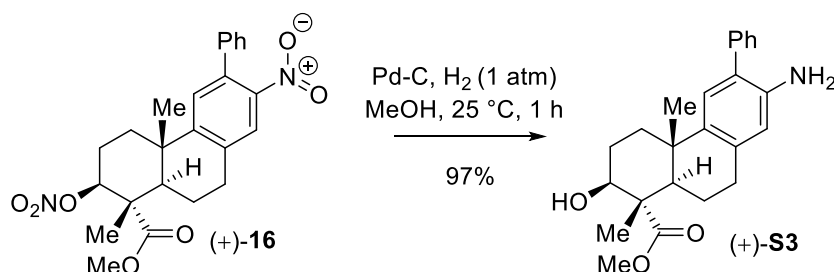

In an oven-dried round-bottom flask compound (+)-**16** (2.1 g, 4.62 mmol, 1.0 equiv.) was taken in MeOH (25 mL) and degassed with  $\text{N}_2$  balloon for 10 minutes. To this solution was added Pd/C (10% w/w) (210 mg) and a  $\text{H}_2$  gas balloon (1 atm.) was placed with the reaction vessel and stirring continued until the full consumption of starting material (1 h), as confirmed by TLC analysis. The reaction mixture was filtered, evaporated to dryness under the reduced pressure, and it was purified by column chromatography with 30% EtOAc in *n*-hexane to afford (+)-**S3** as a white foam (1.7 g, 97% yield).

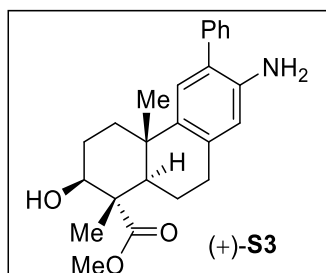

**Methyl (1*S*,2*S*,4*aS*,10*aR*)-7-amino-2-hydroxy-1,4*a*-dimethyl-6-phenyl-1,2,3,4,4*a*,9,10,10*a*-octahydrophenanthrene-1-carboxylate [(+)-**S3**]:** (+)-**S3** was obtained as a white foam (4.62 mmol scale, 1.7 g, 97% yield);  $R_f = 0.25$  (30% EtOAc in *n*-hexane).

**$^1\text{H}$  NMR** (500 MHz,  $\text{CDCl}_3$ )  $\delta$  7.42 (d,  $J = 4.3$  Hz, 4H), 7.32 (dq,  $J = 8.6, 4.6, 4.0$  Hz, 1H), 6.99 (s, 1H), 6.50 (s, 1H), 4.03 (dd,  $J = 11.4, 4.7$  Hz, 1H), 3.72 (s, 3H), 2.89 – 2.76 (m, 2H), 2.28 (dt,  $J = 12.9, 3.3$  Hz, 1H), 2.13 (dd,  $J = 12.5, 2.2$  Hz, 1H), 1.94 – 1.79 (m, 2H), 1.75 (dd,  $J = 11.6, 3.2$  Hz, 1H), 1.64 (dd,  $J = 12.9, 3.8$  Hz, 1H), 1.41 (ddd,  $J = 14.1, 6.1, 3.1$  Hz, 1H), 1.23 (s, 3H), 1.21 (s, 3H).

**$^{13}\text{C}$  NMR** (125 MHz,  $\text{CDCl}_3$ )  $\delta$  177.8, 140.7, 139.9, 139.7, 135.2, 129.1 (2C), 128.8 (2C), 127.1, 126.6, 126.4, 115.6, 75.3, 53.8, 52.2, 45.8, 36.8, 36.5, 29.9, 27.3, 25.3, 21.4, 10.7.

**IR** (neat)  $\nu_{\text{max}}$  3395, 3343, 2810, 1707, 1615, 1460, 1281, 1065, 985, 764, 650  $\text{cm}^{-1}$ .

**HRMS** (ESI)  $m/z$ :  $[\text{M} + \text{H}]^+$  calcd. for  $[\text{C}_{24}\text{H}_{30}\text{O}_3\text{N} + \text{H}]^+$  380.2226, found 380.2218.

$[\alpha]_{589}^{25} = +47.0$  ( $c = 0.73$ ,  $\text{CHCl}_3$ ).

#### Synthesis of Acetanilide derivative (+)-**6**:

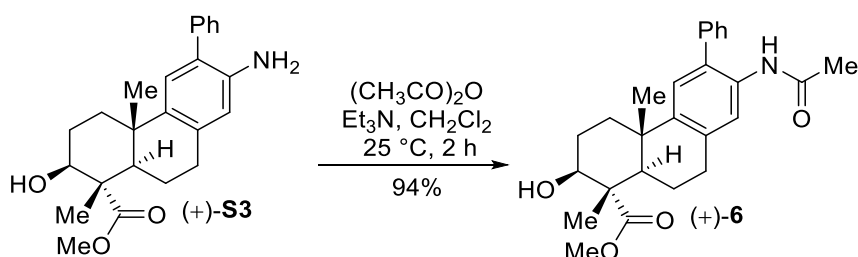

In an oven-dried round-bottom flask, compound (+)-**S3** (500 mg, 1.32 mmol., 1.0 equiv.) was taken in dry  $\text{CH}_2\text{Cl}_2$  (15 mL) and  $\text{Et}_3\text{N}$  (0.55 mL, 3.95 mmol., 3.0 equiv.) was added to the

reaction mixture. Next, acetic anhydride (0.15 mL, 1.58 mmol., 1.2 equiv.) was added to the reaction mixture at 25 °C and stirring continued until the full consumption of starting material. Upon completion (2 h), as monitored by TLC analysis, it was extracted with CH<sub>2</sub>Cl<sub>2</sub> (15 mL X 1). The organic layers were dried over Na<sub>2</sub>SO<sub>4</sub> and concentrated in a rotary evaporator under reduced pressure. The crude product was purified by flash column chromatography with 45% EtOAc in *n*-hexane to afford (+)-**6** as yellow foam (523 mg, 94% yield).

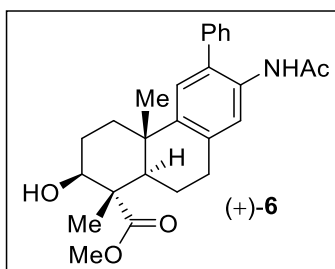

**Methyl (1*S*,2*S*,4*aS*,10*aR*)-7-acetamido-2-hydroxy-1,4*a*-dimethyl-6-phenyl-1,2,3,4,4*a*,9,10,10*a*-octahydrophenanthrene-1-carboxylate [(+)-**6**]:** (+)-**6** was obtained as a yellow foam (1.32 mmol scale, 523 mg, 94% yield); *R*<sub>f</sub> = 0.25 (50% EtOAc in *n*-hexane).

**<sup>1</sup>H NMR** (500 MHz, CDCl<sub>3</sub>) δ 7.89 (s, 1H), 7.49 (t, *J* = 7.4 Hz, 2H), 7.42 (t, *J* = 7.3 Hz, 1H), 7.39 – 7.34 (m, 2H), 7.11 (s, 1H), 7.08 (s, 1H), 4.05 (dd, *J* = 11.6, 4.6 Hz, 1H), 3.75 (s, 3H), 2.97 (pd, *J* = 10.2, 2.7 Hz, 2H), 2.31 (dt, *J* = 13.3, 3.4 Hz, 1H), 2.16 (dd, *J* = 12.5, 2.2 Hz, 1H), 2.03 (s, 3H), 1.97 – 1.92 (m, 1H), 1.91 – 1.85 (m, 1H), 1.80 (qd, *J* = 13.2, 3.2 Hz, 1H), 1.65 (td, *J* = 13.2, 3.9 Hz, 1H), 1.46 (ddd, *J* = 16.2, 8.0, 5.8 Hz, 1H), 1.27 (s, 3H), 1.24 (s, 3H).

**<sup>13</sup>C NMR** (126 MHz, CDCl<sub>3</sub>) δ 177.7, 168.5, 145.3, 138.5, 135.3, 132.0, 130.6, 129.3, 129.0, 127.8, 126.2, 122.2, 75.1, 53.7, 52.3, 45.5, 36.8, 36.6, 30.0, 27.2, 25.2, 24.5, 21.5, 10.7.

**IR** (neat) *ν*<sub>max</sub> 3307, 2987, 2705, 1843, 1757, 1602, 1187, 1059, 915 cm<sup>-1</sup>.

**HRMS** (ESI) *m/z*: [M+ Na]<sup>+</sup> calcd. for [C<sub>26</sub>H<sub>31</sub>O<sub>4</sub>N + Na]<sup>+</sup> 444.2145, found 444.2138.

[α]<sub>D</sub><sup>25</sup><sub>589</sub> = +68.35 (*c* = 0.52, MeOH).

**Buchwald's Oxidative C-N Coupling of (+)-**6**:**



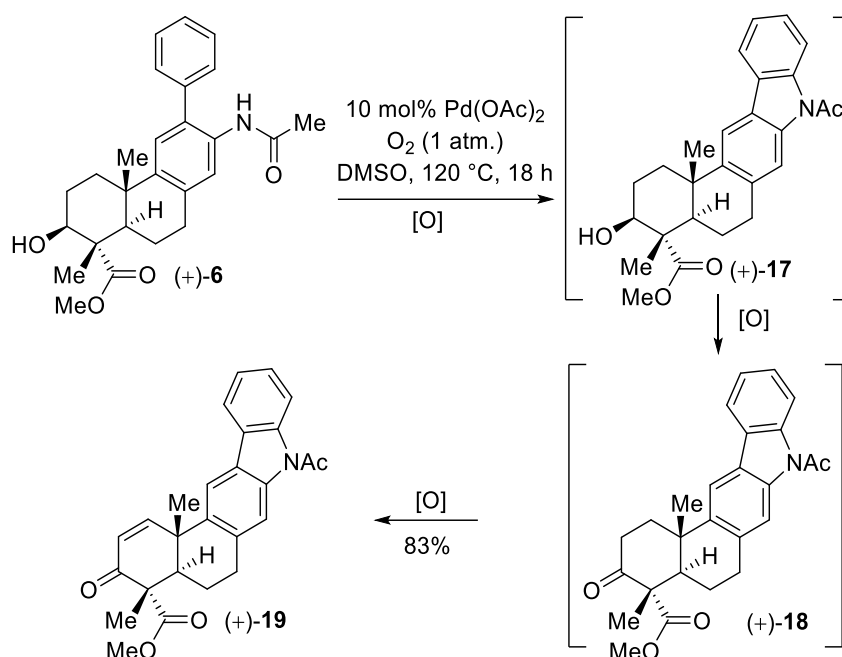

2-Phenyl acetanilide derivative (+)-**6** (350 mg, 0.83 mmol, 1.0 equiv.) was taken in DMSO (6 mL) under argon atmosphere and Pd(OAc)<sub>2</sub> (18.6 mg, 0.083 mmol, 0.1 equiv.) was added to it. The reaction mixture was sonicated and degassed and refilled with O<sub>2</sub> from the double manifold (this sequence was carried out 3 times). The sealed tube was set into a pre-heated oil bath at 120 °C and stirred for 18 h (complete consumption of starting materials). After cooling it to room temperature, the reaction mixture was diluted with water (10 mL) and extracted with 40% EtOAc in *n*-hexane (10 mL X 2). The combined organic layers were dried over anhydrous Na<sub>2</sub>SO<sub>4</sub>, and concentrated in a rotary evaporator under reduced pressure. The residue was purified by silica gel column chromatography with 25% EtOAc in *n*-hexane to afford to provide (+)-**19** as colorless oil (286 mg, 83% yield).

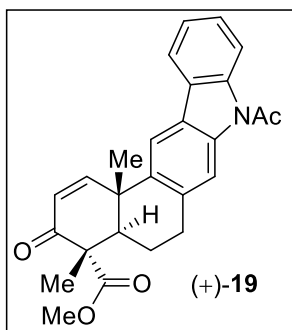

**Methyl (4*S*,4*aR*,13*bS*)-8-acetyl-4,13*b*-dimethyl-3-oxo-4,4*a*,5,6,8,13*b*-hexahydro-3*H*-naphtho[2,1-*b*]carbazole-4-carboxylate [(+)-**19**]:** (+)-**19** was obtained as a colorless oil (0.83 mmol scale, 286 mg, 83% yield); *R*<sub>f</sub> = 0.3 (20% EtOAc in *n*-hexane).

**$^1\text{H}$  NMR** (500 MHz,  $\text{CDCl}_3$ )  $\delta$  8.16 (d,  $J = 8.3$  Hz, 1H), 8.07 (s, 1H), 8.05 – 8.01 (m, 2H), 7.88 (d,  $J = 10.5$  Hz, 1H), 7.50 (ddd,  $J = 8.5, 7.2, 1.4$  Hz, 1H), 7.42 (td,  $J = 7.5, 0.9$  Hz, 1H), 6.22 (d,  $J = 10.4$  Hz, 1H), 3.75 (s, 3H), 3.25 – 3.15 (m, 2H), 3.11 (dd,  $J = 13.0, 2.7$  Hz, 1H), 2.89 (s, 3H), 2.13 (tdd,  $J = 13.2, 10.2, 7.7$  Hz, 1H), 1.72 (ddt,  $J = 10.5, 7.5, 2.8$  Hz, 1H), 1.55 (s, 6H).

**$^{13}\text{C}$  NMR** (125 MHz,  $\text{CDCl}_3$ )  $\delta$  198.1, 173.4, 170.0, 157.1, 139.8, 138.9, 137.6, 135.1, 127.3, 126.2, 124.8, 123.8, 119.6, 117.6, 116.1, 114.7, 58.3, 44.4, 39.9, 30.3, 29.7, 28.0, 27.7, 20.2, 16.6.

**IR** (neat)  $\nu_{\text{max}}$  2890, 2816, 1681, 1422, 1206, 1124, 1009, 789  $\text{cm}^{-1}$ .

**HRMS** (ESI)  $m/z$ :  $[\text{M} + \text{Na}]^+$  calcd. for  $[\text{C}_{26}\text{H}_{25}\text{O}_4\text{N} + \text{Na}]^+$  438.1676, found 438.1645.

$[\alpha]_{\text{D}}^{25} = +62.08$  ( $c = 0.78$ ,  $\text{CHCl}_3$ ).

#### Hydrogenation of Enone (+)-**19**:

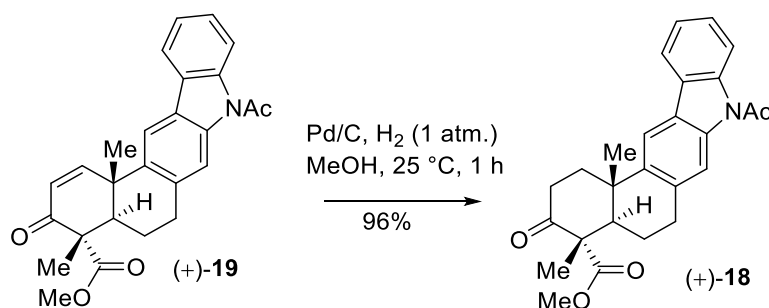

In an oven-dried round-bottom flask under an inert (argon) atmosphere, enone (+)-**19** (152 mg, 0.365 mmol, 1.0 equiv.) was taken in MeOH (4 mL). To this solution, 10% Pd–C (w/w) (15 mg) was added, and purged with nitrogen gas (3 times). Next, a hydrogen balloon (having 1 atm. hydrogen pressure) was connected with the septum. Upon completion of the reaction (confirmed by TLC analysis), the reaction mixture was filtered and purified with 50% EtOAc in *n*-hexane to afford pure keto (+)-**18** as yellow gel (146 mg, 96% yield).

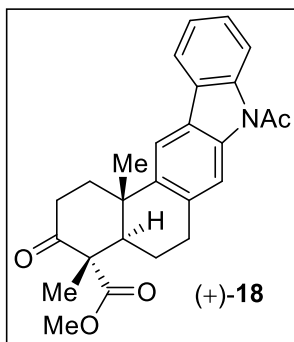

**Methyl (4*S*,4*aR*,13*bS*)-8-acetyl-4,13*b*-dimethyl-3-oxo-2,3,4,4*a*,5,6,8,13*b*-octahydro-1*H*-naphtho[2,1-*b*]carbazole-4-carboxylate [(+)-18]:** (+)-18 was obtained as yellow gel (0.365 mmol scale of reaction, 146 mg of product, 96% yield);  $R_f = 0.28$  (30% EtOAc in *n*-hexane).

**$^1\text{H}$  NMR** (500 MHz,  $\text{CDCl}_3$ )  $\delta$  8.18 (d,  $J = 8.3$  Hz, 1H), 7.99 – 7.96 (m, 2H), 7.91 (s, 1H), 7.47 (ddd,  $J = 8.5, 7.3, 1.4$  Hz, 1H), 7.40 (td,  $J = 7.5, 1.0$  Hz, 1H), 3.77 (s, 3H), 3.21 – 3.12 (m, 2H), 2.93 – 2.89 (m, 1H), 2.88 (s, 3H), 2.80 – 2.73 (m, 2H), 2.24 – 2.15 (m, 1H), 2.01 (tdd,  $J = 12.9, 11.2, 7.0$  Hz, 1H), 1.69 – 1.60 (m, 2H), 1.52 (s, 3H), 1.46 (s, 3H).

**$^{13}\text{C}$  NMR** (125 MHz,  $\text{CDCl}_3$ )  $\delta$  210.2, 173.5, 170.0, 142.9, 138.9, 137.4, 134.7, 127.1, 126.5, 125.1, 123.7, 119.5, 116.5, 116.2, 116.1, 61.0, 52.7, 46.8, 37.3, 36.9, 35.3, 31.4, 27.7, 24.8, 21.5, 16.8.

**IR** (neat)  $\nu_{\text{max}}$  3021, 2798, 1712, 1696, 1665, 1587, 1388, 1102, 885, 714  $\text{cm}^{-1}$ .

**HRMS** (ESI)  $m/z$ :  $[\text{M} + \text{Na}]^+$  calcd. for  $[\text{C}_{26}\text{H}_{27}\text{O}_4\text{N} + \text{Na}]^+$  440.1832, found 440.1852.

$[\alpha]^{25}_{589} = +86.7$  ( $c = 0.68$ ,  $\text{CHCl}_3$ ).

#### Synthesis of *N*-Acetyl Xiamycin A Methyl ester (+)-17:

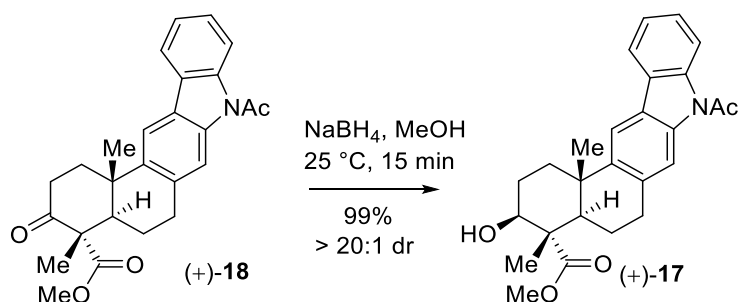

Ketone (+)-**18** (140 mg, 0.335 mmol, 1.0 equiv.) was taken in MeOH (4 mL) at 0 °C, NaBH<sub>4</sub> (14 mg, 0.335 mmol, 1.0 equiv.) was added portion wise and the reaction mixture was stirred at room temperature for 15 min. After complete consumption of starting material (judged by TLC analysis), it was quenched with saturated NH<sub>4</sub>Cl (5 mL) and extracted with EtOAc (5 mL X 2). The organic layers were dried over Na<sub>2</sub>SO<sub>4</sub> and concentrated on a rotary evaporator under reduced pressure. The crude products were purified by flash chromatography with 50% EtOAc in *n*-hexane to afford (+)-**17** as yellow oil (138 mg, 99% yield), *R<sub>f</sub>* = 0.32 (40% EtOAc in *n*-hexane).

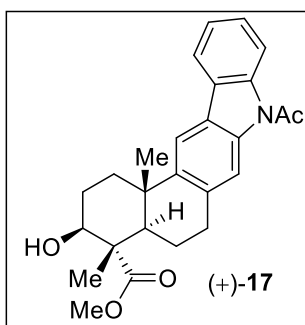

**Methyl (3*S*,4*S*,4*aR*,13*bS*)-8-acetyl-3-hydroxy-4,13*b*-dimethyl-2,3,4,4*a*,5,6,8,13*b*-octahydro-1*H*-naphtho[2,1-*b*] carbazole-4-carboxylate [(+)-**17**]:** (+)-**17** was obtained as yellow oil (0.335 mmol scale, 138 mg, 99% yield); *R<sub>f</sub>* = 0.32 (40% EtOAc in *n*-hexane).

**<sup>1</sup>H NMR** (500 MHz, CDCl<sub>3</sub>) δ 8.19 (d, *J* = 8.4 Hz, 1H), 7.96 (dd, *J* = 7.7, 1.4 Hz, 1H), 7.90 (s, 1H), 7.86 (s, 1H), 7.46 (ddd, *J* = 8.5, 7.3, 1.4 Hz, 1H), 7.38 (td, *J* = 7.5, 0.9 Hz, 1H), 4.11 (dd, *J* = 11.6, 4.5 Hz, 1H), 3.78 (s, 3H), 3.18 – 3.08 (m, 2H), 2.87 (s, 3H), 2.57 (dt, *J* = 12.8, 3.4 Hz, 1H), 2.22 (dd, *J* = 12.6, 2.3 Hz, 1H), 2.07 – 1.96 (m, 2H), 1.93 – 1.88 (m, 1H), 1.81 (dd, *J* = 13.1, 3.7 Hz, 1H), 1.54 (ddt, *J* = 12.5, 7.0, 2.4 Hz, 1H), 1.32 (d, *J* = 3.1 Hz, 6H).

**<sup>13</sup>C NMR** (125 MHz, CDCl<sub>3</sub>) δ 177.7, 170.0, 145.0, 138.9, 137.1, 134.8, 126.9, 126.7, 124.8, 123.6, 119.5, 116.3, 115.3, 75.2, 53.7, 52.3, 45.6, 37.3, 37.03, 31.06, 27.67, 27.29, 25.56, 21.4, 10.8.

**IR** (neat) *ν*<sub>max</sub> 3351, 2823, 1632, 1522, 1470, 1356, 954 cm<sup>-1</sup>.

**HRMS** (ESI) *m/z*: [M+ Na]<sup>+</sup> calcd. for [C<sub>26</sub>H<sub>29</sub>O<sub>4</sub>N + Na]<sup>+</sup> 442.1989, found 442.1984.

[α]<sub>D</sub><sup>25</sup><sub>589</sub> = +85.42 (*c* = 0.69, CHCl<sub>3</sub>).

**Procedure for the synthesis of (+)-20:**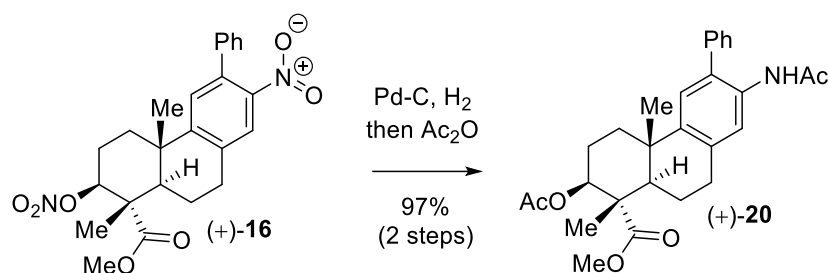

In an oven-dried round-bottom flask, (+)-**16** (2.1 g, 4.62 mmol, 1.0 equiv.) was taken in MeOH (25 mL) under inert atmosphere and degassed with N<sub>2</sub> balloon for 10 minutes. Next, 105 mg of Pd/C (5% w/w) was added to the reaction mixture at 25 °C. Then, H<sub>2</sub> gas was purged constantly at 25 °C using a H<sub>2</sub> gas balloon (1 atm. pressure) until the full consumption of starting material (2 h) [as monitored by TLC analysis]. Next, the reaction mixture was filtered through celite pad and concentrated under the reduced pressure and charged for the next step without purification.

The crude reaction mixture from the above reaction (4.62 mmol., 1 equiv.) was taken in dry CH<sub>2</sub>Cl<sub>2</sub> (25 mL). To the solution was added Et<sub>3</sub>N (1.35 ml, 9.7 mmol., 2.1 equiv.) and catalytic amount of DMAP (57 mg, 0.462 mmol., 0.1 equiv.) at 25 °C. Acetic anhydride (0.92 ml, 9.7 mmol., 2.1 equiv.) was added at 25 °C and it was allowed to stir until the full consumption of starting material (2 h). Upon completion of the reaction (as monitored by TLC analysis), water (20 mL) was added and then extracted with CH<sub>2</sub>Cl<sub>2</sub> (20 mL X 1). The organic layers were separated and dried over Na<sub>2</sub>SO<sub>4</sub> and concentrated on a rotary evaporator under the reduced pressure. The crude bis-acetate was purified by flash column chromatography with 45% EtOAc in *n*-hexane to afford (+)-**20** as yellow foam (2.1 g, 97% yield).

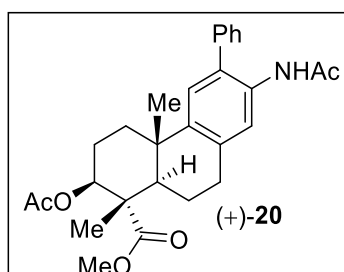

**Methyl (1*S*,2*S*,4*aS*,10*aR*)-7-acetamido-2-acetoxy-1,4*a*-dimethyl-6-phenyl-1,2,3,4,4*a*,9,10,10*a*-octahydrophenanthrene-1-carboxylate [(+)-20]:** (+)-**20** was obtained as a yellow foam (4.65 mmol scale, 2.1 g, 97% yield); *R*<sub>f</sub> = 0.2 (30% EtOAc in *n*-hexane).

**<sup>1</sup>H NMR** (500 MHz, CDCl<sub>3</sub>)  $\delta$  7.91 (s, 1H), 7.49 (t,  $J$  = 7.4 Hz, 2H), 7.43 (d,  $J$  = 7.3 Hz, 1H), 7.38 – 7.33 (m, 2H), 7.11 (s, 1H), 7.04 (s, 1H), 5.24 (dd,  $J$  = 11.5, 4.5 Hz, 1H), 3.70 (s, 3H), 2.97 (dtd,  $J$  = 21.0, 10.9, 10.2, 6.6 Hz, 2H), 2.35 – 2.26 (m, 2H), 2.03 (s, 6H), 2.00 – 1.90 (m, 3H), 1.82 (dd,  $J$  = 12.4, 3.0 Hz, 1H), 1.76 (dd,  $J$  = 12.8, 3.1 Hz, 1H), 1.44 – 1.40 (m, 1H), 1.33 (s, 3H), 1.26 (s, 3H).

**<sup>13</sup>C NMR** (125 MHz, CDCl<sub>3</sub>)  $\delta$  176.3, 170.1, 168.3, 144.9, 138.5, 135.2, 132.2, 129.3, 129.0, 127.8, 126.1, 122.0, 52.4, 52.1, 45.6, 36.7, 36.3, 29.9, 29.7, 25.1, 24.5, 24.0, 21.1, 21.1, 11.7.

**IR** (neat)  $\nu_{\max}$  2987, 2745, 1823, 1745, 1605, 1178, 1095, 965, cm<sup>-1</sup>.

**HRMS** (ESI)  $m/z$ : [M+ Na]<sup>+</sup> calcd. for [C<sub>28</sub>H<sub>33</sub>O<sub>5</sub>N + Na]<sup>+</sup> 486.2251, found 486.2283.

$[\alpha]_{589}^{25}$  = +94.0 ( $c$  = 0.87, MeOH).

#### Buchwald's Oxidative C–N bond formation of (+)-20:

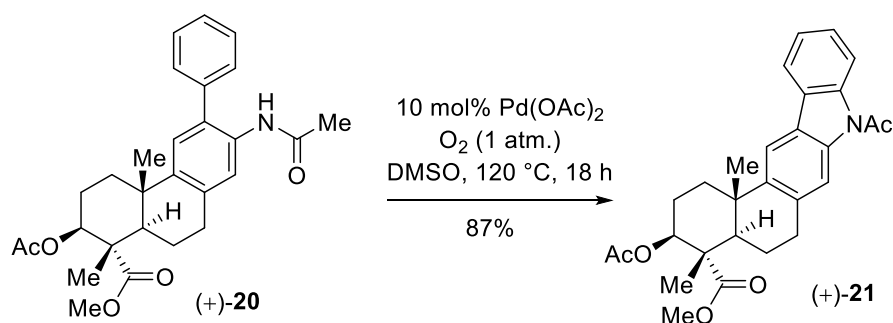

2-Phenyl acetanilide derivative (+)-20 (300 mg, 0.65 mmol, 1.0 equiv.) was taken in DMSO (6 mL) under argon atmosphere and Pd(OAc)<sub>2</sub> (15 mg, 0.065 mmol, 0.1 equiv.) was added to it. The reaction mixture was sonicated and degassed and refilled with O<sub>2</sub> from the double manifold (this sequence was carried out 3 times). The sealed tube was set into a pre-heated oil bath at 120 °C and stirred for 18 h (complete consumption of starting materials). After cooling it to room temperature, the reaction mixture was diluted with water (15 mL) and extracted with 50% EtOAc in *n*-hexane (15 mL X 2). The combined organic layers were dried over anhydrous Na<sub>2</sub>SO<sub>4</sub>, and concentrated in a rotary evaporator under reduced pressure. The residue was purified by silica gel column chromatography with 25% EtOAc in *n*-hexane to

afford to provide (+)-**21** as white foam (259 mg, 87% yield). Later, compound (+)-**21** was prepared in 1.8 g following several batches.

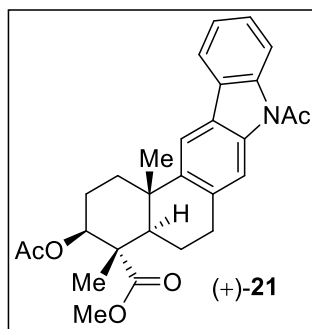

**Methyl** (3*S*,4*S*,4*aR*,13*bS*)-**3-acetoxy-8-acetyl-4,13b-dimethyl-2,3,4,4a,5,6,8,13b-octahydro-1H-naphtho[2,1-*b*]carbazole-4-carboxylate** [(+)-**21**]: (+)-**21** was obtained as a white foam (0.65 mmol scale, 259 mg, 87% yield);  $R_f = 0.25$  (20% EtOAc in *n*-hexane).

**$^1\text{H}$  NMR** (400 MHz,  $\text{CDCl}_3$ )  $\delta$  8.15 (d,  $J = 8.4$  Hz, 1H), 7.95 – 7.91 (m, 1H), 7.87 (s, 1H), 7.82 (s, 1H), 7.45 – 7.40 (m, 1H), 7.35 (t,  $J = 7.6$  Hz, 1H), 5.30 – 5.21 (m, 1H), 3.68 (s, 3H), 3.13 – 3.04 (m, 2H), 2.83 (s, 3H), 2.59 – 2.50 (m, 1H), 2.30 (dd,  $J = 12.8, 2.4$  Hz, 1H), 2.07 – 2.02 (m, 1H), 2.01 (s, 3H), 2.00 – 1.92 (m, 1H), 1.91 – 1.82 (m, 2H), 1.48 – 1.41 (m, 1H), 1.34 (s, 3H), 1.30 (s, 3H).

**$^{13}\text{C}$  NMR** (100 MHz,  $\text{CDCl}_3$ )  $\delta$  176.5, 170.2, 170.1, 144.8, 138.9, 137.2, 134.8, 127.0, 126.8, 124.9, 123.7, 119.6, 116.4, 115.3, 76.9, 52.5, 52.2, 45.8, 37.2, 36.8, 31.0, 27.8, 25.5, 24.2, 21.3, 21.2, 11.8.

**IR** (neat)  $\nu_{\text{max}}$  3257, 2130, 1703, 1653, 1507, 1152, 965, 795  $\text{cm}^{-1}$ .

**HRMS** (ESI)  $m/z$ :  $[\text{M} + \text{Na}]^+$  calcd. for  $[\text{C}_{28}\text{H}_{31}\text{O}_5\text{N} + \text{Na}]^+$  484.2094, found 484.2055.

$[\alpha]^{25}_{589} = +56.7$  ( $c = 0.93$ ,  $\text{CHCl}_3$ ).

**Total Synthesis of (+)-Xiamycin A Methyl Ester [(+)-**2b**]:**

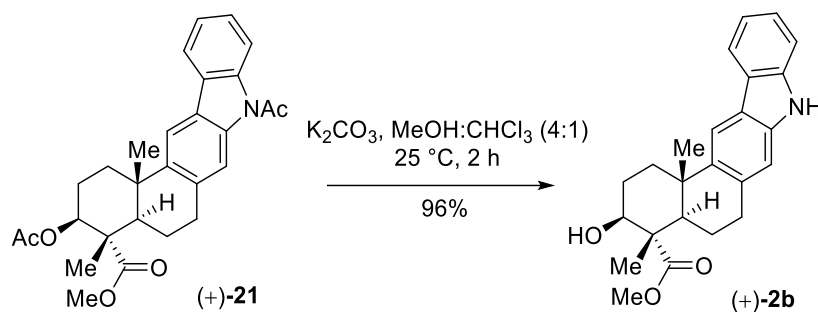

In an oven dried round-bottom flask, (+)-**21** (780 mg, 1.69 mmol, 1.0 equiv.) was taken in a mixture of methanol and chloroform [MeOH: CHCl<sub>3</sub> (4:1)] solvent (15 mL). To this solution was added K<sub>2</sub>CO<sub>3</sub> (934 mg, 6.76 mmol, 4.0 equiv.) at 25 °C and stirring was continued for an additional 2 h. After completion of the reaction (judged by TLC analysis), the reaction mixture was diluted with water (10 mL). Next, it was extracted with dichloromethane (10 mL X 2). The organic layers were dried over Na<sub>2</sub>SO<sub>4</sub> and concentrated on a rotary evaporator under reduced pressure. Next, the crude methyl ester was purified by flash column chromatography with 30% EtOAc in *n*-hexane to afford the naturally occurring xiamycin A methylester (+)-**2b** as a white foam (612 mg, 96% yield).

Synthesis of xiamycin A methylester (+)-**2b** from (+)-**17**:

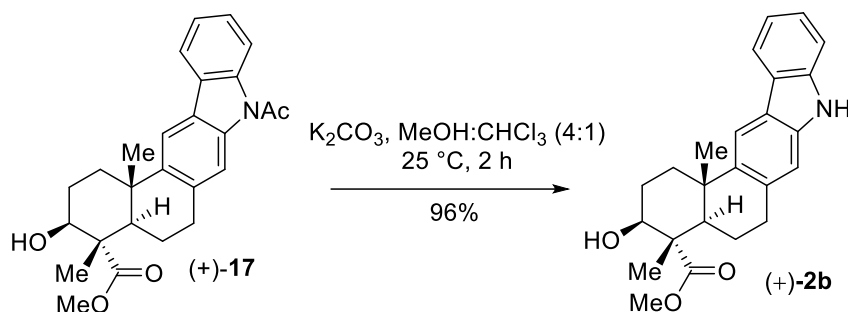

In an oven dried round-bottom flask (+)-**17** (387 mg, 0.922 mmol, 1.0 equiv.) was taken in a mixture of methanol and chloroform [MeOH: CHCl<sub>3</sub> (4:1)] solvent (8 mL). To this solution was added K<sub>2</sub>CO<sub>3</sub> (510 mg, 3.69 mmol, 4.0 equiv.) at 25 °C and stirring was continued for an additional 2 h. After completion of the reaction (judged by TLC analysis), the reaction mixture was diluted with water. Next, it was extracted with dichloromethane. The organic layers were dried over Na<sub>2</sub>SO<sub>4</sub> and concentrated on a rotary evaporator under reduced pressure. The crude methyl ester was purified by flash column chromatography with 35% EtOAc in *n*-hexane to



afford the naturally occurring xiamycin A methylester (+)-**2b** as a white foam (334 mg, 96% yield).

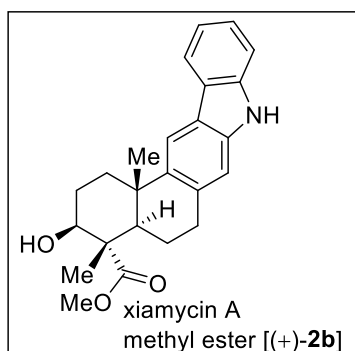

**Methyl (3*S*,4*S*,4*a**R*,13*b**S*)-3-hydroxy-4,13*b*-dimethyl-2,3,4,4*a*,5,6,8,13*b*-octahydro-1*H*-naphtho[2,1-*b*]carbazole-4-carboxylate [(+)-**2b**]:** Natural product xiamycin A methylester (+)-**2b** was obtained as white foam (1.69 mmol scale, 612 mg, 96% yield).  $R_f = 0.2$  (30% EtOAc in *n*-hexane)

**$^1\text{H}$  NMR** (500 MHz,  $\text{CD}_3\text{OD}$ )  $\delta$  8.00 (d,  $J = 7.8$  Hz, 1H), 7.95 (s, 1H), 7.37 (d,  $J = 8.0$  Hz, 1H), 7.31 (t,  $J = 7.6$  Hz, 1H), 7.11 (t,  $J = 7.5$  Hz, 1H), 7.07 (s, 1H), 4.08 (dd,  $J = 9.4, 6.9$  Hz, 1H), 3.73 (s, 3H), 3.10 (dd,  $J = 17.0, 6.8$  Hz, 1H), 3.06 – 2.96 (m, 1H), 2.64 (dq,  $J = 13.3, 3.3$  Hz, 1H), 2.18 – 2.11 (m, 1H), 2.04 (ddt,  $J = 20.0, 9.7, 5.9$  Hz, 1H), 1.91 (td,  $J = 10.6, 9.6, 5.5$  Hz, 2H), 1.74 (td,  $J = 12.6, 11.8, 4.6$  Hz, 1H), 1.40 (ddd,  $J = 13.6, 7.5, 2.0$  Hz, 1H), 1.30 (s, 3H), 1.28 (s, 3H).

**$^{13}\text{C}$  NMR** (125 MHz,  $\text{CD}_3\text{OD}$ )  $\delta$  179.6, 141.9, 141.6, 140.1, 133.8, 125.9, 124.6, 123.0, 120.5, 119.3, 116.2, 111.4, 110.7, 76.2, 55.4, 52.5, 47.9, 38.8, 38.3, 31.8, 28.4, 26.2, 22.5, 11.2.

**IR** (neat)  $\nu_{\text{max}}$  3389, 2930, 2866, 1710, 1602, 1455, 1243, 915, 788, 540  $\text{cm}^{-1}$ .

**HRMS** (ESI)  $m/z$ :  $[\text{M} + \text{Na}]^+$  calcd. for  $[\text{C}_{24}\text{H}_{27}\text{O}_3\text{N} + \text{Na}]^+$  400.1883, found 400.1885.

$[\alpha]_{589}^{25} = +112.6$  ( $c = 0.79$ ,  $\text{CH}_3\text{OH}$ ); lit.<sup>[3]</sup>  $[\alpha]_{\text{D}}^{21} = +162.4$  ( $c = 1.3$ ,  $\text{CH}_3\text{OH}$ ).

**Comparison of  $^1\text{H}$ -NMR Data of (+)-Xiamycin A methylester [(+)-**2b**] of this report with natural (+)-**2b** by Hertweck<sup>[3]</sup>:**

| Hertweck's isolation of (+)-xiamycin A methyl ester [(+)- <b>2b</b> ]<br>( <sup>1</sup> H-NMR, 300 MHz, CD <sub>3</sub> OD) <sup>[3]</sup> |      |       |                               |
|--------------------------------------------------------------------------------------------------------------------------------------------|------|-------|-------------------------------|
| δ (ppm)                                                                                                                                    | Int. | mult. | <i>J</i> (Hz)                 |
| 7.96                                                                                                                                       | 1H   | dd    | <i>J</i> = 7.7, 1.1 Hz        |
| 7.92                                                                                                                                       | 1H   | s     | -                             |
| 7.34                                                                                                                                       | 1H   | dd    | <i>J</i> = 8.0, 1.1 Hz        |
| 7.27                                                                                                                                       | 1H   | ddd   | <i>J</i> = 8.0, 7.4, 1.1 Hz   |
| 7.08                                                                                                                                       | 1H   | ddd   | <i>J</i> = 8.1, 7.3, 1.1 Hz   |
| 7.05                                                                                                                                       | 1H   | s     | -                             |
| 4.05                                                                                                                                       | 1H   | dd    | <i>J</i> = 9.1, 7.1 Hz        |
| 3.71                                                                                                                                       | 3H   | s     | -                             |
| 3.09                                                                                                                                       | 1H   | dd    | <i>J</i> = 16.7, 6.1          |
| 2.98                                                                                                                                       | 1H   | m     | -                             |
| 2.61                                                                                                                                       | 1H   | td    | <i>J</i> = 13.1, 3.0 Hz       |
| 2.13                                                                                                                                       | 1H   | dd    | <i>J</i> = 12.5, 2.0 Hz       |
| 2.00                                                                                                                                       | 1H   | ddd   | <i>J</i> = 13.4, 12.8, 7.0 Hz |
| 1.88                                                                                                                                       | 2H   | m     | -                             |
| 1.74                                                                                                                                       | 1H   | m     | -                             |
| 1.38                                                                                                                                       | 1H   | m     | -                             |
| 1.29                                                                                                                                       | 3H   | s     | -                             |
| 1.23                                                                                                                                       | 3H   | s     | -                             |

| This Synthesis: (+)-xiamycin A methyl ester [(+)- <b>2b</b> ]<br>( <sup>1</sup> H-NMR, 500 MHz, CD <sub>3</sub> OD) |      |       |                   |
|---------------------------------------------------------------------------------------------------------------------|------|-------|-------------------|
| δ (ppm)                                                                                                             | Int. | mult. | <i>J</i> (Hz)     |
| 8.00                                                                                                                | 1H   | d     | <i>J</i> = 7.8 Hz |
| 7.95                                                                                                                | 1H   | s     | -                 |
| 7.37                                                                                                                | 1H   | d     | <i>J</i> = 8.0 Hz |
| 7.31                                                                                                                | 1H   | t     | <i>J</i> = 7.6 Hz |
| 7.11                                                                                                                | 1H   | t     | <i>J</i> = 7.5 Hz |
| 7.07                                                                                                                | 1H   | s     | -                 |

|             |    |     |                                  |
|-------------|----|-----|----------------------------------|
| 4.08        | 1H | dd  | $J = 9.4, 6.9 \text{ Hz}$        |
| 3.73        | 3H | s   | -                                |
| 3.10        | 1H | dd  | $J = 17.0, 6.8 \text{ Hz}$       |
| 3.06 – 2.96 | 1H | m   | -                                |
| 2.64        | 1H | dq  | $J = 13.3, 3.3 \text{ Hz}$       |
| 2.18 – 2.11 | 1H | m   | -                                |
| 2.04        | 1H | ddt | $J = 20.0, 9.7, 5.9 \text{ Hz}$  |
| 1.91        | 2H | td  | $J = 10.6, 9.6, 5.5 \text{ Hz}$  |
| 1.74        | 1H | td  | $J = 12.6, 11.8, 4.6 \text{ Hz}$ |
| 1.40        | 1H | ddd | $J = 13.6, 7.5, 2.0 \text{ Hz}$  |
| 1.30        | 3H | s   | -                                |
| 1.28        | 3H | s   | -                                |

### Comparison of $^{13}\text{C}$ -NMR Data:

| Hertweck's report on isolation of (+)-xiamycin A methyl ester [(+)- <b>2b</b> ]<br>( $^{13}\text{C}$ -NMR, 125.76 MHz, $\text{CD}_3\text{OD}$ ) <sup>[3]</sup> | This Synthesis: (+)-xiamycin A methyl ester [(+)- <b>2b</b> ]<br>( $^{13}\text{C}$ -NMR, 125 MHz, $\text{CD}_3\text{OD}$ ) |
|----------------------------------------------------------------------------------------------------------------------------------------------------------------|----------------------------------------------------------------------------------------------------------------------------|
| 179.8                                                                                                                                                          | 179.6                                                                                                                      |
| 142.0                                                                                                                                                          | 141.9                                                                                                                      |
| 141.8                                                                                                                                                          | 141.6                                                                                                                      |
| 140.2                                                                                                                                                          | 140.1                                                                                                                      |
| 133.9                                                                                                                                                          | 133.8                                                                                                                      |
| 126.1                                                                                                                                                          | 125.9                                                                                                                      |
| 124.6                                                                                                                                                          | 124.6                                                                                                                      |
| 123.1                                                                                                                                                          | 123.0                                                                                                                      |
| 120.5                                                                                                                                                          | 120.5                                                                                                                      |
| 119.4                                                                                                                                                          | 119.3                                                                                                                      |
| 116.3                                                                                                                                                          | 116.2                                                                                                                      |
| 111.5                                                                                                                                                          | 111.4                                                                                                                      |
| 110.8                                                                                                                                                          | 110.7                                                                                                                      |

|      |      |
|------|------|
| 76.3 | 76.2 |
| 55.4 | 55.4 |
| 52.6 | 52.5 |
| 48.1 | 47.9 |
| 39.0 | 38.8 |
| 38.4 | 38.3 |
| 31.9 | 31.8 |
| 28.5 | 28.4 |
| 26.3 | 26.2 |
| 22.6 | 22.5 |
| 11.3 | 11.2 |

### Total Synthesis of Xiamycin A [(+)-**2a**]:

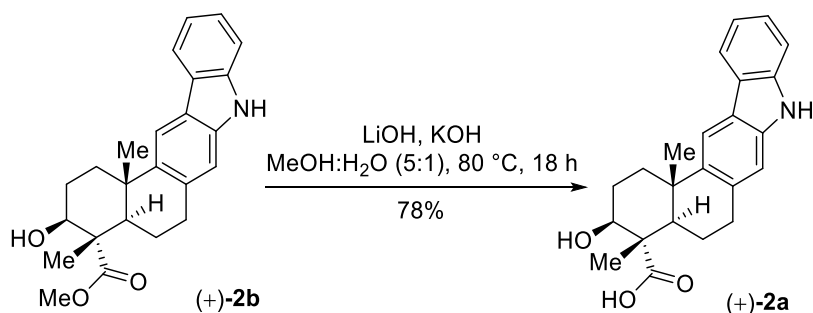

In an oven dried round-bottom flask xiamycin A methyl ester [(+)-**2b**] (58 mg, 0.153 mmol, 1.0 equiv.) was taken in a mixture of methanol and water [MeOH: H<sub>2</sub>O (5:1)] at 25 °C. Next, KOH (259 mg, 4.61 mmol, 30 equiv.) and LiOH (128 mg, 3.06 mmol, 20 equiv.) were added subsequently and the reaction mixture was heated under reflux at 80 °C. After completion of the reaction as confirmed by TLC analysis (18 h), the reaction mixture was quenched with 6(*N*) HCl at 0 °C and the pH of the reaction mixture was adjusted to ~1-2. Then whole reaction mixture was extracted with EtOAc (8 mL X 2). The combined organic layers were collected, dried over Na<sub>2</sub>SO<sub>4</sub> and concentrated under reduced pressure. The crude product was purified by flash column chromatography with ~80-90% EtOAc to afford the naturally occurring xiamycin A [(+)-**2a**] as white foam (43 mg, 78% yield).

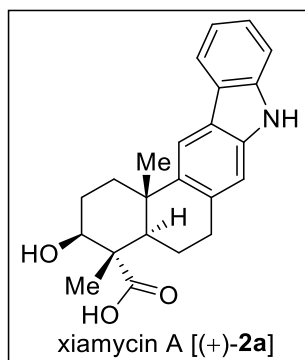

(3*S*,4*S*,4*aR*,13*bS*)-**3-Hydroxy-4,13b-dimethyl-2,3,4,4a,5,6,8,13b-octahydro-1H-naphtho[2,1-*b*]carbazole-4-carboxylic acid [(+)-2a**]: Natural product xiamycin A [(+)-2a] was obtained as white foam (0.153 mmol scale, 43 mg, 78% yield).  $R_f = 0.2$  (70% EtOAc in *n*-hexane).

**$^1\text{H}$  NMR** (500 MHz,  $\text{CD}_3\text{OD}$ ):  $\delta$  8.00 (d,  $J = 7.8$  Hz, 1H), 7.96 (s, 1H), 7.37 (d,  $J = 8.0$  Hz, 1H), 7.31 (t,  $J = 7.6$  Hz, 1H), 7.12 (d,  $J = 7.5$  Hz, 1H), 7.09 (s, 1H), 4.12 (dd,  $J = 9.4, 7.0$  Hz, 1H), 3.13 (dd,  $J = 16.9, 6.7$  Hz, 1H), 3.05 (ddd,  $J = 17.3, 11.0, 7.4$  Hz, 1H), 2.64 (dd,  $J = 13.2, 3.6$  Hz, 1H), 2.18 (d,  $J = 12.4$  Hz, 1H), 2.04 (qd,  $J = 12.3, 7.2$  Hz, 1H), 1.92 (dt,  $J = 10.7, 5.5$  Hz, 2H), 1.81 – 1.73 (m, 1H), 1.57 (dd,  $J = 13.3, 7.4$  Hz, 1H), 1.32 (s, 3H), 1.27 (s, 3H).

**$^{13}\text{C}$  NMR** (125 MHz,  $\text{CD}_3\text{OD}$ ):  $\delta$  181.3, 142.0, 141.8, 140.1, 134.0, 126.0, 124.6, 123.1, 120.5, 119.3, 116.3, 111.4, 110.8, 76.3, 54.9, 47.9, 38.9, 38.3, 31.9, 28.6, 26.3, 22.6, 11.4.

**IR** (neat)  $\nu_{\text{max}}$  3350, 2935, 2263, 1670, 1415, 1013, 917, 837  $\text{cm}^{-1}$ .

**HRMS** (ESI)  $m/z$ :  $[\text{M} + \text{Na}]^+$  calcd. for  $[\text{C}_{23}\text{H}_{25}\text{O}_3\text{N} + \text{Na}]^+$  386.1727, found 386.1717.

$[\alpha]^{25}_{589} = +107$  ( $c = 0.69$ ,  $\text{CH}_3\text{OH}$ ); lit.<sup>[3]</sup>  $[\alpha]_{\text{D}}^{21} = +137.6$  ( $c = 5.3$ ,  $\text{CH}_3\text{OH}$ ).

**Comparison of  $^1\text{H}$ -NMR Data of (+)-Xiamycin A [(+)-2a]** of this report with natural (+)-2a by Hertweck<sup>[3]</sup> and with literature by Baran<sup>[4]</sup> and Sarpong<sup>[5]</sup>:

| Hertweck's report on isolation of (+)-Xiamycin A [(+)-2a]<br>( $^1\text{H}$ -NMR, 300 MHz, $\text{CD}_3\text{OD}$ ) <sup>[3]</sup> |      |       |          |
|------------------------------------------------------------------------------------------------------------------------------------|------|-------|----------|
| $\delta$ (ppm)                                                                                                                     | Int. | mult. | $J$ (Hz) |

|      |    |     |                                  |
|------|----|-----|----------------------------------|
| 7.96 | 1H | dd  | $J = 7.7, 1.1 \text{ Hz}$        |
| 7.92 | 1H | s   | -                                |
| 7.34 | 1H | dd  | $J = 8.0, 1.1 \text{ Hz}$        |
| 7.27 | 1H | ddd | $J = 8.0, 7.4, 1.1 \text{ Hz}$   |
| 7.08 | 1H | ddd | $J = 8.1, 7.3, 1.1 \text{ Hz}$   |
| 7.05 | 1H | s   | -                                |
| 4.09 | 1H | dd  | $J = 9.1, 7.1 \text{ Hz}$        |
| 3.09 | 1H | dd  | $J = 16.7, 6.1$                  |
| 3.02 | 1H | m   | -                                |
| 2.61 | 1H | td  | $J = 13.1, 3.0 \text{ Hz}$       |
| 2.15 | 1H | dd  | $J = 12.5, 2.0 \text{ Hz}$       |
| 2.00 | 1H | ddd | $J = 13.4, 12.8, 7.0 \text{ Hz}$ |
| 1.89 | 2H | m   | -                                |
| 1.74 | 1H | m   | -                                |
| 1.53 | 1H | m   | -                                |
| 1.29 | 3H | s   | -                                |
| 1.23 | 3H | s   | -                                |

| Baran's Total Synthesis of (+)-Xiamycin A [(+)- <b>2a</b> ] ( $^1\text{H}$ -NMR, 600 MHz, $\text{CD}_3\text{OD}$ ) <sup>[4]</sup> |      |       |                                |
|-----------------------------------------------------------------------------------------------------------------------------------|------|-------|--------------------------------|
| $\delta$ (ppm)                                                                                                                    | Int. | mult. | $J$ (Hz)                       |
| 7.97                                                                                                                              | 1H   | dt    | $J = 7.8, 1.0 \text{ Hz}$      |
| 7.94                                                                                                                              | 1H   | s     | -                              |
| 7.35                                                                                                                              | 1H   | dt    | $J = 8.1, 0.9 \text{ Hz}$      |
| 7.29                                                                                                                              | 1H   | ddd   | $J = 8.1, 7.1, 1.2 \text{ Hz}$ |
| 7.09                                                                                                                              | 1H   | t     | $J = 7.9, 7.1, 1.0 \text{ Hz}$ |
| 7.06                                                                                                                              | 1H   | s     | -                              |
| 4.10                                                                                                                              | 1H   | dd    | $J = 9.3, 7.1 \text{ Hz}$      |
| 3.14 – 3.07                                                                                                                       | 1H   | m     | -                              |
| 3.06 – 2.98                                                                                                                       | 1H   | m     | -                              |
| 2.63                                                                                                                              | 1H   | dt    | $J = 13.1, 3.5 \text{ Hz}$     |

|             |    |     |                       |
|-------------|----|-----|-----------------------|
| 2.16        | 1H | dd  | $J = 12.6, 2.2$ Hz    |
| 2.01        | 1H | tdd | $J = 12.8, 11.3, 6.9$ |
| 1.94 – 1.86 | 2H | m   | -                     |
| 1.78 – 1.70 | 1H | m   | -                     |
| 1.57 – 1.52 | 1H | m   | -                     |
| 1.29        | 3H | s   | -                     |
| 1.24        | 3H | s   | -                     |

| Sarpong's Total Synthesis of (+)-Xiamycin A [(+)- <b>2a</b> ]<br>( <sup>1</sup> H-NMR, 700 MHz, CD <sub>3</sub> OD) <sup>[5]</sup> |      |       |                    |
|------------------------------------------------------------------------------------------------------------------------------------|------|-------|--------------------|
| δ (ppm)                                                                                                                            | Int. | mult. | $J$ (Hz)           |
| 7.97                                                                                                                               | 1H   | d     | $J = 8.0$ Hz       |
| 7.94                                                                                                                               | 1H   | s     | -                  |
| 7.35                                                                                                                               | 1H   | d     | $J = 8.0$ Hz       |
| 7.29                                                                                                                               | 1H   | t     | $J = 7.9$ Hz       |
| 7.09                                                                                                                               | 1H   | t     | $J = 7.5$ Hz       |
| 7.07                                                                                                                               | 1H   | s     | -                  |
| 4.10                                                                                                                               | 1H   | dd    | $J = 10.5, 7.5$ Hz |
| 3.15-3.08                                                                                                                          | 1H   | m     | -                  |
| 3.08-2.99                                                                                                                          | 1H   | m     | -                  |
| 2.64                                                                                                                               | 1H   | d     | $J = 12.8$ Hz      |
| 2.14                                                                                                                               | 1H   | d     | $J = 11.8$ Hz      |
| 2.08-1.98                                                                                                                          | 1H   | m     | -                  |
| 1.93-1.88                                                                                                                          | 2H   | m     | -                  |
| 1.78-1.72                                                                                                                          | 1H   | m     | -                  |
| 1.58-1.53                                                                                                                          | 1H   | m     | -                  |
| 1.30                                                                                                                               | 3H   | s     | -                  |
| 1.25                                                                                                                               | 3H   | s     | -                  |

| This Synthesis: (+)-Xiamycin A [(+)- <b>2a</b> ]<br>( <sup>1</sup> H-NMR, 500 MHz, CD <sub>3</sub> OD) |      |       |          |
|--------------------------------------------------------------------------------------------------------|------|-------|----------|
| δ (ppm)                                                                                                | Int. | mult. | $J$ (Hz) |

|           |    |     |                          |
|-----------|----|-----|--------------------------|
| 8.00      | 1H | d   | $J = 7.8$ Hz             |
| 7.96      | 1H | s   | -                        |
| 7.37      | 1H | d   | $J = 8.0$ Hz,            |
| 7.31      | 1H | t   | $J = 7.6$ Hz,            |
| 7.12      | 1H | d   | $J = 7.5$ Hz             |
| 7.09      | 1H | s   | -                        |
| 4.12      | 1H | dd  | $J = 9.4, 7.0$ Hz        |
| 3.13      | 1H | dd  | $J = 16.9, 6.7$ Hz       |
| 3.05      | 1H | ddd | $J = 17.3, 11.0, 7.4$ Hz |
| 2.64      | 1H | dd  | $J = 13.2, 3.6$ Hz       |
| 2.18      | 1H | d   | $J = 12.4$ Hz            |
| 2.04      | 1H | qd  | $J = 12.3, 7.2$ Hz       |
| 1.92      | 2H | dt  | $J = 10.7, 5.5$ Hz       |
| 1.81-1.73 | 1H | m   | -                        |
| 1.57      | 1H | dd  | $J = 13.3, 7.4$ Hz       |
| 1.32      | 3H | s   | -                        |
| 1.27      | 3H | s   | -                        |

### Comparison of $^{13}\text{C}$ -NMR Data:

| Hertweck's isolation of<br>(+)-Xiamycin A [(+)- <b>2a</b> ]<br>( $^{13}\text{C}$ -NMR, 125.77<br>MHz, $\text{CD}_3\text{OD}$ ) <sup>[3]</sup> | Baran's Synthesis:<br>(+)-Xiamycin A [(+)- <b>2a</b> ]<br>( $^{13}\text{C}$ -NMR, 151<br>MHz, $\text{CD}_3\text{OD}$ ) <sup>[4]</sup> | Sarpong's Synthesis:<br>(+)-Xiamycin A [(+)- <b>2a</b> ]<br>( $^{13}\text{C}$ -NMR, 176<br>MHz, $\text{CD}_3\text{OD}$ ) <sup>[5]</sup> | This Synthesis: (+)-<br>Xiamycin A [(+)- <b>2a</b> ]<br>( $^{13}\text{C}$ -NMR, 125<br>MHz, $\text{CD}_3\text{OD}$ ) |
|-----------------------------------------------------------------------------------------------------------------------------------------------|---------------------------------------------------------------------------------------------------------------------------------------|-----------------------------------------------------------------------------------------------------------------------------------------|----------------------------------------------------------------------------------------------------------------------|
| 181.3                                                                                                                                         | 181.4                                                                                                                                 | 181.3                                                                                                                                   | 181.3                                                                                                                |
| 142.0                                                                                                                                         | 142.0                                                                                                                                 | 142.0                                                                                                                                   | 142.0                                                                                                                |
| 141.8                                                                                                                                         | 141.8                                                                                                                                 | 141.8                                                                                                                                   | 141.8                                                                                                                |
| 140.1                                                                                                                                         | 140.1                                                                                                                                 | 140.1                                                                                                                                   | 140.1                                                                                                                |
| 134.0                                                                                                                                         | 134.0                                                                                                                                 | 134.0                                                                                                                                   | 134.0                                                                                                                |
| 126.0                                                                                                                                         | 126.1                                                                                                                                 | 126.0                                                                                                                                   | 126.0                                                                                                                |
| 124.7                                                                                                                                         | 124.7                                                                                                                                 | 124.6                                                                                                                                   | 124.6                                                                                                                |



|       |       |       |       |
|-------|-------|-------|-------|
| 123.1 | 123.1 | 123.1 | 123.1 |
| 120.5 | 120.6 | 120.6 | 120.5 |
| 119.3 | 119.3 | 119.3 | 119.3 |
| 116.3 | 116.4 | 116.4 | 116.3 |
| 111.5 | 111.4 | 111.4 | 111.4 |
| 110.8 | 110.8 | 110.8 | 110.8 |
| 76.3  | 76.3  | 76.3  | 76.3  |
| 54.9  | 54.9  | 54.9  | 54.9  |
| 47.9  | 47.9  | 47.9  | 47.9  |
| 39.0  | 39.0  | 39.0  | 38.9  |
| 38.3  | 38.3  | 38.3  | 38.3  |
| 32.0  | 32.0  | 32.1  | 31.9  |
| 28.6  | 28.6  | 28.7  | 28.6  |
| 26.3  | 26.3  | 26.3  | 26.3  |
| 22.6  | 22.6  | 22.6  | 22.6  |
| 11.4  | 11.4  | 11.4  | 11.4  |

### Synthesis of Xiamycin A methyl ester TMS ether [(+)-22]:

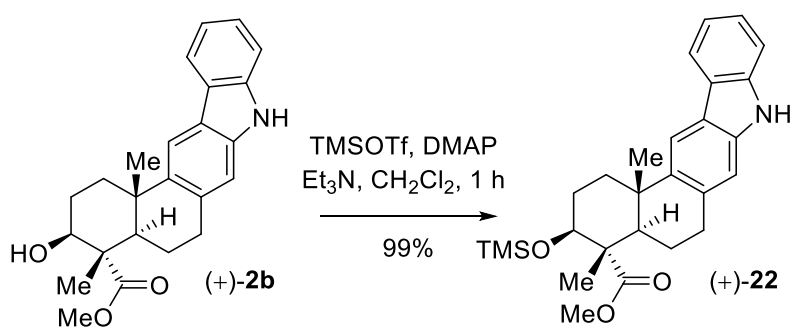

Xiamycin A methyl ester [(+)-**2b**] (1.1 g, 2.91 mmol., 1 equiv.) was taken in dry CH<sub>2</sub>Cl<sub>2</sub> (12 mL) at 25 °C. Triethylamine (0.943 ml, 7.27 mmol., 2.5 equiv.) was added to the reaction mixture followed by the addition of catalytic amount of DMAP (36 mg, 0.291 mmol., 0.1 equiv.) at the same temperature. Next, TMSOTf (0.633 ml, 3.49 mmol., 1.2 equiv.) was added to it at 25 °C and stirring was continued until the complete consumption of starting material. Upon completion of the reaction (judged by TLC analysis), water (10 mL) was added to the reaction mixture and extracted with CH<sub>2</sub>Cl<sub>2</sub> (10 mL X 2). The combined organic layers were

dried over  $\text{Na}_2\text{SO}_4$  and concentrated under reduced pressure and purified by flash column chromatography with 10% EtOAc in *n*-hexane to afford xiamycin A methyl ester TMS ether (+)-**22** as yellow foam (1.29 g, 99% yield).

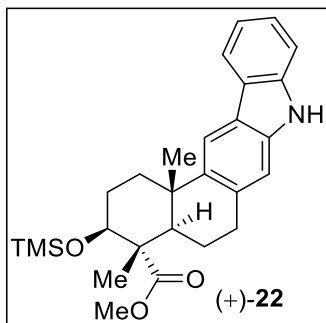

**Methyl (3*S*,4*S*,4*aR*,13*bS*)-4,13*b*-dimethyl-3-((trimethylsilyl)oxy)-2,3,4,4*a*,5,6,8,13*b*-octahydro-1*H*-naphtho[2,1-*b*]carbazole-4-carboxylate [(+)-**22**]:** Xiamycin A methyl ester TMS ether [(+)-**22**] was obtained as yellow foam (2.91 mmol scale, 1.29 g, 99% yield).  $R_f$  = 0.2 (10% EtOAc in *n*-hexane).

**$^1\text{H}$  NMR** (500 MHz,  $\text{CDCl}_3$ ):  $\delta$  8.03 (d,  $J$  = 7.8 Hz, 1H), 7.96 (s, 1H), 7.85 (s, 1H), 7.38 (d,  $J$  = 3.6 Hz, 2H), 7.22 (dt,  $J$  = 8.0, 3.9 Hz, 1H), 7.07 (s, 1H), 4.16 (dd,  $J$  = 11.4, 4.2 Hz, 1H), 3.72 (s, 3H), 3.13 – 3.05 (m, 2H), 2.60 – 2.53 (m, 1H), 2.24 (dd,  $J$  = 12.5, 2.5 Hz, 1H), 2.08 – 1.97 (m, 1H), 1.95 – 1.81 (m, 3H), 1.42 (ddt,  $J$  = 12.7, 7.3, 2.3 Hz, 1H), 1.32 (s, 3H), 1.30 (s, 3H), 0.09 (s, 9H).

**$^{13}\text{C}$  NMR** (125 MHz,  $\text{CDCl}_3$ ):  $\delta$  177.9, 141.4, 140.0, 138.2, 133.5, 125.4, 123.7, 121.9, 119.9, 119.1, 115.6, 110.5, 109.8, 76.0, 54.7, 51.9, 46.3, 37.5, 37.1, 30.7, 28.3, 25.7, 21.5, 10.9, 0.2.

**IR** (neat)  $\nu_{\text{max}}$  3375, 2932, 2852, 1707, 1615, 1442, 1213, 1042, 778, 534  $\text{cm}^{-1}$ .

**HRMS** (ESI)  $m/z$ :  $[\text{M} + \text{Na}]^+$  calcd. for  $[\text{C}_{27}\text{H}_{35}\text{O}_3\text{NSi} + \text{Na}]^+$  472.2278, found 472.2255.

$[\alpha]^{25}_{589} = +98.21$  ( $c$  = 0.95,  $\text{CH}_3\text{OH}$ ).

**Cu(I)-Catalyzed Aerobic Oxidative *N*–*N* bond formation of [(+)-**23**]:**

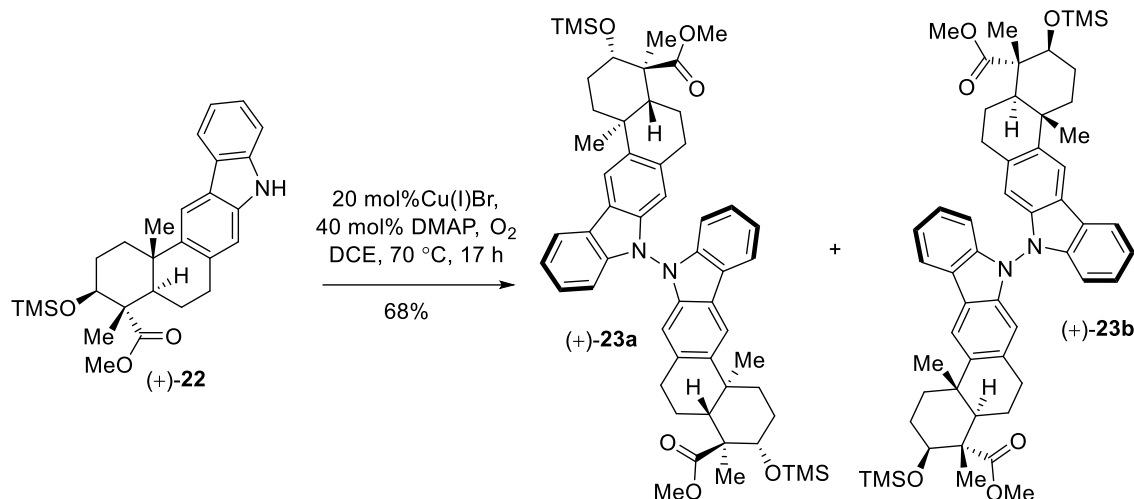

In an oven-dried sealed tube equipped with a septum and magnetic bar, (+)-**22** (300 mg, 0.67 mmol, 1.0 equiv.) was taken in 1,2-dichloroethane (8 mL) and 4-*N,N*-dimethylamino pyridine (DMAP, 32.7 mg, 0.27 mmol, 0.40 eq.) was added. This reaction mixture was purged with O<sub>2</sub> gas (using an O<sub>2</sub> balloon having 1 atm. pressure) for 10 minutes. Next, Cu(I)Br (27.5 mg, 0.134 mmol, 0.2 eq.) was added and capped the sealed tube tightly and placed on a pre-heated oil bath at 70 °C and stirring was continued. Upon completion of the reaction (monitored by TLC analysis), most of the volatiles were evaporated under reduced pressure and purified by column chromatography using 5% EtOAc in *n*-hexane to afford 126 mg (42% yield) dixiamycin A methyl ester TMS ether **23a** and 78 mg (26% yield) dixiamycin B methyl ester TMS ether **23b**.

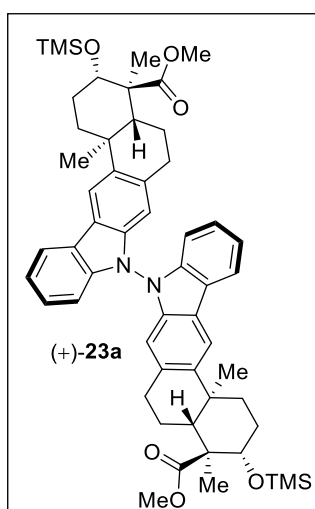

**Dimethyl** (3*S*,3'*S*,4*aR*,4'*S*,4'*aR*,8*R*,13*bS*,13'*bS*)-**4,4',13b,13'b-tetramethyl-3,3'-bis((trimethylsilyl)oxy)-1,1',2,2',3,3',4,4a,4',4'a,5,5',6,6',13b,13'b-hexadecahydro-[8,8'-binaphtho[2,1-*b*]carbazole]-4,4'-dicarboxylate** [(+)-**23a**]: Dixiamycin A methyl ester TMS

ether [(+)-**23a**] was obtained as colorless gel (0.67 mmol scale, 126 mg, 42% yield).  $R_f$  = 0.28 (5% EtOAc in *n*-hexane).

**$^1\text{H}$  NMR** (500 MHz,  $\text{CDCl}_3$ )  $\delta$  8.16 – 8.11 (m, 2H), 8.07 (s, 2H), 7.32 – 7.29 (m, 2H), 7.27 (d,  $J$  = 9.3 Hz, 2H), 6.81 – 6.76 (m, 2H), 6.63 (s, 2H), 4.15 (dt,  $J$  = 11.0, 3.4 Hz, 2H), 3.67 (s, 6H), 2.94 – 2.84 (m, 4H), 2.61 (dd,  $J$  = 9.4, 3.3 Hz, 2H), 2.20 (dt,  $J$  = 12.7, 2.7 Hz, 2H), 1.96 – 1.90 (m, 4H), 1.89 – 1.82 (m, 4H), 1.35 (s, 6H), 1.31 – 1.30 (m, 2H), 1.28 (s, 6H), 0.09 (s, 18H).

**$^{13}\text{C}$  NMR** (125 MHz,  $\text{CDCl}_3$ )  $\delta$  177.7, 143.0, 140.0, 138.4, 134.5, 126.0, 122.2, 120.8, 120.3, 120.1, 116.1, 109.0, 108.3, 76.0, 54.6, 51.9, 46.1, 37.5, 37.2, 30.5, 28.2, 25.7, 21.3, 10.9, 0.2.

**IR** (neat)  $\nu_{\text{max}}$  3313, 2891, 2812, 1692, 1591, 1586, 1442, 1248, 1197, 1074, 807  $\text{cm}^{-1}$ .

**HRMS** (ESI)  $m/z$ :  $[\text{M} + \text{Na}]^+$  calcd. for  $[\text{C}_{54}\text{H}_{68}\text{O}_6\text{N}_2\text{Si}_2 + \text{Na}]^+$  919.4508, found 919.4522.

$[\alpha]_{589}^{25} = +67.7$  ( $c$  = 0.42,  $\text{CH}_3\text{OH}$ ).

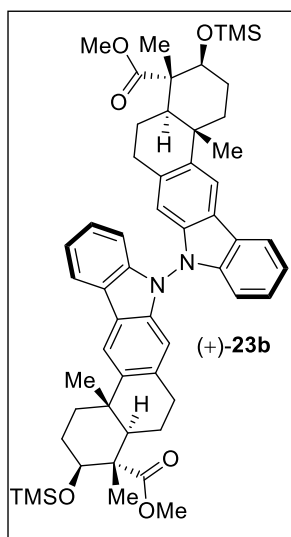

**Dimethyl** (3*S*,3'*S*,4*S*,4*aR*,4'*S*,4'*aR*,13*bS*,13'*bS*)-**4,4',13b,13'b-tetramethyl-3,3'-bis((trimethylsilyl)oxy)-1,1',2,2',3,3',4,4a,4',4'a,5,5',6,6',13b,13'b-hexadecahydro-[8,8'-binaphtho[2,1-*b*]carbazole]-4,4'-dicarboxylate** [(+)-**23b**]: Dixiamycin B methyl ester TMS ether [(+)-**23b**] was obtained as colorless gel (0.67 mmol scale, 78 mg, 26% yield).  $R_f$  = 0.3 (5% EtOAc in *n*-hexane).

**<sup>1</sup>H NMR** (500 MHz, CDCl<sub>3</sub>)  $\delta$  8.15 (dd,  $J$  = 6.4, 2.3 Hz, 2H), 8.07 (s, 2H), 7.31 (ddd,  $J$  = 6.7, 4.1, 1.7 Hz, 4H), 6.93 – 6.87 (m, 2H), 6.52 (s, 2H), 4.16 (dd,  $J$  = 11.1, 4.1 Hz, 2H), 3.68 (s, 6H), 2.92 – 2.83 (m, 4H), 2.61 (dq,  $J$  = 8.7, 5.6, 4.0 Hz, 2H), 2.20 (dd,  $J$  = 12.6, 2.5 Hz, 2H), 1.98 – 1.91 (m, 4H), 1.91 – 1.83 (m, 4H), 1.35 (s, 6H), 1.33 – 1.31 (m, 2H), 1.28 (s, 6H), 0.10 (s, 18H).

**<sup>13</sup>C NMR** (125 MHz, CDCl<sub>3</sub>)  $\delta$  177.8, 143.0, 140.2, 138.3, 134.5, 126.0, 122.2, 120.8, 120.3, 120.1, 116.1, 109.0, 108.3, 76.0, 54.6, 51.9, 46.1, 37.5, 37.2, 30.5, 28.2, 25.7, 21.3, 10.9, 0.2.

**IR** (neat)  $\nu_{\max}$  3321, 2899, 2841, 1697, 1601, 1591, 1437, 1245, 1201, 1072, 796 cm<sup>-1</sup>.

**HRMS** (ESI)  $m/z$ : [M+ Na]<sup>+</sup> calcd. for [C<sub>54</sub>H<sub>68</sub>O<sub>6</sub>N<sub>2</sub>Si<sub>2</sub> + Na]<sup>+</sup> 919.4508, found 919.4527.

$[\alpha]^{25}_{589} = +30.0$  ( $c$  = 0.32, CH<sub>3</sub>OH).

#### Total Synthesis of Dixiamycin A Methyl Ester [(+)-24a]:

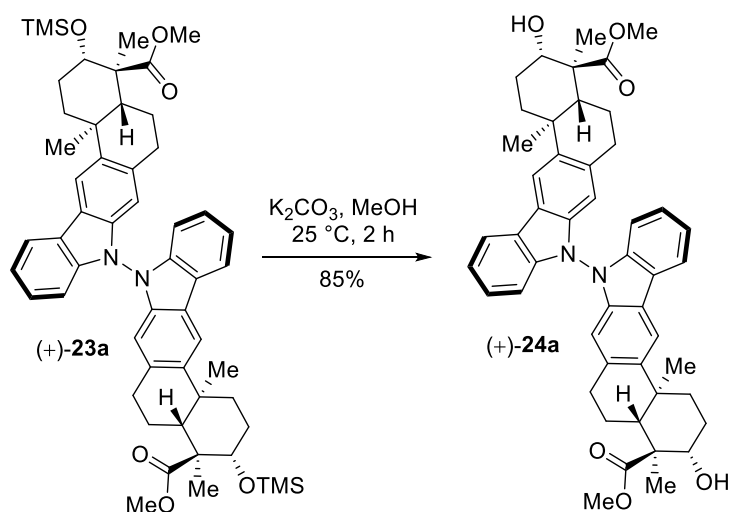

In an oven dried round-bottom flask, (+)-**23a** (36 mg, 0.04 mmol, 1.0 equiv.) was taken in MeOH (3 mL) at 25 °C. K<sub>2</sub>CO<sub>3</sub> (28 mg, 0.2 mmol, 5.0 equiv.) was added to it and stirring continued for 2 h. Upon completion of the reaction (monitored by TLC analysis), water (3 mL) was added to the reaction mixture the whole mixture was extracted with ethyl acetate (5 mL X 4). The organic layers were collected and dried over Na<sub>2</sub>SO<sub>4</sub> and concentrated on a rotary evaporator under reduced pressure. The crude product was purified by flash column

chromatography with 25% EtOAc in *n*-hexane to afford (+)-**24a** as white foam (25 mg, 85% yield).

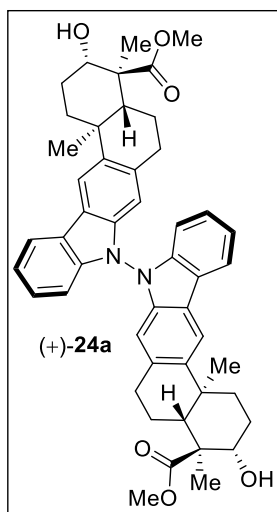

**Dimethyl (3*S*,3'*S*,4*aR*,4'*S*,4'*aR*,8*R*,13*bS*,13'*bS*)-3,3'-dihydroxy-4,4',13*b*,13'*b*-tetramethyl-1,1',2,2',3,3',4,4*a*,4',4'*a*,5,5',6,6',13*b*,13'*b*-hexadecahydro-[8,8'-binaphtho[2,1-*b*]carbazole]-4,4'-dicarboxylate [(+)-**24a**]**: Dixiamycin A methyl ester [(+)-**24a**] was obtained as white foam (0.04 mmol scale, 25 mg, 85% yield).  $R_f = 0.23$  (50% EtOAc in *n*-hexane).

**$^1\text{H}$  NMR** (500 MHz,  $\text{CD}_3\text{OD}$ ):  $\delta$  8.12 (s, 2H), 8.09 (d,  $J = 7.0$  Hz, 2H), 7.18 (td,  $J = 7.5, 1.2$  Hz, 2H), 7.13 (td,  $J = 7.6, 1.3$  Hz, 2H), 6.66 – 6.61 (m, 2H), 6.36 (s, 2H), 4.09 – 4.02 (m, 2H), 3.60 (s, 6H), 2.70 – 2.62 (m, 6H), 2.07 (dd,  $J = 12.5, 2.5$  Hz, 2H), 1.94 – 1.81 (m, 6H), 1.80 – 1.72 (m, 2H), 1.30 (s, 2H), 1.28 (s, 6H), 1.23 (s, 6H).

**$^{13}\text{C}$  NMR** (125 MHz,  $\text{CD}_3\text{OD}$ ):  $\delta$  179.4, 144.4, 141.5, 139.7, 135.6, 127.2, 123.5, 122.1, 121.8, 121.4, 117.5, 109.7, 109.1, 76.2, 55.4, 52.6, 47.7, 38.8, 38.5, 31.5, 28.4, 26.17, 22.26, 11.3.

**IR** (neat)  $\nu_{\text{max}}$  3342, 3325, 2882, 1706, 1674, 1568, 1461, 1253, 1057, 912  $\text{cm}^{-1}$ .

**HRMS** (ESI)  $m/z$ :  $[\text{M} + \text{Na}]^+$  calcd. for  $[\text{C}_{48}\text{H}_{52}\text{O}_6\text{N}_2 + \text{Na}]^+$  775.3718, found 775.3721.

$[\alpha]_D^{25} = +59.50$  ( $c = 0.36$ ,  $\text{CH}_3\text{OH}$ ).

**Total Synthesis of Dixiamycin B Methyl Ester [(+)-**24b**]:**

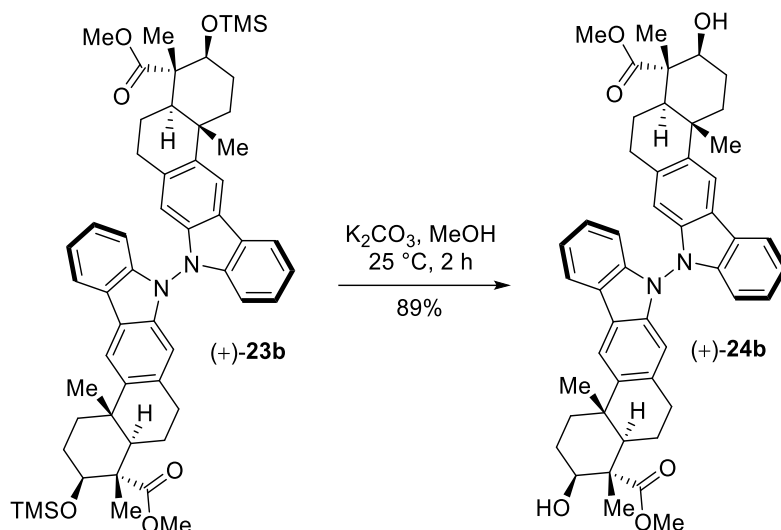

In an oven dried round-bottom flask, (+)-**23b** (60 mg, 0.066 mmol, 1.0 equiv.) was taken in MeOH (4 mL) at 25 °C. K<sub>2</sub>CO<sub>3</sub> (47 mg, 0.33 mmol, 5.0 equiv.) was added to it and stirring continued for 2 h. Upon completion of the reaction (monitored by TLC analysis), water (5 mL) was added to the reaction mixture the whole mixture was extracted with ethyl acetate (5 mL X 4). The organic layers were collected and dried over Na<sub>2</sub>SO<sub>4</sub> and concentrated on a rotary evaporator under reduced pressure. The crude product was purified by flash column chromatography with 25% EtOAc in *n*-hexane to afford (+)-**24b** as white foam (44 mg, 89% yield).

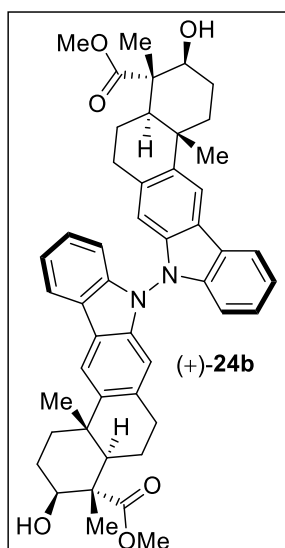

**Dimethyl (3*S*,3'*S*,4*S*,4*aR*,4'*S*,4'*aR*,13*bS*,13'*bS*)-3,3'-dihydroxy-4,4',13*b*,13'*b*-tetramethyl-1,1',2,2',3,3',4,4*a*,4',4'*a*,5,5',6,6',13*b*,13'*b*-hexadecahydro-[8,8'-binaphtho[2,1-*b*]carbazole]-4,4'-dicarboxylate [(+)-**24b**]**: Dixiamycin B methyl ester [(+)-**24b**] was

obtained as white foam (0.066 mmol scale, 44 mg, 89% yield).  $R_f = 0.2$  (50% EtOAc in *n*-hexane).

**$^1\text{H}$  NMR** (500 MHz,  $\text{CD}_3\text{OD}$ ):  $\delta$  8.15 (d,  $J = 6.9$  Hz, 2H), 7.23 (p,  $J = 7.3$  Hz, 2H), 6.71 (d,  $J = 7.7$  Hz, 2H), 6.41 (s, 2H), 4.08 (t,  $J = 8.1$  Hz, 2H), 3.65 (s, 6H), 2.81 – 2.74 (m, 4H), 2.69 (d,  $J = 13.2$  Hz, 2H), 2.10 (d,  $J = 12.4$  Hz, 2H), 1.92 (d,  $J = 9.8$  Hz, 6H), 1.83 – 1.74 (m, 2H), 1.39 (s, 2H), 1.32 (s, 6H), 1.25 (s, 6H).

**$^{13}\text{C}$  NMR** (125 MHz,  $\text{CD}_3\text{OD}$ ):  $\delta$  179.4, 144.4, 141.6, 139.7, 135.7, 127.2, 123.5, 122.1, 121.9, 121.4, 117.5, 109.7, 109.1, 76.2, 55.4, 52.5, 47.8, 38.9, 38.5, 31.6, 28.4, 26.14, 22.3, 11.3.

**IR** (neat)  $\nu_{\text{max}}$  3101, 2932, 2861, 1709, 1667, 1641, 1417, 1401, 1373, 1227, 973, 761  $\text{cm}^{-1}$ .

**HRMS** (ESI)  $m/z$ :  $[\text{M} + \text{K}]^+$  calcd. for  $[\text{C}_{48}\text{H}_{52}\text{O}_6\text{N}_2 + \text{K}]^+$  791.3457, found 791.3474.

$[\alpha]_{589}^{25} = +80.5$  ( $c = 0.41$ ,  $\text{CH}_3\text{OH}$ ).

#### Total Synthesis of Dixiamycin A [(+)-1a]:

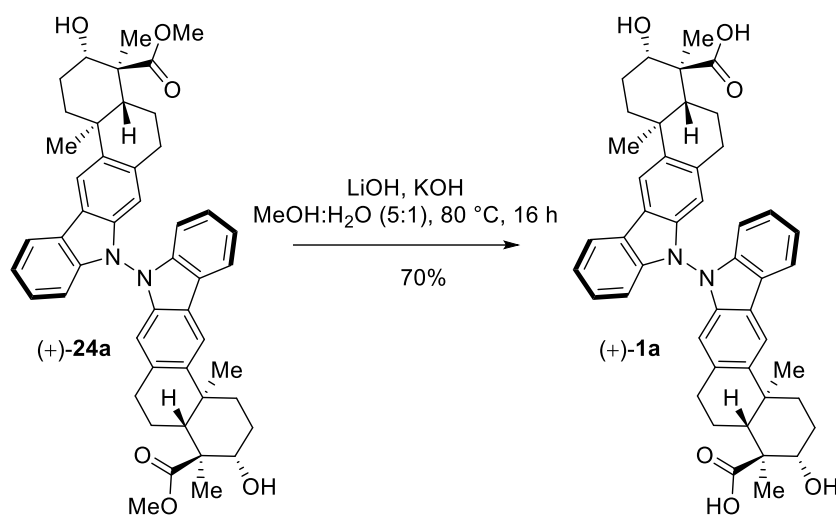

In a round-bottom flask dixiamycin A methyl ester [(+)-**24a**] (9 mg, 0.012 mmol, 1.0 equiv.) was taken in a 5 mL mixture of methanol and water [ $\text{MeOH}:\text{H}_2\text{O}$  (5:1)] at 25  $^\circ\text{C}$ . KOH (34 mg, 0.6 mmol, 50 equiv.) and LiOH (15 mg, 0.36 mmol, 30 equiv.) were added successively to the reaction mixture at the same temperature. Next, this was placed on a pre-heated oil bath maintaining temperature at 80  $^\circ\text{C}$ . After completion of the reaction (16 h), as confirmed by



TLC analysis, it was quenched with 6(*N*) HCl at 0 °C and the pH of the reaction mixture was adjusted to ~1-2 and extracted with ethyl acetate (6 mL X 4). The organic layers were collected, dried over Na<sub>2</sub>SO<sub>4</sub> and concentrated under reduced pressure. The crude product was purified by flash column chromatography with 10% MeOH in CH<sub>2</sub>Cl<sub>2</sub> to afford dixiamycin A [(+)-**1a**] as white solid (6 mg, 70% yield).

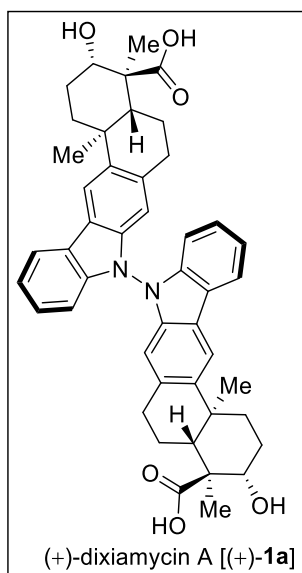

(3*S*,3'*S*,4*aR*,4'*S*,4'*aR*,8*R*,13*bS*,13'*bS*)-**3,3'**-Dihydroxy-4,4',13*b*,13'*b*-tetramethyl-1,1',2,2',3,3',4,4*a*,4',4'*a*,5,5',6,6',13*b*,13'*b*-hexadecahydro-[8,8'-binaphtho[2,1-*b*]carbazole]-4,4'-dicarboxylic acid [(+)-**1a**]: Dixiamycin A [(+)-**1a**] was obtained as white solid (0.012 mmol scale, 6 mg, 70% yield). *R<sub>f</sub>* = 0.27 (10% MeOH in CH<sub>2</sub>Cl<sub>2</sub>).

**<sup>1</sup>H NMR** (500 MHz, CD<sub>3</sub>OD) δ 8.16 (d, *J* = 6.6 Hz, 4H), 7.28 – 7.23 (m, 4H), 6.73 – 6.68 (m, 2H), 6.45 (s, 2H), 4.10 (q, *J* = 7.4, 5.6 Hz, 2H), 2.84 – 2.73 (m, 4H), 2.74 – 2.65 (m, 2H), 2.12 (d, *J* = 12.1 Hz, 2H), 1.96 – 1.87 (m, 6H), 1.78 (dt, *J* = 18.0, 8.9 Hz, 2H), 1.46 – 1.42 (m, 2H), 1.31 (s, 6H), 1.22 (s, 6H).

**<sup>13</sup>C NMR** (125 MHz, CD<sub>3</sub>OD) δ 180.1, 144.4, 141.4, 139.6, 135.7, 127.1, 123.4, 122.0, 121.7, 121.3, 117.4, 109.6, 108.9, 76.1, 54.7, 47.5, 38.8, 38.4, 31.7, 28.4, 26.1, 22.1, 11.3.

**IR** (neat) *ν*<sub>max</sub> 3365, 2917, 2845, 1693, 1480, 1204, 1099, 851 cm<sup>-1</sup>.

**HRMS** (ESI) *m/z*: [M+ Na]<sup>+</sup> calcd. for [C<sub>46</sub>H<sub>47</sub>O<sub>6</sub>N<sub>2</sub> + Na]<sup>+</sup> 747.3405, found 747.3431.

[α]<sub>D</sub><sup>25</sup> = +77.5 (*c* = 0.34, CH<sub>3</sub>OH); lit.<sup>[6]</sup> [α]<sub>D</sub><sup>21</sup> = +90 (*c* = 0.4, CH<sub>3</sub>OH).

**Comparison of  $^1\text{H}$ -NMR Data of Dixiamycin A [(+)-**1a**] of this report with natural Dixiamycin A [(+)-**1a**] by Zhang<sup>[6]</sup>:**

| Zhang's report Dixiamycin A [(+)- <b>1a</b> ]<br>( $^1\text{H}$ -NMR, 500 MHz, $\text{CD}_3\text{OD}$ ) <sup>[6]</sup> |      |       |                         |
|------------------------------------------------------------------------------------------------------------------------|------|-------|-------------------------|
| $\delta$ (ppm)                                                                                                         | Int. | mult. | $J$ (Hz)                |
| 8.13                                                                                                                   | 1H   | d     | $J = 7.0$ Hz            |
| 8.10                                                                                                                   | 1H   | s     | -                       |
| 7.26                                                                                                                   | 1H   | t     | $J = 7.0$ Hz            |
| 7.24                                                                                                                   | 1H   | t     | $J = 7.0$ Hz            |
| 6.73                                                                                                                   | 1H   | d     | $J = 7.0$ Hz            |
| 6.53                                                                                                                   | 1H   | s     | -                       |
| 4.10                                                                                                                   | 1H   | dd    | $J = 9.0, 6.5$ Hz       |
| 2.87                                                                                                                   | 2H   | -     | -                       |
| 2.66                                                                                                                   | 1H   | dt    | $J = 12.3, 2.0$ Hz      |
| 2.17                                                                                                                   | 1H   | dd    | $J = 12.5, 1.6$ Hz      |
| 1.95                                                                                                                   | 2H   | -     | -                       |
| 1.91                                                                                                                   | 1H   | -     | -                       |
| 1.84                                                                                                                   | 1H   | ddd   | $J = 12.3, 9.0, 1.0$ Hz |
| 1.47                                                                                                                   | 1H   | m     | -                       |
| 1.35                                                                                                                   | 3H   | s     | -                       |
| 1.25                                                                                                                   | 3H   | s     | -                       |

| Li's isolation of Dixiamycin A [(+)- <b>1a</b> ]<br>( $^1\text{H}$ -NMR, 600 MHz, $\text{CD}_3\text{OD}$ ) <sup>[7]</sup> |      |       |
|---------------------------------------------------------------------------------------------------------------------------|------|-------|
| $\delta$ (ppm)                                                                                                            | Int. | mult. |
| 8.16 – 8.14                                                                                                               | 2H   | m     |
| 7.27 – 7.22                                                                                                               | 2H   | m     |
| 6.72 - 6.71                                                                                                               | 1H   | q     |
| 6.44                                                                                                                      | 1H   | s     |

|             |    |   |
|-------------|----|---|
| 4.10 – 4.07 | 1H | t |
| 2.86 – 2.80 | 2H | m |
| 2.69 – 2.66 | 1H | m |
| 2.13 – 2.11 | 1H | d |
| 1.95 – 1.89 | 3H | m |
| 1.80 – 1.75 | 1H | m |
| 1.47 – 1.44 | 1H | m |
| 1.32        | 3H | s |
| 1.21        | 3H | s |

| This synthesis: Dixiamycin A [(+)- <b>1a</b> ]<br>( <sup>1</sup> H-NMR, 500 MHz, CD <sub>3</sub> OD) |      |       |                         |
|------------------------------------------------------------------------------------------------------|------|-------|-------------------------|
| δ (ppm)                                                                                              | Int. | mult. | <i>J</i> (Hz)           |
| 8.16                                                                                                 | 4H   | d     | <i>J</i> = 6.6 Hz       |
| 7.28 – 7.23                                                                                          | 4H   | m     | -                       |
| 6.73 – 6.68                                                                                          | 2H   | m     | -                       |
| 6.45                                                                                                 | 2H   | s     | -                       |
| 4.10                                                                                                 | 2H   | q     | <i>J</i> = 7.4, 5.6 Hz  |
| 2.84 – 2.73                                                                                          | 4H   | m     | -                       |
| 2.74 – 2.65                                                                                          | 2H   | m     | -                       |
| 2.12                                                                                                 | 2H   | d     | <i>J</i> = 12.1 Hz      |
| 1.96 – 1.87                                                                                          | 6H   | m     | -                       |
| 1.78                                                                                                 | 2H   | dt    | <i>J</i> = 18.0, 8.9 Hz |
| 1.46 – 1.42                                                                                          | 2H   | m     | -                       |
| 1.31                                                                                                 | 6H   | s     | -                       |
| 1.22                                                                                                 | 6H   | s     | -                       |

**Comparison of  $^{13}\text{C}$ -NMR Data:**

| Zhang's isolation of<br>Dixiamycin A [(+)- <b>1a</b> ] ( $^{13}\text{C}$ -<br>NMR, 125.77 MHz,<br>$\text{CD}_3\text{OD}$ ) <sup>[6]</sup> | This synthesis: Dixiamycin A<br>[(+)- <b>1a</b> ] ( $^{13}\text{C}$ -NMR, 125 MHz,<br>$\text{CD}_3\text{OD}$ ) |
|-------------------------------------------------------------------------------------------------------------------------------------------|----------------------------------------------------------------------------------------------------------------|
| 180.0                                                                                                                                     | 180.1                                                                                                          |
| 144.2                                                                                                                                     | 144.4                                                                                                          |
| 141.2                                                                                                                                     | 141.4                                                                                                          |
| 139.5                                                                                                                                     | 139.6                                                                                                          |
| 135.6                                                                                                                                     | 135.7                                                                                                          |
| 126.9                                                                                                                                     | 127.1                                                                                                          |
| 123.3                                                                                                                                     | 123.4                                                                                                          |
| 121.9                                                                                                                                     | 122.0                                                                                                          |
| 121.5                                                                                                                                     | 121.7                                                                                                          |
| 121.1                                                                                                                                     | 121.3                                                                                                          |
| 117.2                                                                                                                                     | 117.4                                                                                                          |
| 109.7                                                                                                                                     | 109.6                                                                                                          |
| 109.1                                                                                                                                     | 108.9                                                                                                          |
| 76.0                                                                                                                                      | 76.1                                                                                                           |
| 54.6                                                                                                                                      | 54.7                                                                                                           |
| 47.2                                                                                                                                      | 47.5                                                                                                           |
| 38.8                                                                                                                                      | 38.8                                                                                                           |
| 38.3                                                                                                                                      | 38.4                                                                                                           |
| 31.7                                                                                                                                      | 31.7                                                                                                           |
| 28.3                                                                                                                                      | 28.4                                                                                                           |
| 26.4                                                                                                                                      | 26.1                                                                                                           |
| 22.1                                                                                                                                      | 22.1                                                                                                           |
| 11.4                                                                                                                                      | 11.3                                                                                                           |

**Total Synthesis of (+)-Dixiamycin B [(+)-1b]:**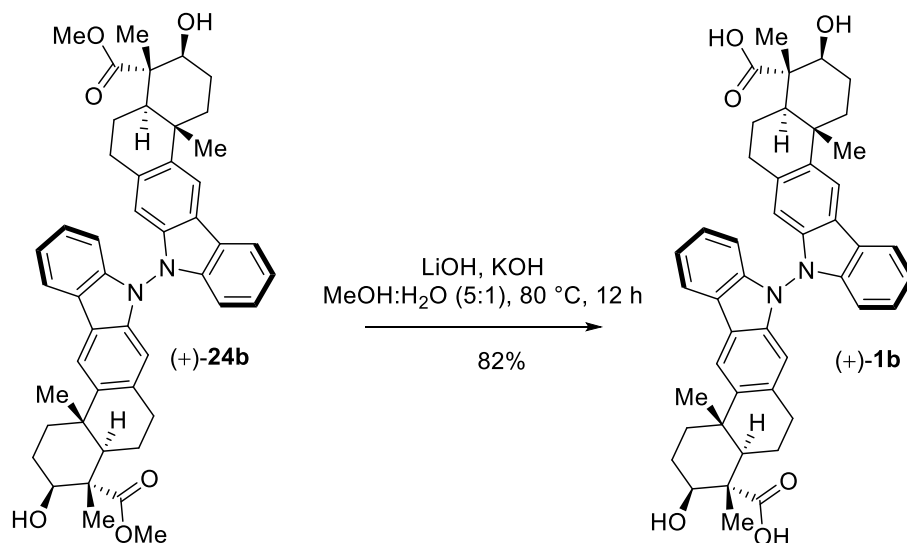

In a round-bottom flask dixiamycin B methylester [(+)-**24b**] (20 mg, 0.027 mmol, 1.0 equiv.) was taken in a 5 mL mixture of methanol and water [MeOH: H<sub>2</sub>O (5:1)] at 25 °C. KOH (75 mg, 1.33 mmol, 50 equiv.) and LiOH (34 mg, 0.81 mmol, 30 equiv.) were added successively to the reaction mixture at the same temperature. Next, this was placed on a pre-heated oil bath maintaining temperature at 80 °C. After completion of the reaction (16 h), as confirmed by TLC analysis, it was quenched with 6(*N*) HCl at 0 °C and the pH of the reaction mixture was adjusted to ~1-2 and extracted with ethyl acetate (6 mL X 4). The organic layers were collected, dried over Na<sub>2</sub>SO<sub>4</sub> and concentrated under reduced pressure. The crude product was purified by flash column chromatography with 10% MeOH in CH<sub>2</sub>Cl<sub>2</sub> to afford dixiamycin B [(+)-**1b**] as white solid (15 mg, 82% yield).

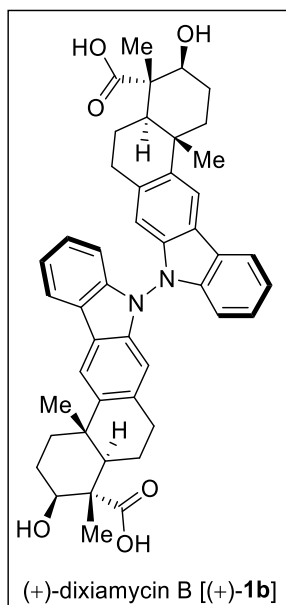

(3*S*,3'*S*,4*S*,4*aR*,4'*S*,4'*aR*,13*bS*,13'*bS*)-**3,3'**-Dihydroxy-4,4',13*b*,13'*b*-tetramethyl-1,1',2,2',3,3',4,4*a*,4',4'*a*,5,5',6,6',13*b*,13'*b*-hexadecahydro-[8,8'-binaphtho[2,1-*b*]carbazole]-4,4'-dicarboxylic acid [(+)-**1b**]: Dixiamycin B [(+)-**1b**] was obtained as white solid (0.027 mmol scale, 15 mg, 82% yield).  $R_f = 0.2$  (10% MeOH in CH<sub>2</sub>Cl<sub>2</sub>).

**<sup>1</sup>H NMR** (500 MHz, CD<sub>3</sub>OD)  $\delta$  8.17 (d,  $J = 8.8$  Hz, 4H), 7.26 (p,  $J = 7.3$  Hz, 4H), 6.73 (d,  $J = 7.5$  Hz, 2H), 6.46 (s, 2H), 4.14 – 4.08 (m, 2H), 2.83 (t,  $J = 8.5$  Hz, 4H), 2.75 – 2.67 (m, 2H), 2.14 (d,  $J = 12.2$  Hz, 2H), 1.95 (m, 6H), 1.82 (d,  $J = 13.7$  Hz, 2H), 1.49 – 1.44 (m, 2H), 1.34 (s, 6H), 1.24 (s, 6H).

**<sup>13</sup>C NMR** (125 MHz, CD<sub>3</sub>OD)  $\delta$  181.4, 144.5, 141.5, 139.7, 135.8, 127.2, 123.5, 122.1, 121.8, 121.4, 117.5, 109.7, 109.1, 76.2, 54.8, 47.6, 38.9, 38.5, 31.8, 28.6, 26.2, 22.3, 11.4.

**IR** (neat)  $\nu_{\max}$  3283, 2916, 2843, 1701, 1654, 1417, 1171, 905, 763 cm<sup>-1</sup>

**HRMS** (ESI)  $m/z$ : [M+ Na]<sup>+</sup> calcd for [C<sub>46</sub>H<sub>47</sub>O<sub>6</sub>N<sub>2</sub> + Na]<sup>+</sup>: 747.3405, found: 747.3399.

$[\alpha]^{25}_{589} = +55.12$  ( $c = 0.29$ , CH<sub>3</sub>OH); lit.<sup>[6]</sup>  $[\alpha]_D^{21} = +20$  ( $c = 0.32$ , CH<sub>3</sub>OH), lit.<sup>[4]</sup>  $[\alpha]_D = +66$  ( $c = 0.085$ , CH<sub>3</sub>OH).

**Comparison of <sup>1</sup>H-NMR Data of Dixiamycin B [(+)-**1b**]** of this report with natural Dixiamycin B [(+)-**1b**] by Hertweck<sup>[8]</sup> and with literature by Baran<sup>[4]</sup>:

| Hertweck's isolation of Dixiamycin B [(+)- <b>1b</b> ]<br>( <sup>1</sup> H-NMR, 600 MHz, CD <sub>3</sub> OD) <sup>[8]</sup> |      |       |                         |
|-----------------------------------------------------------------------------------------------------------------------------|------|-------|-------------------------|
| δ (ppm)                                                                                                                     | Int. | mult. | <i>J</i> (Hz)           |
| 8.17                                                                                                                        | 2H   | d     | <i>J</i> = 7.7 Hz       |
| 8.16                                                                                                                        | 2H   | s     | -                       |
| 7.27                                                                                                                        | 2H   | t     | <i>J</i> = 6.8 Hz       |
| 7.25                                                                                                                        | 2H   | t     | <i>J</i> = 6.8 Hz       |
| 6.73                                                                                                                        | 2H   | d     | <i>J</i> = 6.8 Hz       |
| 6.45                                                                                                                        | 2H   | s     | -                       |
| 4.09                                                                                                                        | 2H   | dd    | <i>J</i> = 8.6, 7.1 Hz  |
| 2.86                                                                                                                        | 2H   | m     | -                       |
| 2.83                                                                                                                        | 2H   | m     | -                       |
| 2.69                                                                                                                        | 2H   | td    | <i>J</i> = 13.1, 3.0 Hz |
| 2.13                                                                                                                        | 2H   | dd    | <i>J</i> = 12.5, 2.0 Hz |
| 1.93                                                                                                                        | 4H   | m     | -                       |
| 1.92                                                                                                                        | 2H   | m     | -                       |
| 1.80                                                                                                                        | 2H   | m     | -                       |
| 1.45                                                                                                                        | 2H   | m     | -                       |
| 1.33                                                                                                                        | 6H   | s     | -                       |
| 1.22                                                                                                                        | 6H   | s     | -                       |

| Baran's synthesis of Dixiamycin B [(+)- <b>1b</b> ]<br>( <sup>1</sup> H-NMR, 600 MHz, CD <sub>3</sub> OD) <sup>[4]</sup> |      |       |                        |
|--------------------------------------------------------------------------------------------------------------------------|------|-------|------------------------|
| δ (ppm)                                                                                                                  | Int. | mult. | <i>J</i> (Hz)          |
| 8.18 – 8.15                                                                                                              | 2H   | m     | -                      |
| 8.14                                                                                                                     | 2H   | s     | -                      |
| 7.28 – 7.24                                                                                                              | 4H   | m     | -                      |
| 6.72 – 6.70                                                                                                              | 2H   | m     | -                      |
| 6.47                                                                                                                     | 2H   | s     | -                      |
| 4.10                                                                                                                     | 2H   | dd    | <i>J</i> = 9.3, 7.0 Hz |
| 2.89 – 2.80                                                                                                              | 4H   | m     | -                      |

|             |    |    |                    |
|-------------|----|----|--------------------|
| 2.70        | 2H | td | $J = 13.0, 3.5$ Hz |
| 2.12        | 2H | dd | $J = 12.6, 2.3$ Hz |
| 1.94 – 1.88 | 6H | m  | -                  |
| 1.82 – 1.75 | 2H | m  | -                  |
| 1.54 – 1.48 | 2H | m  | -                  |
| 1.32        | 6H | s  | -                  |
| 1.22        | 6H | s  | -                  |

| This synthesis: Dixiamycin B [(+)- <b>1b</b> ]<br>( <sup>1</sup> H-NMR, 500 MHz, CD <sub>3</sub> OD) |      |       |               |
|------------------------------------------------------------------------------------------------------|------|-------|---------------|
| $\delta$ (ppm)                                                                                       | Int. | mult. | $J$ (Hz)      |
| 8.17                                                                                                 | 4H   | d     | $J = 8.8$ Hz  |
| 7.26                                                                                                 | 4H   | p     | $J = 7.3$ Hz  |
| 6.73                                                                                                 | 2H   | d     | $J = 7.5$ Hz  |
| 6.46                                                                                                 | 2H   | s     | -             |
| 4.14 – 4.08                                                                                          | 2H   | m     | -             |
| 2.83                                                                                                 | 4H   | t     | $J = 8.5$ Hz  |
| 2.75 – 2.67                                                                                          | 2H   | m     | -             |
| 2.14                                                                                                 | 2H   | d     | $J = 12.2$ Hz |
| 1.95                                                                                                 | 6H   | m     | -             |
| 1.82                                                                                                 | 2H   | d     | $J = 13.7$ Hz |
| 1.49 – 1.44                                                                                          | 2H   | m     | -             |
| 1.34                                                                                                 | 6H   | s     | -             |
| 1.24                                                                                                 | 6H   | s     | -             |

### Comparison of <sup>13</sup>C-NMR Data:

|                                                                                                                                    |                                                                                                                                 |                                                                                                          |
|------------------------------------------------------------------------------------------------------------------------------------|---------------------------------------------------------------------------------------------------------------------------------|----------------------------------------------------------------------------------------------------------|
| Hertweck's isolation<br>of Dixiamycin B [(+)- <b>1b</b> ] ( <sup>13</sup> C-NMR, 125.77<br>MHz, CD <sub>3</sub> OD) <sup>[8]</sup> | Baran's synthesis of<br>Dixiamycin B [(+)- <b>1b</b> ]<br>( <sup>13</sup> C-NMR, 151 MHz,<br>CD <sub>3</sub> OD) <sup>[4]</sup> | This synthesis:<br>Dixiamycin B [(+)- <b>1b</b> ] ( <sup>13</sup> C-NMR, 125<br>MHz, CD <sub>3</sub> OD) |
|------------------------------------------------------------------------------------------------------------------------------------|---------------------------------------------------------------------------------------------------------------------------------|----------------------------------------------------------------------------------------------------------|



|       |       |       |
|-------|-------|-------|
| 181.2 | 181.1 | 181.4 |
| 144.5 | 144.5 | 144.5 |
| 141.6 | 141.5 | 141.5 |
| 139.7 | 139.7 | 139.7 |
| 135.8 | 135.8 | 135.8 |
| 127.2 | 127.2 | 127.2 |
| 123.6 | 123.6 | 123.5 |
| 122.1 | 122.1 | 122.1 |
| 121.8 | 121.8 | 121.8 |
| 121.4 | 121.4 | 121.4 |
| 117.6 | 117.6 | 117.5 |
| 109.7 | 109.7 | 109.7 |
| 109.1 | 109.0 | 109.1 |
| 76.2  | 76.2  | 76.2  |
| 54.8  | 54.8  | 54.8  |
| 47.7  | 47.7  | 47.6  |
| 38.9  | 38.9  | 38.9  |
| 38.5  | 38.5  | 38.5  |
| 31.8  | 31.8  | 31.8  |
| 28.6  | 28.6  | 28.6  |
| 26.2  | 26.2  | 26.2  |
| 22.3  | 22.3  | 22.3  |
| 11.4  | 11.4  | 11.4  |

**Spectral Traces**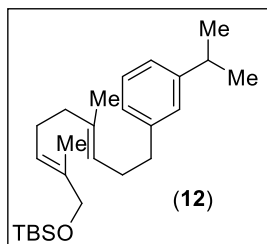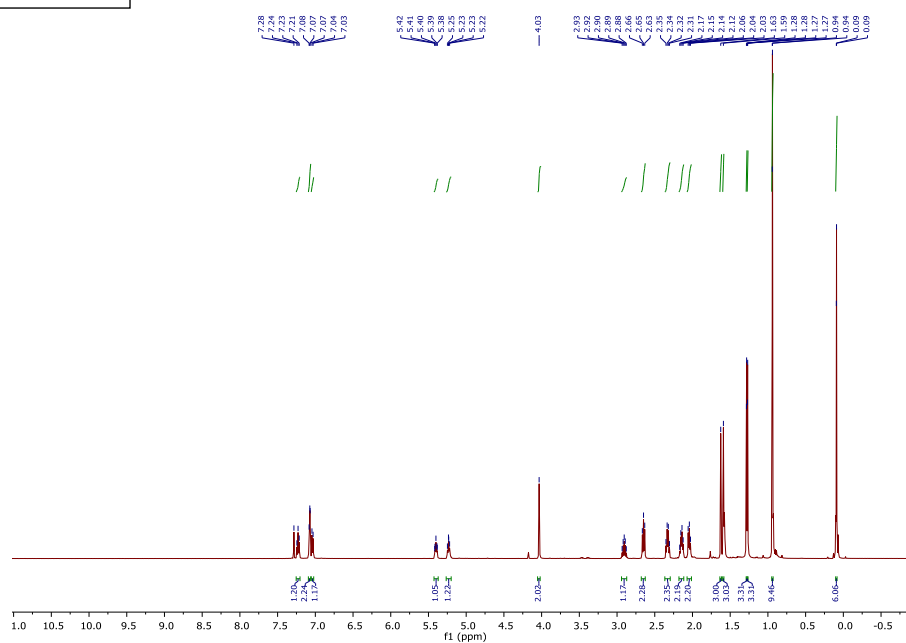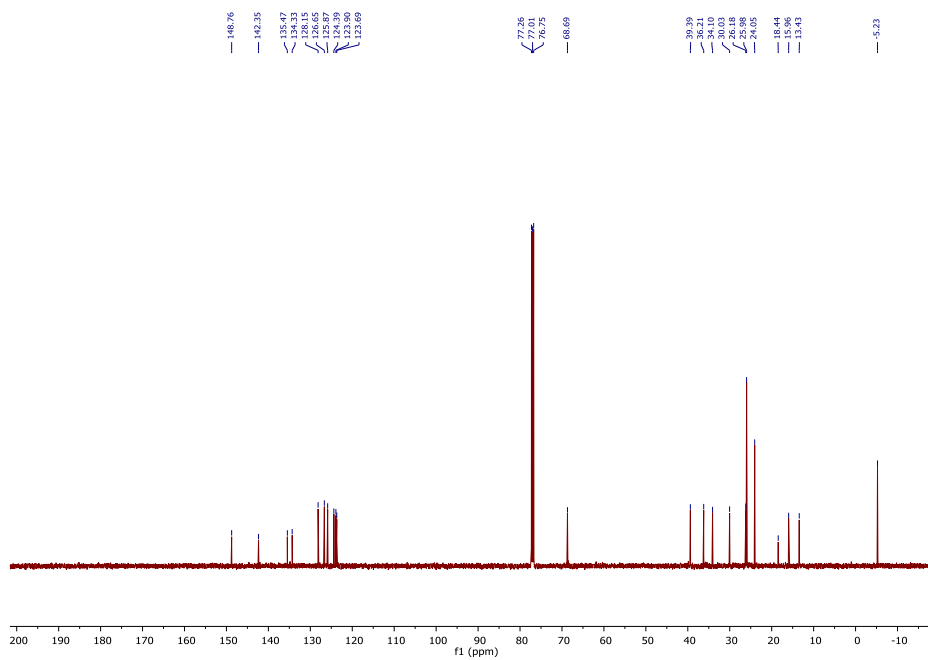

## Display Report

## Analysis Info

Analysis Name D:\Data\User data\2022\MAY\ab\_m\_0105.d

Method Tune\_pos\_Standard.m

Sample Name ab\_m\_0105

Comment

Acquisition Date 5/9/2022 2:22:30 PM

Operator IISER Kolkata

Instrument maXis impact 8282001.00127

## Acquisition Parameter

|             |          |                      |          |                  |           |
|-------------|----------|----------------------|----------|------------------|-----------|
| Source Type | ESI      | Ion Polarity         | Positive | Set Nebulizer    | 0.5 Bar   |
| Focus       | Active   | Set Capillary        | 3400 V   | Set Dry Heater   | 200 °C    |
| Scan Begin  | 50 m/z   | Set End Plate Offset | -500 V   | Set Dry Gas      | 4.0 l/min |
| Scan End    | 1000 m/z | Set Charging Voltage | 2000 V   | Set Divert Valve | Source    |
|             |          | Set Corona           | 0 nA     | Set APCI Heater  | 0 °C      |

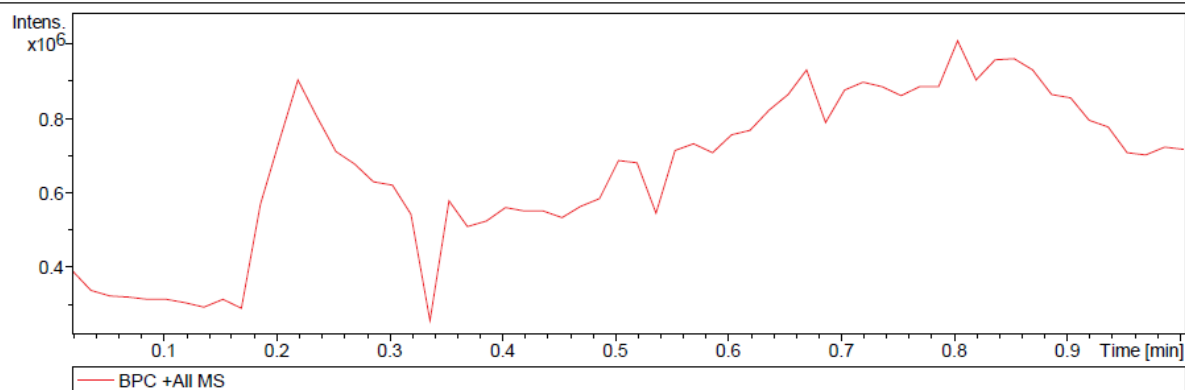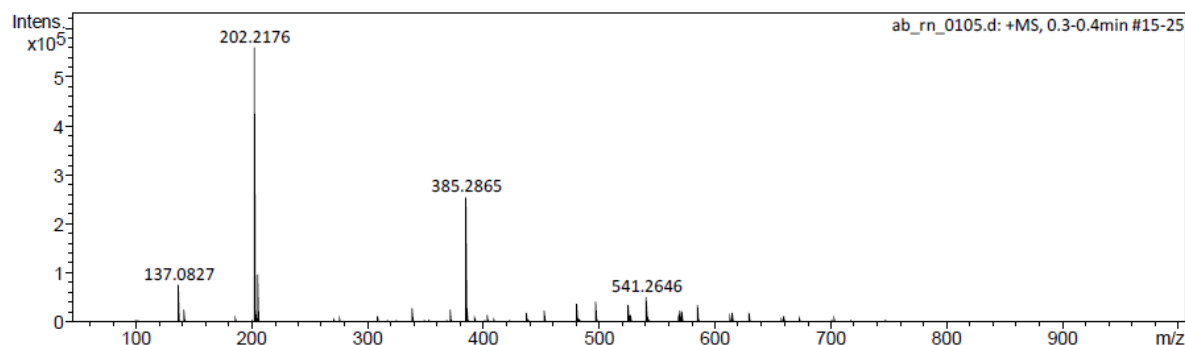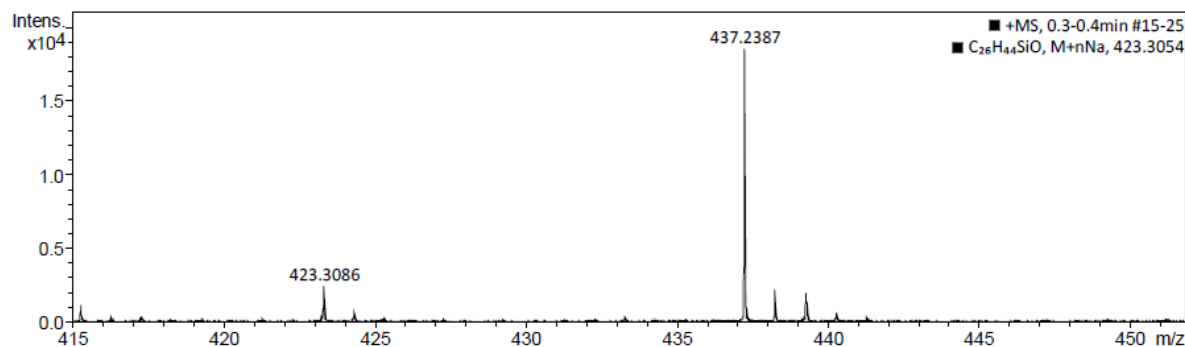

ab\_m\_0105.d

Bruker Compass DataAnalysis 4.1

printed: 5/9/2022 2:26:23 PM

by: IISER Kolkata

Page 1 of 1

HRMS data of 12

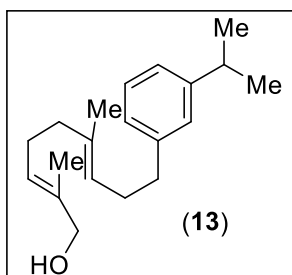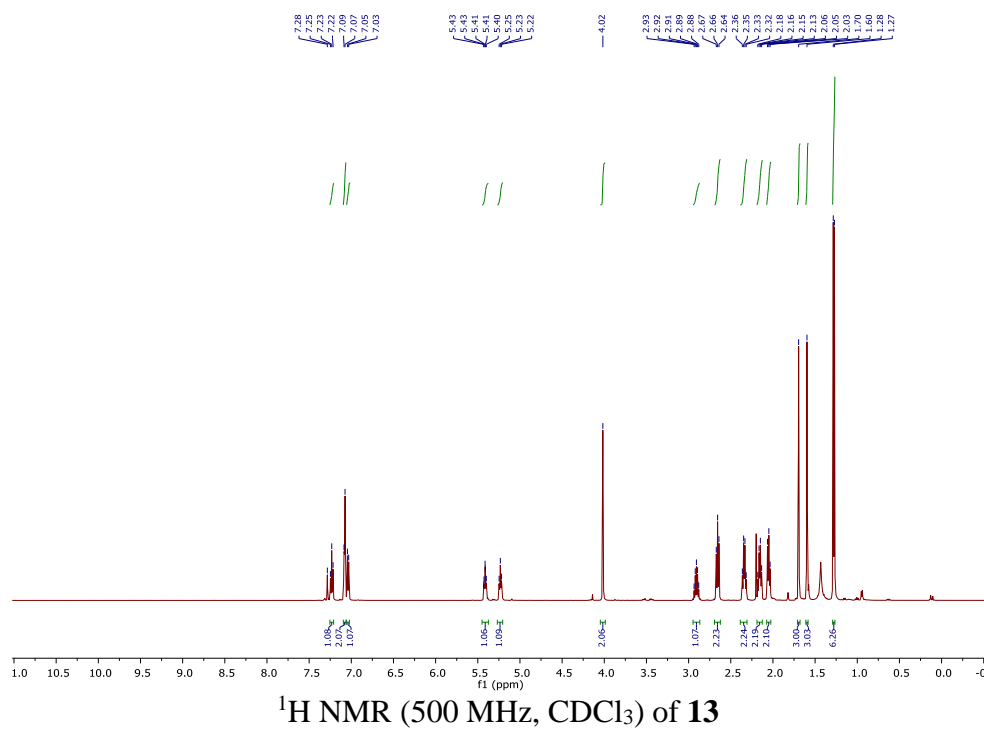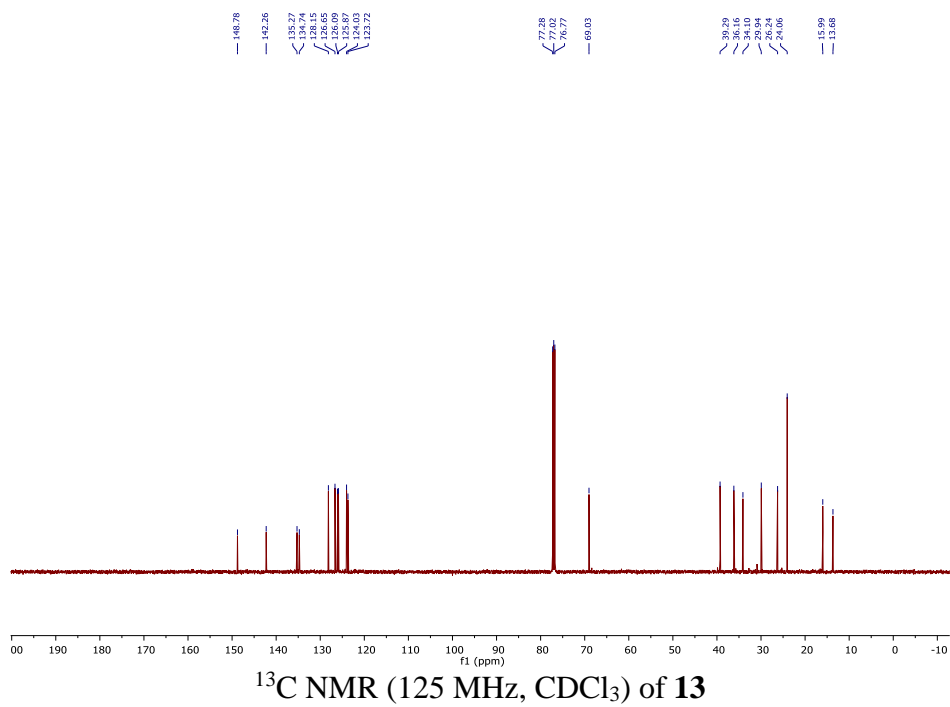

## Display Report

## Analysis Info

Analysis Name D:\Data\User\_data\2020\DEC\AB-MM-01-068REP1.d  
Method Tune\_pos\_Standard.m  
Sample Name AB-MM-01-068  
Comment

Acquisition Date 12/21/2020 11:43:30 AM

Operator IISER Kolkata  
Instrument maXis impact 8282001.00127

## Acquisition Parameter

|             |          |                      |          |                  |           |
|-------------|----------|----------------------|----------|------------------|-----------|
| Source Type | ESI      | Ion Polarity         | Positive | Set Nebulizer    | 0.5 Bar   |
| Focus       | Active   | Set Capillary        | 3400 V   | Set Dry Heater   | 200 °C    |
| Scan Begin  | 50 m/z   | Set End Plate Offset | -500 V   | Set Dry Gas      | 4.0 l/min |
| Scan End    | 1000 m/z | Set Charging Voltage | 2000 V   | Set Divert Valve | Source    |
|             |          | Set Corona           | 0 nA     | Set APCI Heater  | 0 °C      |

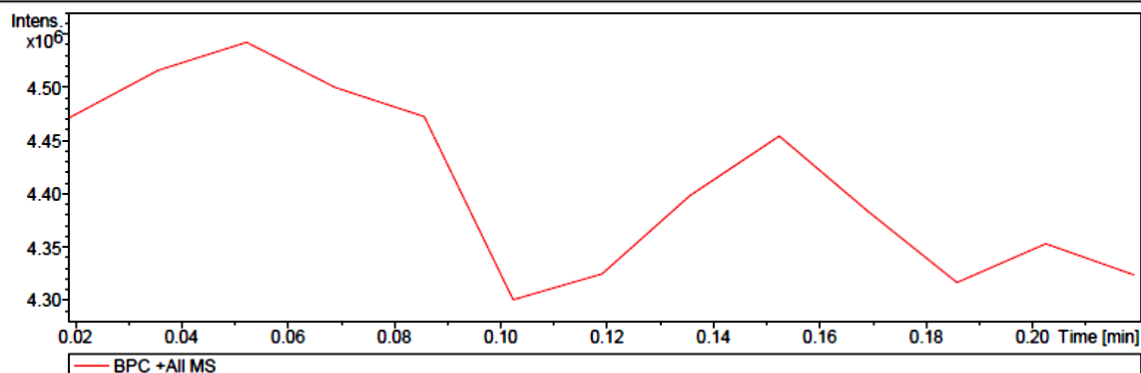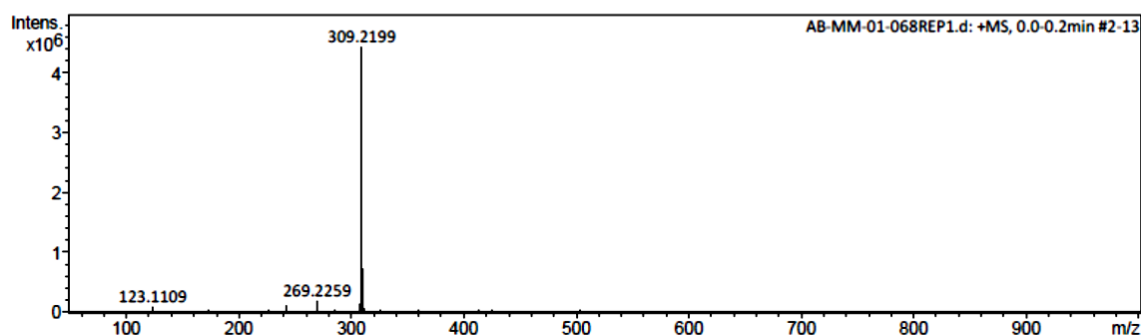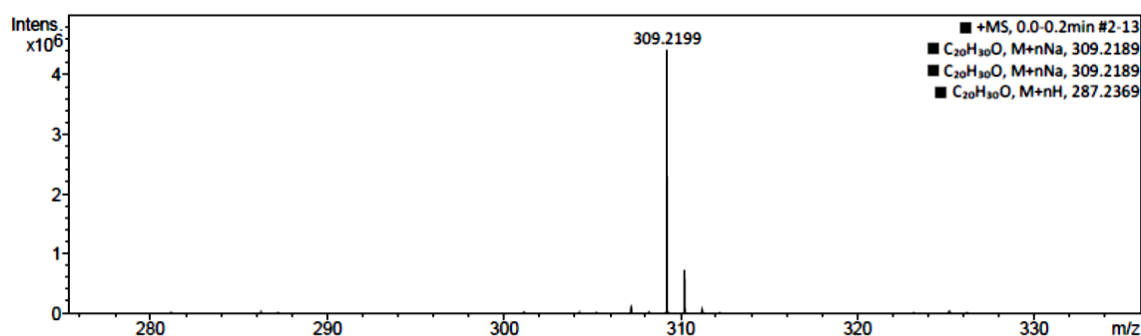

AB-MM-01-068REP1.d

Bruker Compass DataAnalysis 4.1

printed: 12/21/2020 11:45:24 AM

by: IISER Kolkata

Page 1 of 1

HRMS data of 13

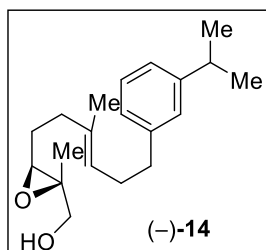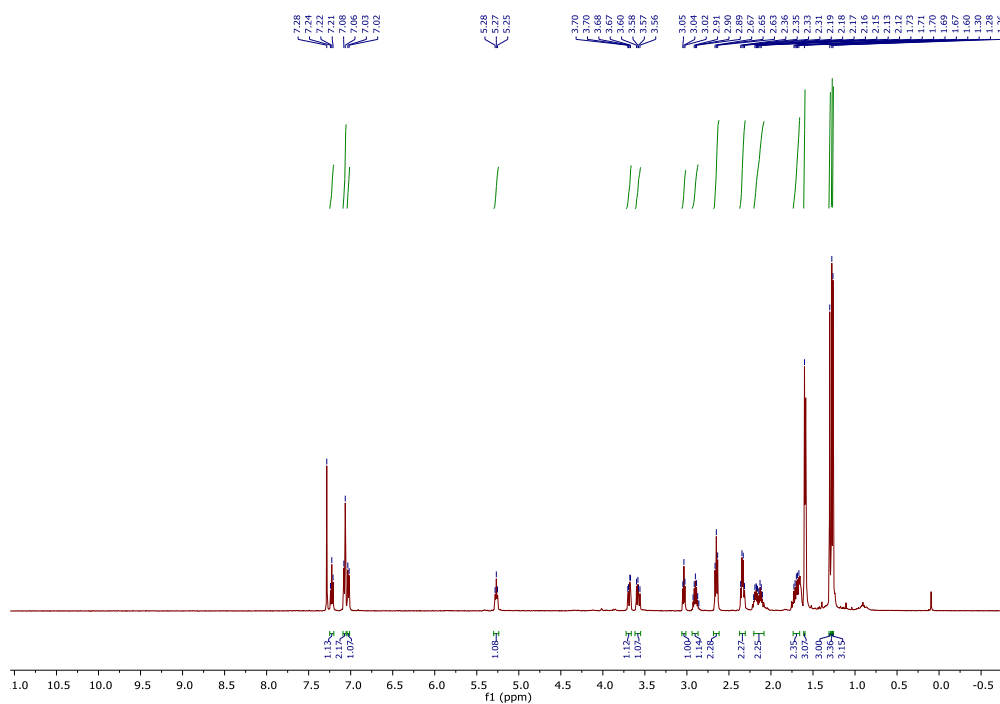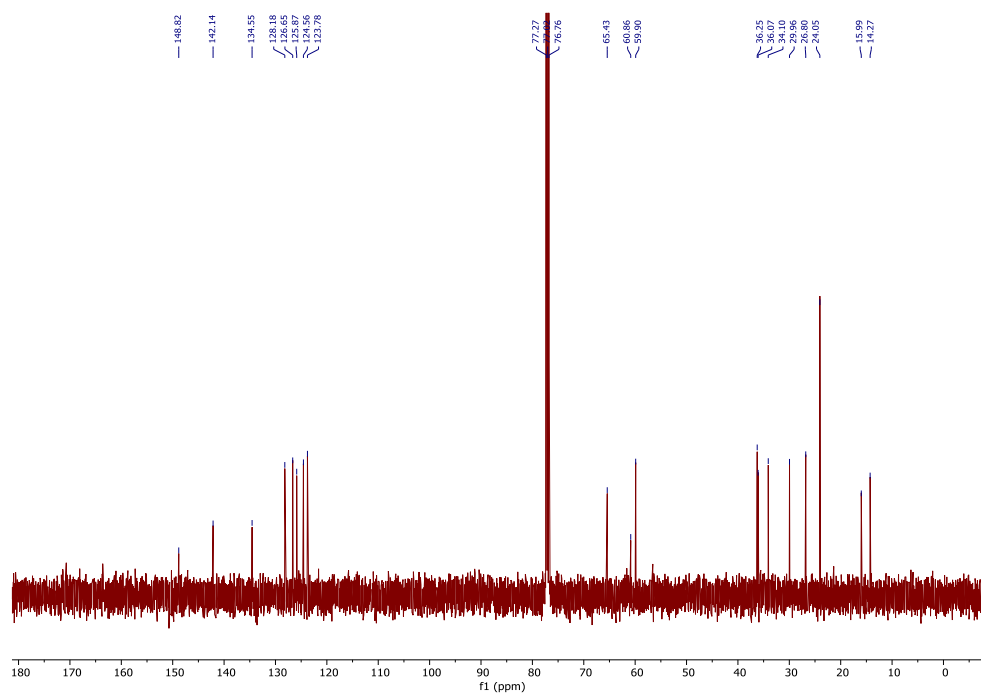

## Peak Summary Report

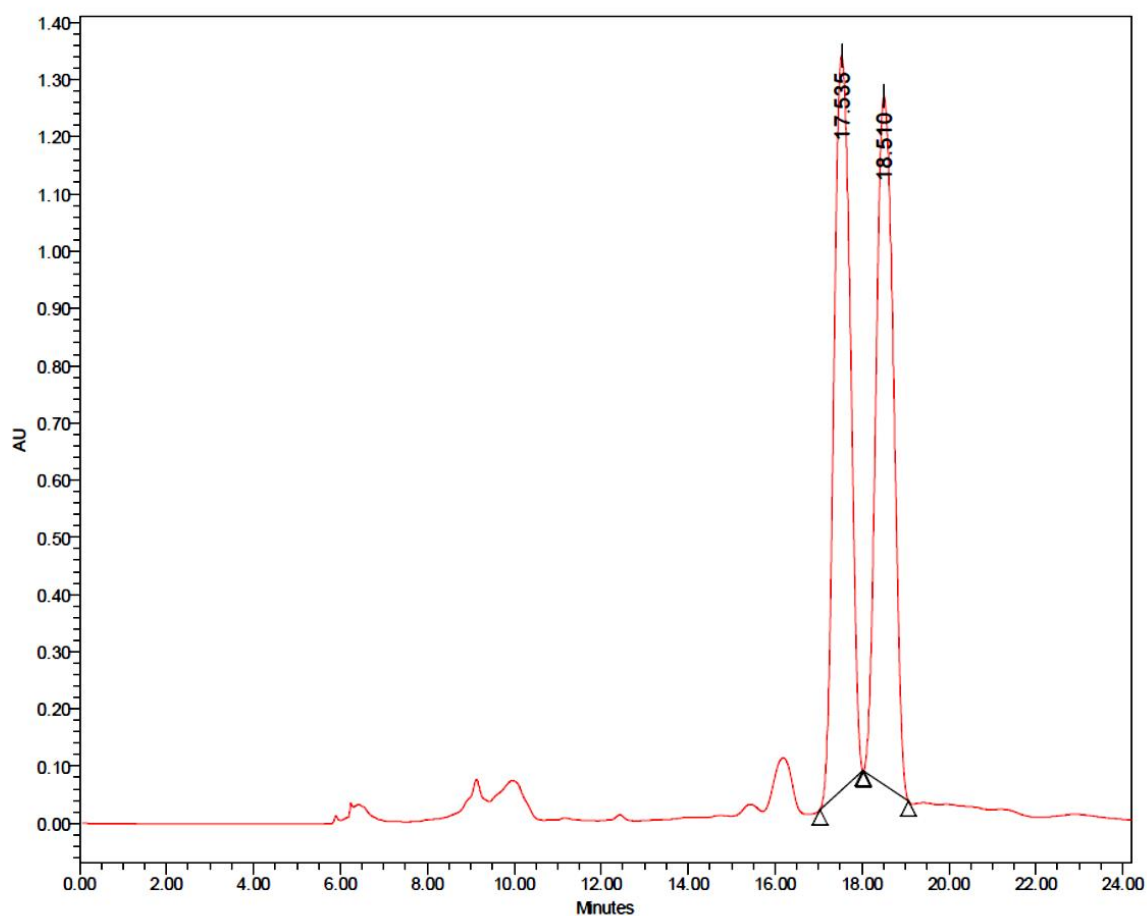

Sample Name: AB\_RN\_IC-3\_HEX\_0p5\_0324; Date Acquired: 30-12-2021 18:53:20 IST; Vial: 1; Injection 1

## Peak Summary with Statistics

Name:

|           | Sample Name             | Vial | Inj | Retention Time (min) | Area     | % Area | Height  |
|-----------|-------------------------|------|-----|----------------------|----------|--------|---------|
| 1         | AB_RN_IC-3_HEX_0p5_0324 | 1    | 1   | 18.510               | 33519938 | 49.94  | 1203537 |
| 2         | AB_RN_IC-3_HEX_0p5_0324 | 1    | 1   | 17.535               | 33603619 | 50.06  | 1284144 |
| Mean      |                         |      |     | 18.022               |          |        |         |
| Std. Dev. |                         |      |     | 0.690                |          |        |         |

Reported by User: System  
 Report Method: Peak Summary Report  
 Report Method ID 1009  
 Page: 1 of 2

Project Name: AB Research Group  
 Date Printed:  
 09-07-2022  
 11:02:25 Asia/Calcutta

HPLC data for (±)-14

## Peak Summary Report

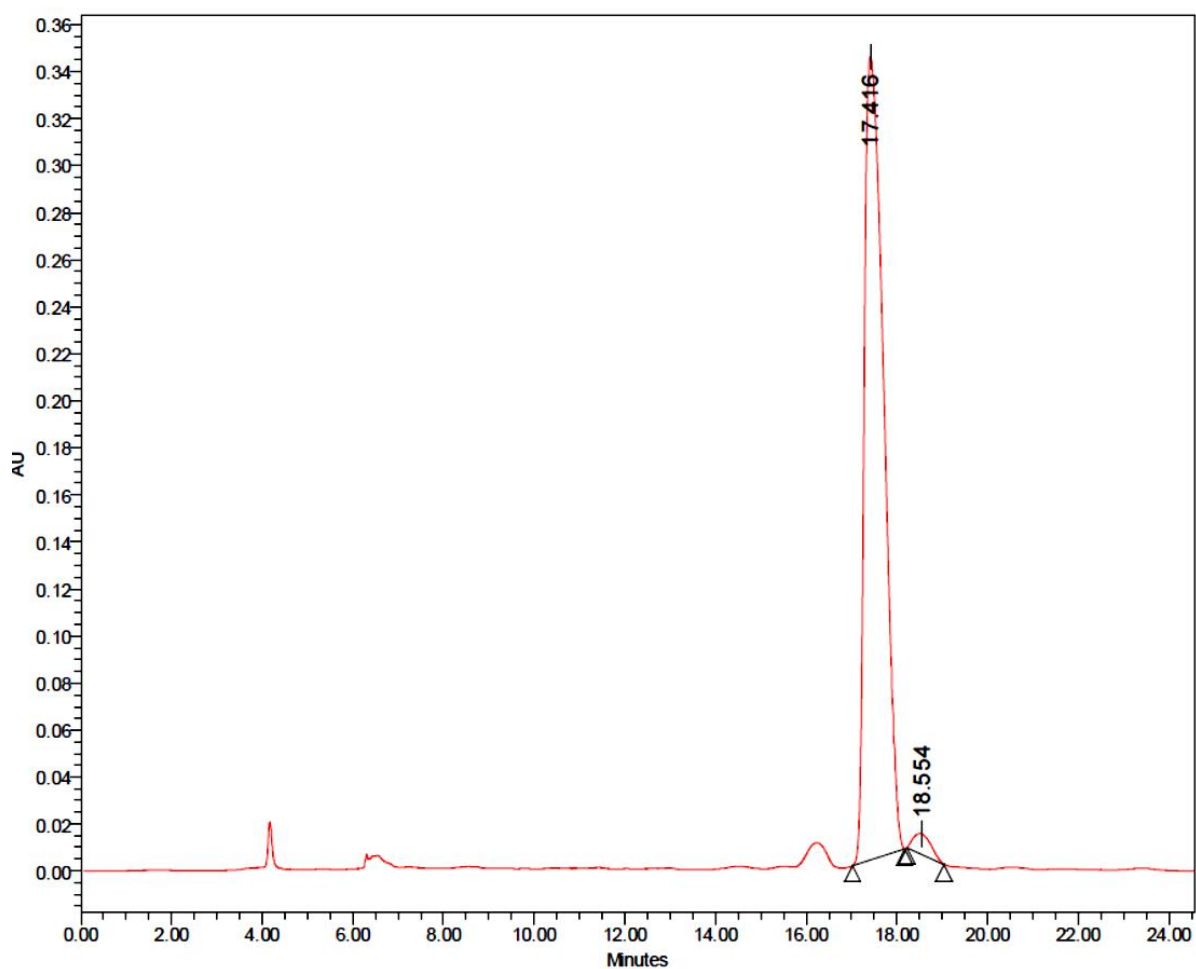

Sample Name: AB\_RN\_IC-3\_HEX\_0p5\_0285\_CHI; Date Acquired: 30-12-2021 19:19:05 IST; Vial: 1  
Injection: 2

## Peak Summary with Statistics

Name:

|           | Sample Name                 | Vial | Inj | Retention Time (min) | Area    | % Area | Height |
|-----------|-----------------------------|------|-----|----------------------|---------|--------|--------|
| 1         | AB_RN_IC-3_HEX_0p5_0285_CHI | 1    | 2   | 18.554               | 239229  | 2.34   | 8678   |
| 2         | AB_RN_IC-3_HEX_0p5_0285_CHI | 1    | 2   | 17.416               | 9977366 | 97.66  | 341559 |
| Mean      |                             |      |     | 17.985               |         |        |        |
| Std. Dev. |                             |      |     | 0.804                |         |        |        |

Reported by User: System  
Report Method: Peak Summary Report  
Report Method ID 1009  
Page: 1 of 2

Project Name: AB Research Group  
Date Printed:  
02-01-2022  
16:05:25 Asia/Calcutta

HPLC data for (–)-14



## Display Report

## Analysis Info

Analysis Name D:\Data\User\_data\2021\JAN\AB-AYA-RN-0107R.d

Method Tune\_pos\_Standard.m

Sample Name AB-AYA-RN-0107R

Comment

Acquisition Date 1/13/2021 11:46:36 AM

Operator IISER Kolkata

Instrument maXis impact 8282001.00127

## Acquisition Parameter

|             |          |                      |          |                  |           |
|-------------|----------|----------------------|----------|------------------|-----------|
| Source Type | ESI      | Ion Polarity         | Positive | Set Nebulizer    | 0.5 Bar   |
| Focus       | Active   | Set Capillary        | 3400 V   | Set Dry Heater   | 200 °C    |
| Scan Begin  | 50 m/z   | Set End Plate Offset | -500 V   | Set Dry Gas      | 4.0 l/min |
| Scan End    | 1000 m/z | Set Charging Voltage | 2000 V   | Set Divert Valve | Source    |
|             |          | Set Corona           | 0 nA     | Set APCI Heater  | 0 °C      |

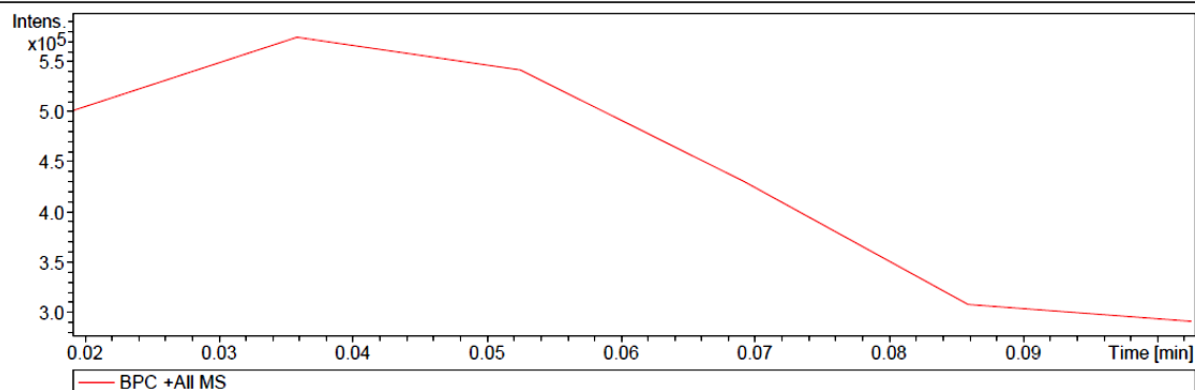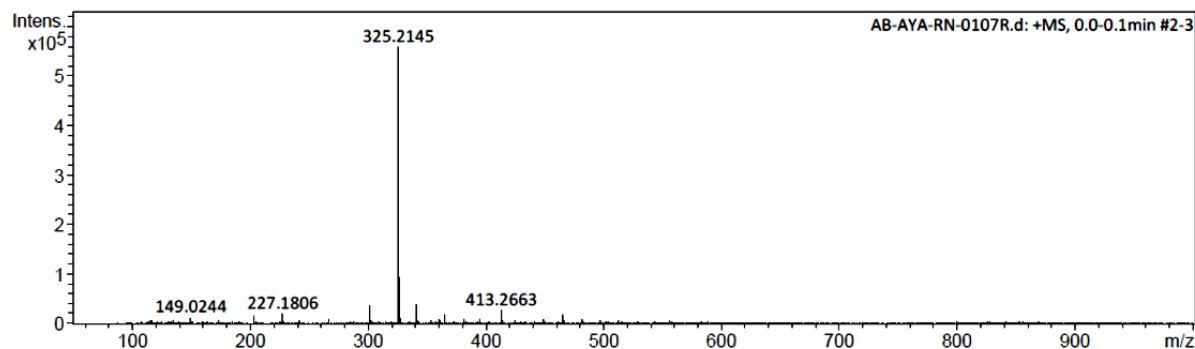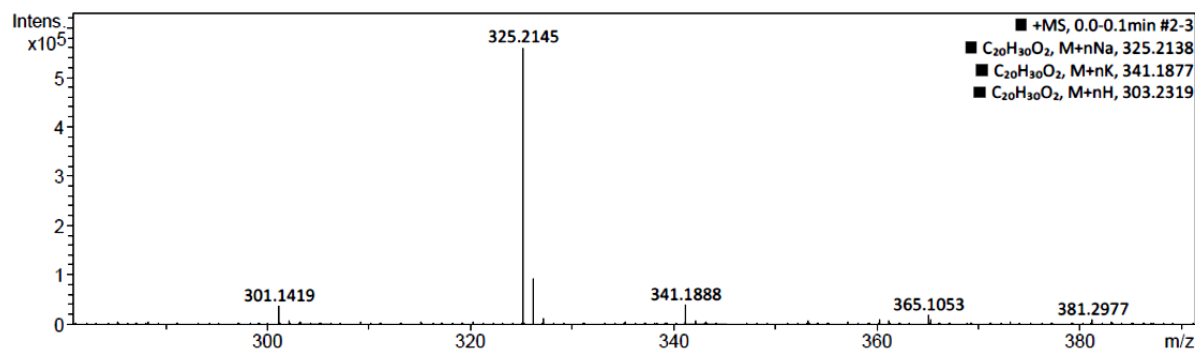

AB-AYA-RN-0107R.d

Bruker Compass DataAnalysis 4.1

printed: 1/13/2021 11:50:22 AM

by: IISER Kolkata

Page 1 of 1

HRMS Data of (–)-14

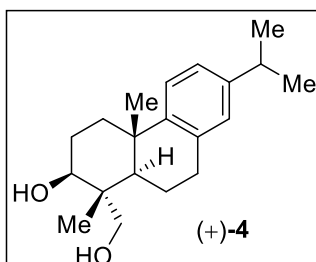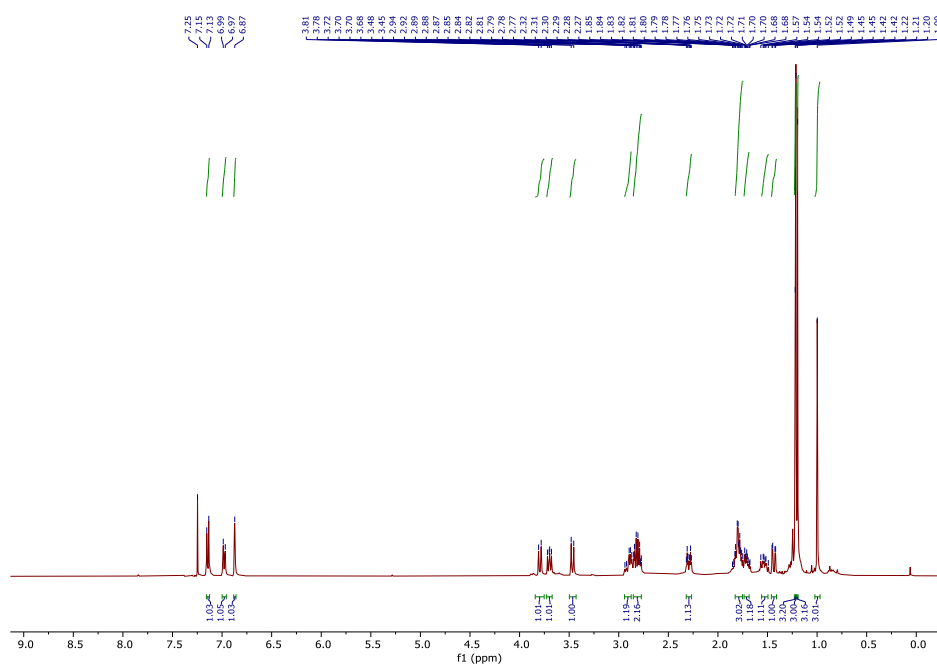

<sup>1</sup>H NMR (400 MHz, CDCl<sub>3</sub>) of (+)-4

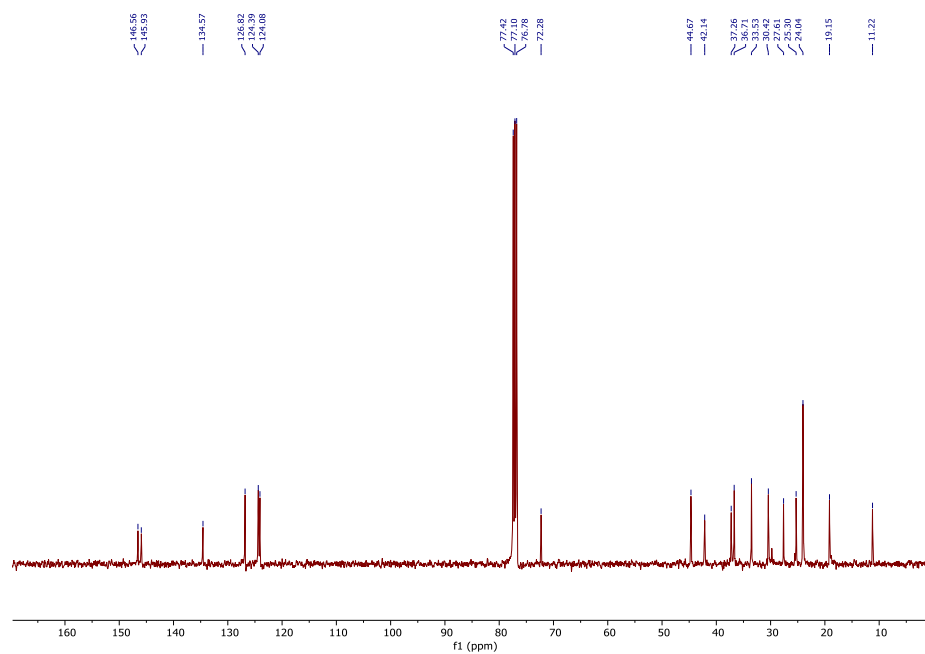

<sup>13</sup>C NMR (100 MHz, CDCl<sub>3</sub>) of (+)-4

## Display Report

## Analysis Info

Analysis Name D:\Data\User data\2021\JAN\AB-AYA-RN-0113R.d  
Method Tune\_pos\_Standard.m  
Sample Name AB-AYA-RN-0113R  
Comment

Acquisition Date 1/18/2021 1:37:04 PM

Operator IISER Kolkata  
Instrument maXis impact 8282001.00127

## Acquisition Parameter

|             |          |                      |          |                  |           |
|-------------|----------|----------------------|----------|------------------|-----------|
| Source Type | ESI      | Ion Polarity         | Positive | Set Nebulizer    | 0.5 Bar   |
| Focus       | Active   | Set Capillary        | 3400 V   | Set Dry Heater   | 200 °C    |
| Scan Begin  | 50 m/z   | Set End Plate Offset | -500 V   | Set Dry Gas      | 4.0 l/min |
| Scan End    | 1000 m/z | Set Charging Voltage | 2000 V   | Set Divert Valve | Source    |
|             |          | Set Corona           | 0 nA     | Set APCI Heater  | 0 °C      |

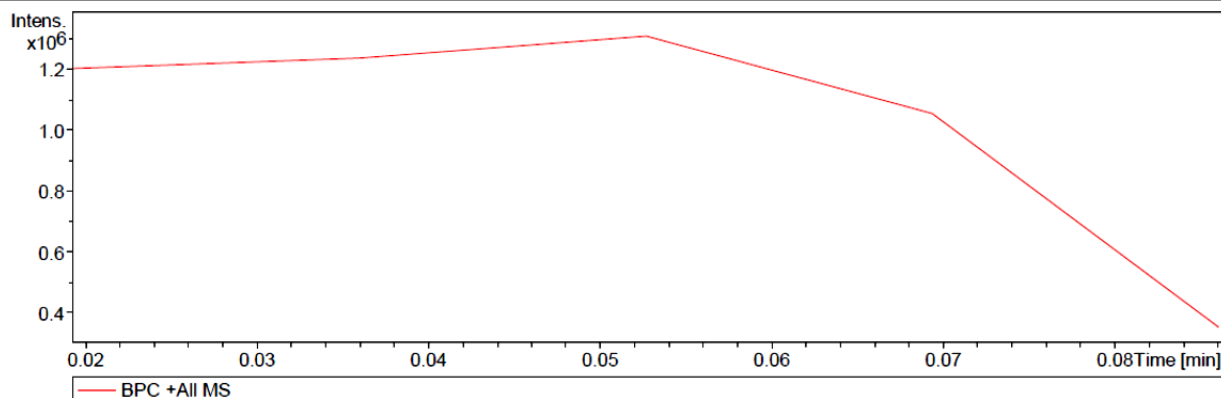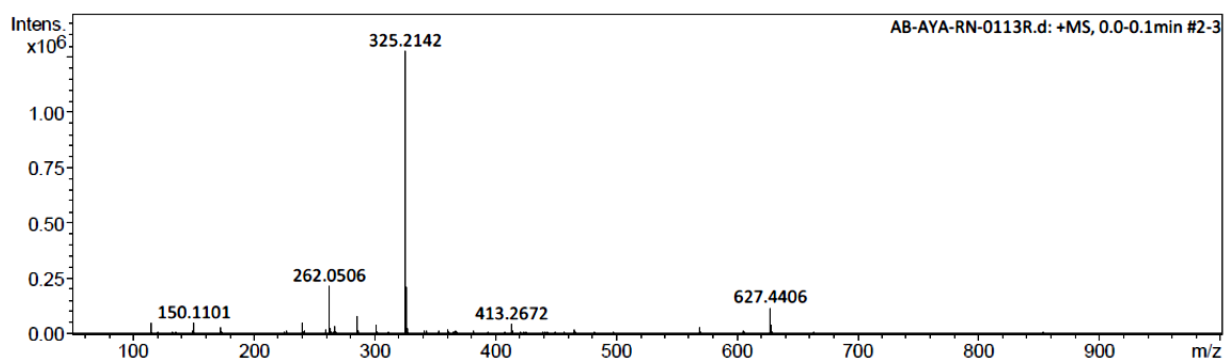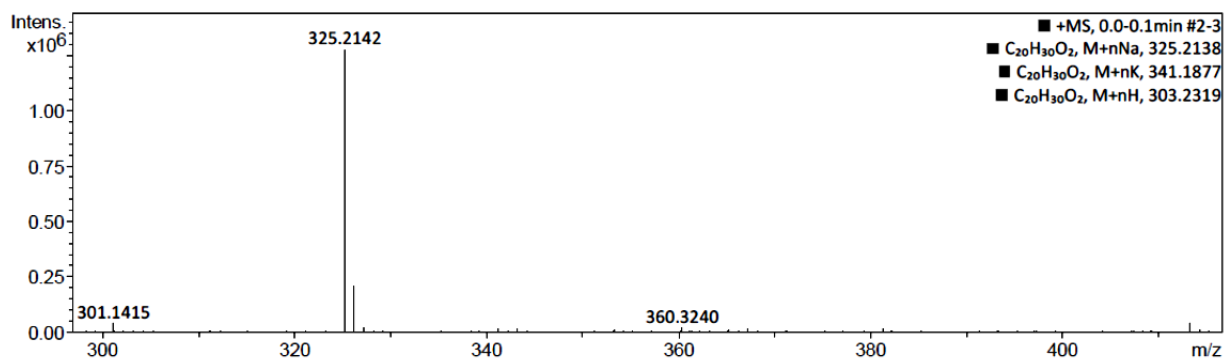

AB-AYA-RN-0113R.d

Bruker Compass DataAnalysis 4.1

printed: 1/18/2021 1:40:01 PM

by: IISER Kolkata

Page 1 of 1

HRMS data of (+)-4

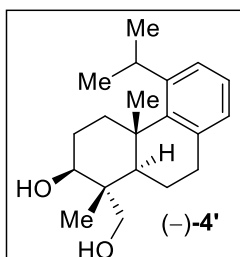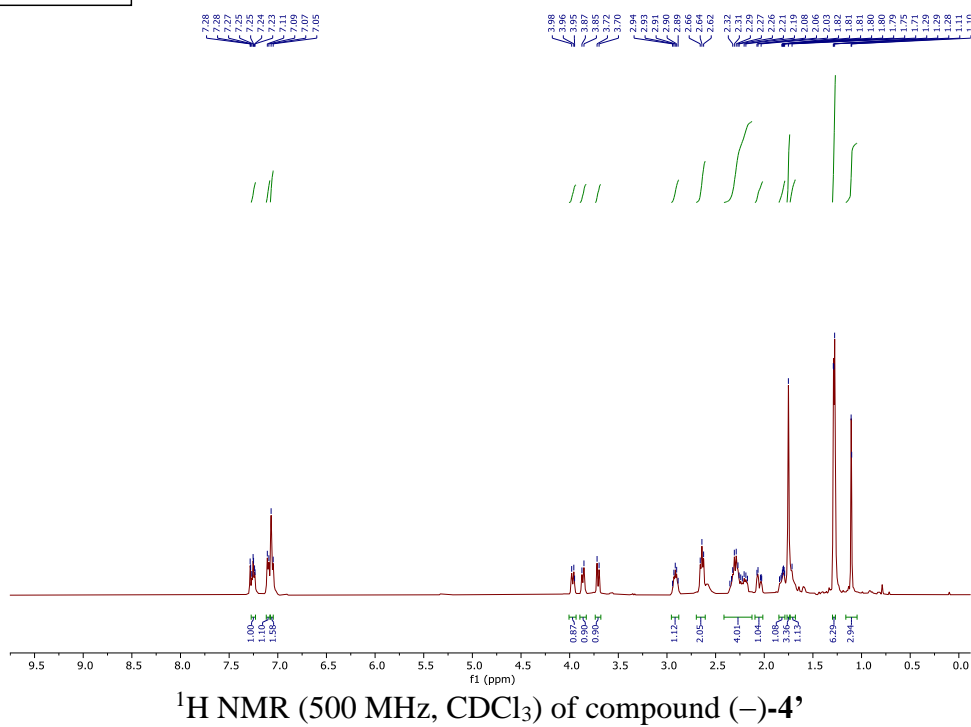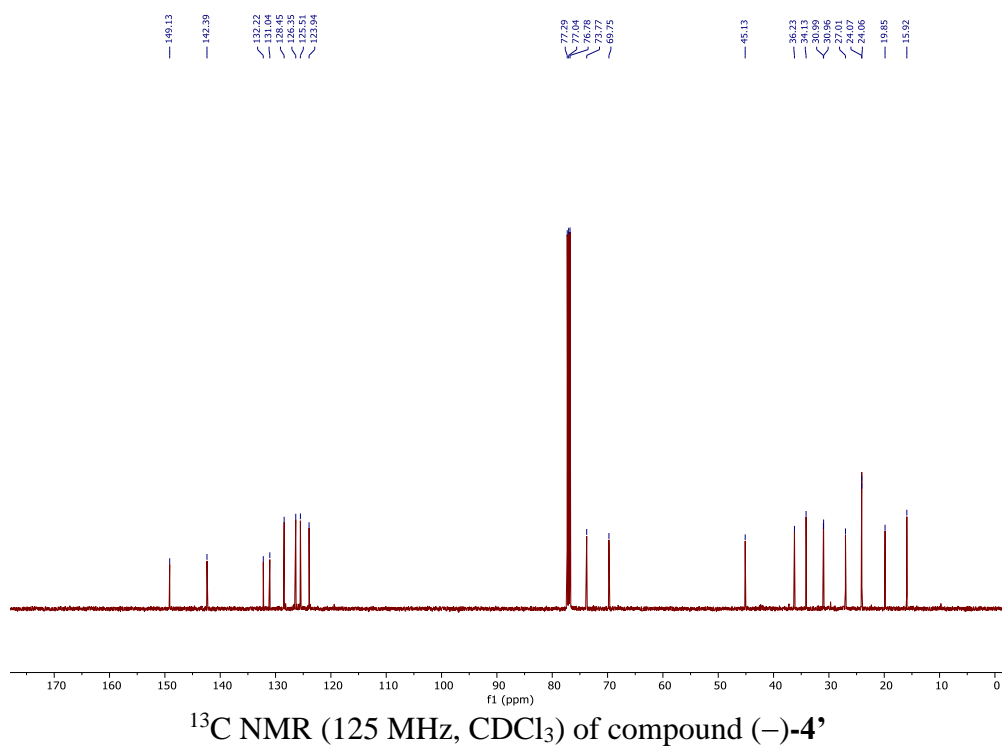

## Display Report

## Analysis Info

Analysis Name D:\Data\User\_data\2022\JULY\ab\_m\_0187\_2ip.d

Method Tune\_pos\_Standard\_July2022.m

Sample Name ab\_m\_0187\_2ip

Comment

Acquisition Date 7/18/2022 10:26:57 AM

Operator IISER Kolkata

Instrument maXis impact 8282001.00127

## Acquisition Parameter

|             |          |                      |          |                  |           |
|-------------|----------|----------------------|----------|------------------|-----------|
| Source Type | ESI      | Ion Polarity         | Positive | Set Nebulizer    | 0.4 Bar   |
| Focus       | Active   | Set Capillary        | 4500 V   | Set Dry Heater   | 200 °C    |
| Scan Begin  | 50 m/z   | Set End Plate Offset | -500 V   | Set Dry Gas      | 4.0 l/min |
| Scan End    | 1000 m/z | Set Charging Voltage | 2000 V   | Set Divert Valve | Source    |
|             |          | Set Corona           | 0 nA     | Set APCI Heater  | 0 °C      |

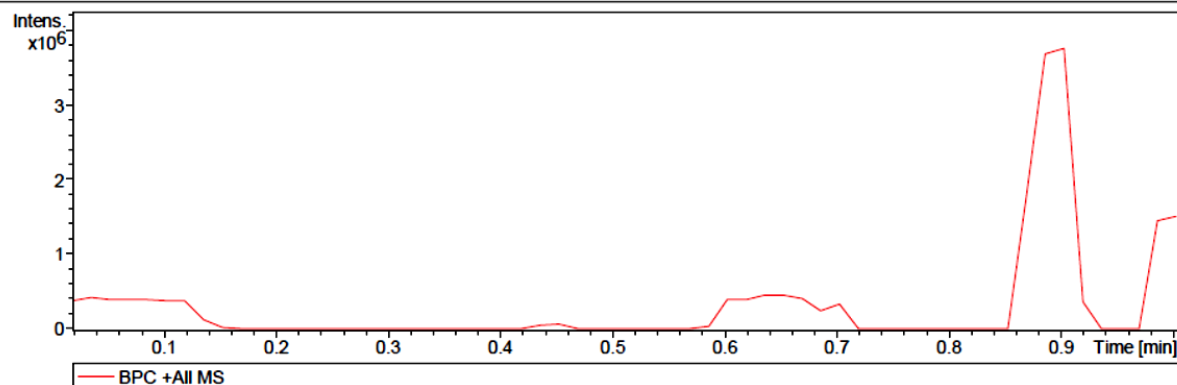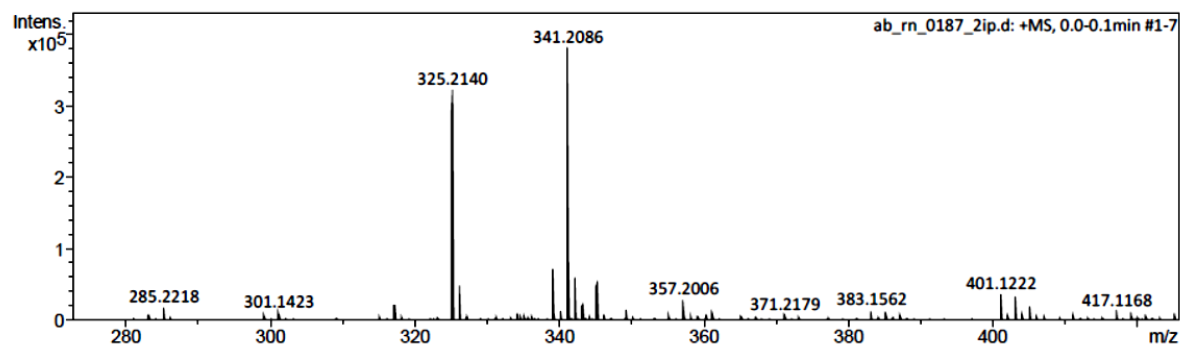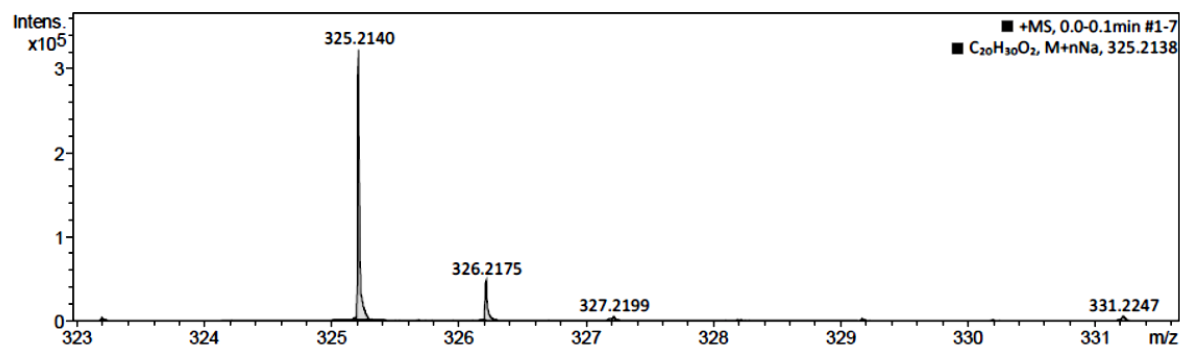

ab\_m\_0187\_2ip.d

Bruker Compass DataAnalysis 4.1

printed: 7/18/2022 10:31:48 AM

by: IISER Kolkata

Page 1 of 1

HRMS data of (-)-4'

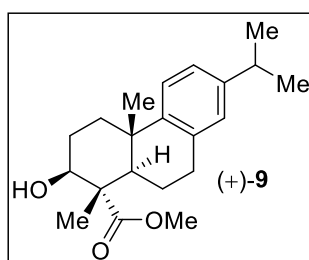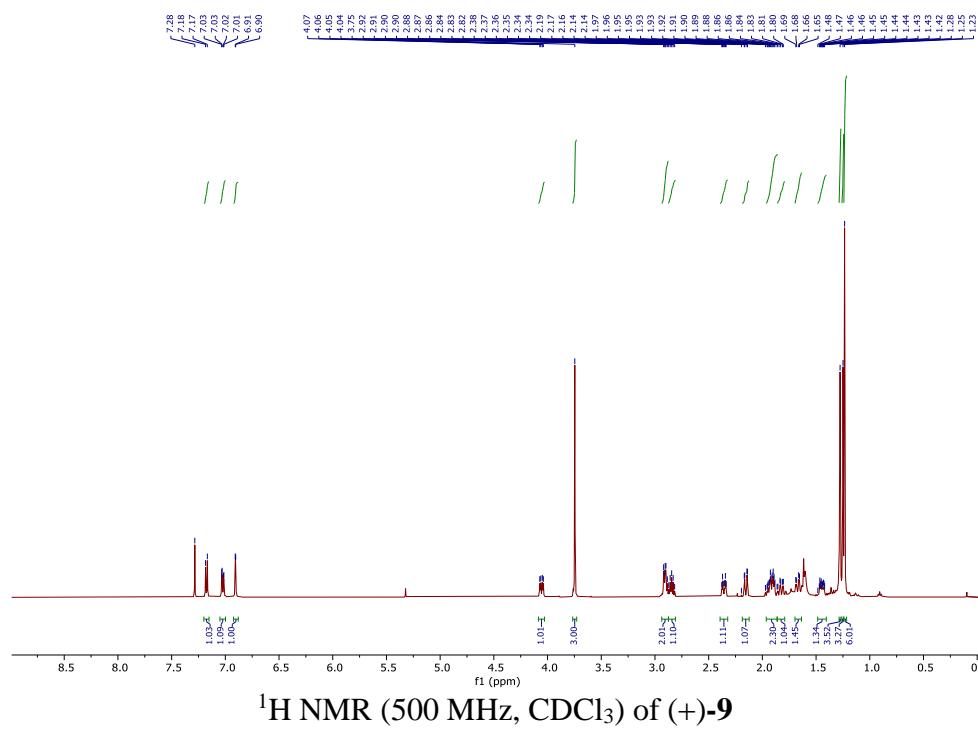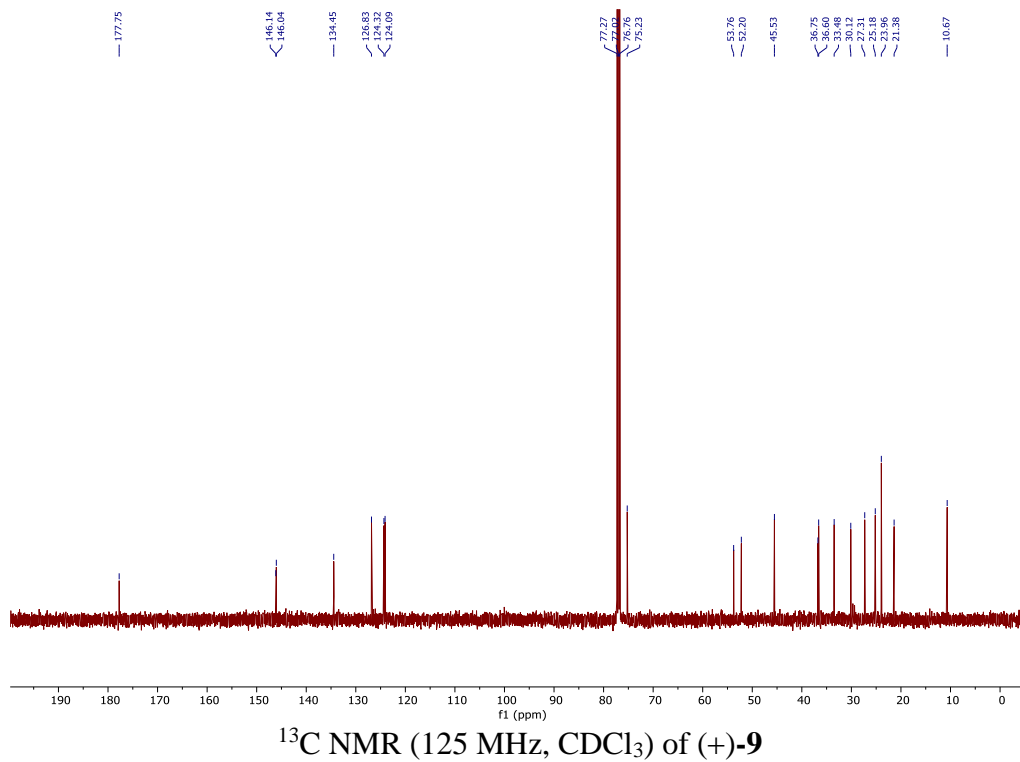

## Display Report

## Analysis Info

Analysis Name D:\Data\User data\2021\JAN\AB-AYA-RN-0129.d  
Method Tune\_pos\_Mid.m  
Sample Name AB-AYA-RN-0129  
Comment

Acquisition Date 1/27/2021 2:42:29 PM

Operator IISER Kolkata  
Instrument maXis impact 8282001.00127

## Acquisition Parameter

|             |          |                      |          |                  |           |
|-------------|----------|----------------------|----------|------------------|-----------|
| Source Type | ESI      | Ion Polarity         | Positive | Set Nebulizer    | 0.4 Bar   |
| Focus       | Active   | Set Capillary        | 3400 V   | Set Dry Heater   | 200 °C    |
| Scan Begin  | 50 m/z   | Set End Plate Offset | -500 V   | Set Dry Gas      | 4.0 l/min |
| Scan End    | 3000 m/z | Set Charging Voltage | 2000 V   | Set Divert Valve | Source    |
|             |          | Set Corona           | 0 nA     | Set APCI Heater  | 0 °C      |

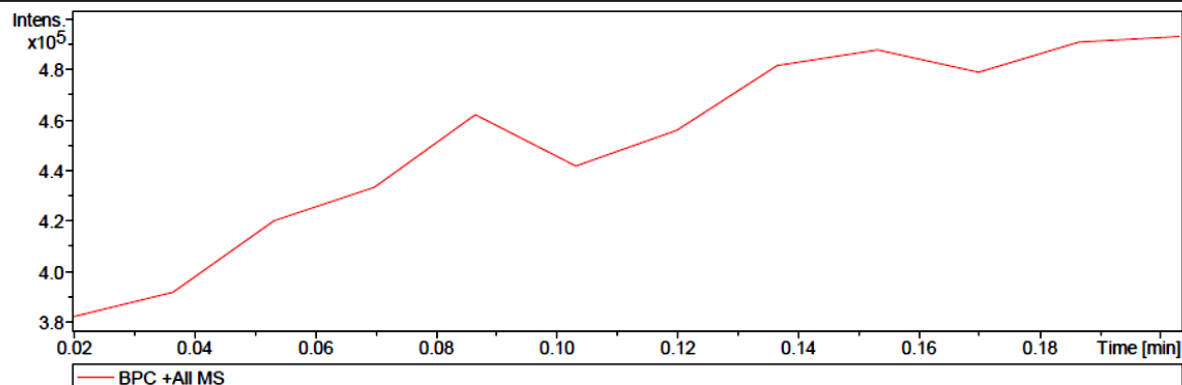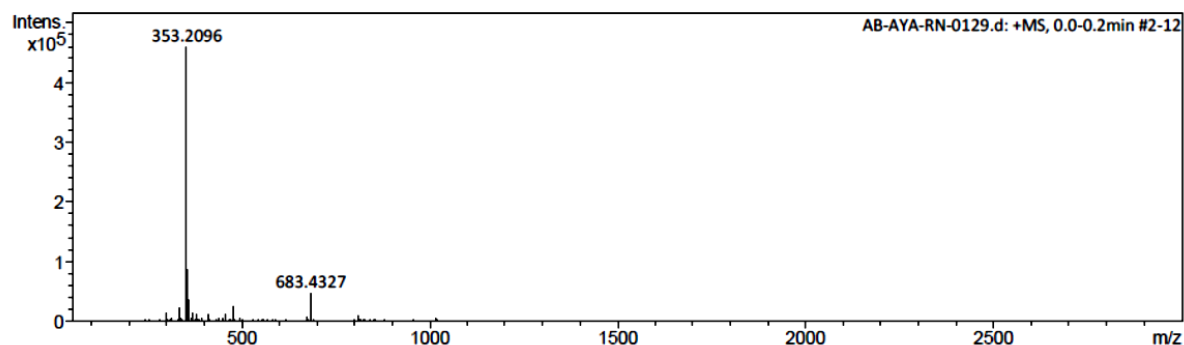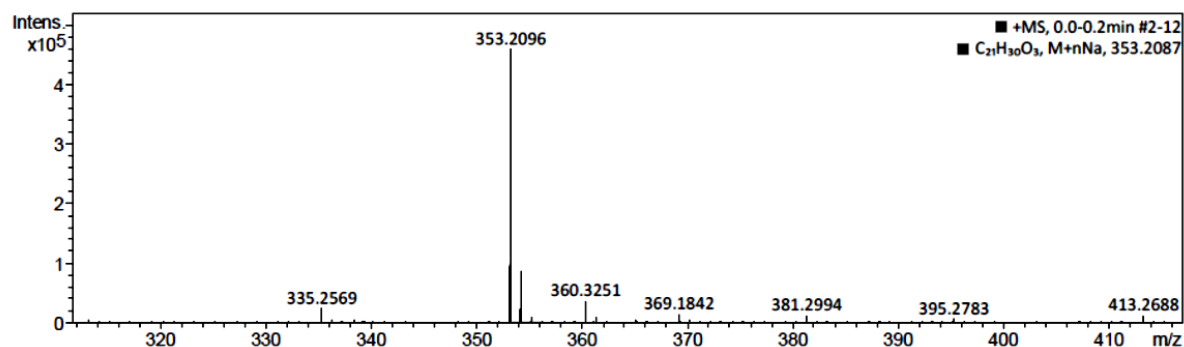

AB-AYA-RN-0129.d

Bruker Compass DataAnalysis 4.1

printed: 1/27/2021 2:48:40 PM

by: IISER Kolkata

Page 1 of 1

HRMS data of (+)-9

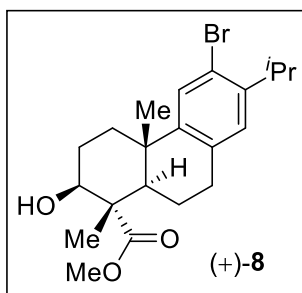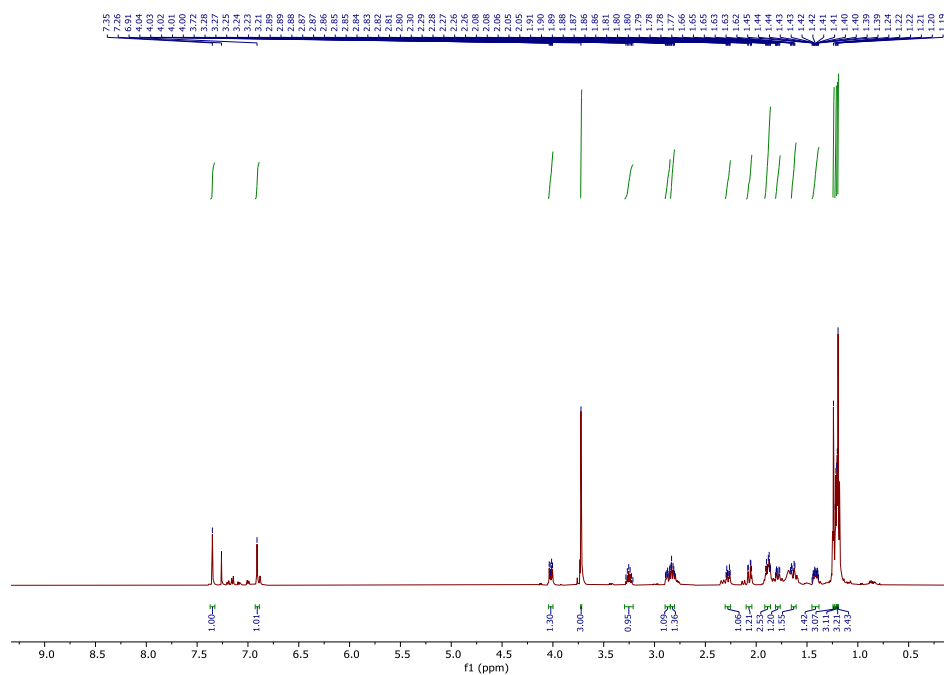<sup>1</sup>H NMR (500 MHz, CDCl<sub>3</sub>) of (+)-**8**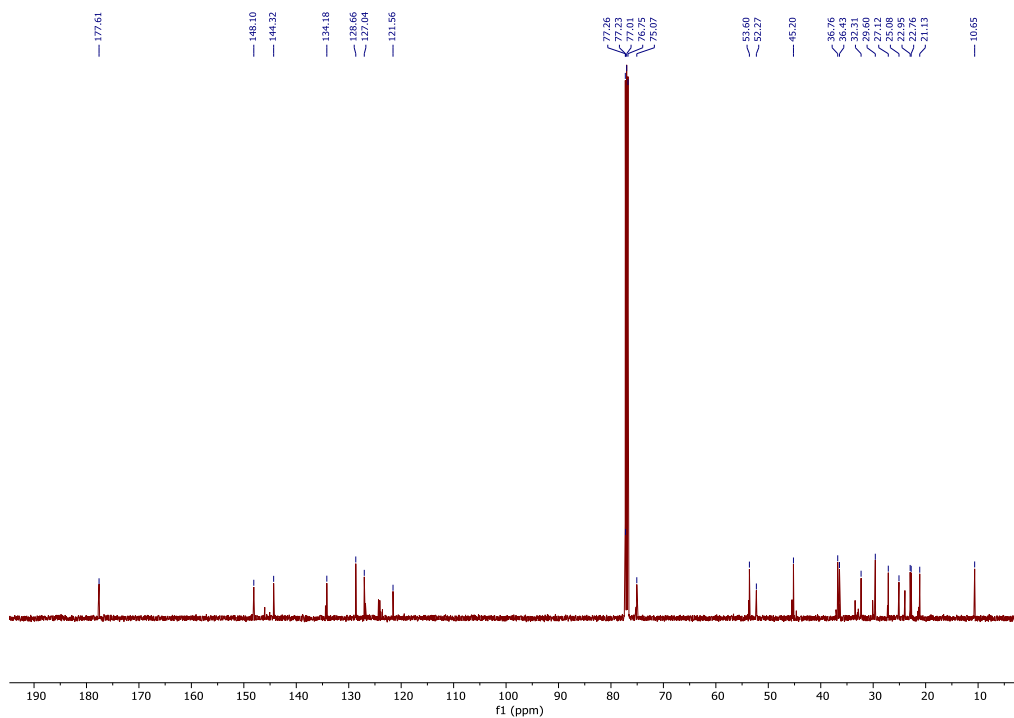<sup>13</sup>C NMR (125 MHz, CDCl<sub>3</sub>) of (+)-**8**



## Display Report

## Analysis Info

Analysis Name D:\Data\User data\2022\JAN\ab\_m\_0348.d  
Method Tune\_pos\_Standard.m  
Sample Name ab\_m\_0348  
Comment

Acquisition Date 1/25/2022 10:56:53 AM  
Operator IISER Kolkata  
Instrument maXis impact 8282001.00127

## Acquisition Parameter

|             |          |                      |          |                  |           |
|-------------|----------|----------------------|----------|------------------|-----------|
| Source Type | ESI      | Ion Polarity         | Positive | Set Nebulizer    | 0.5 Bar   |
| Focus       | Active   | Set Capillary        | 3400 V   | Set Dry Heater   | 200 °C    |
| Scan Begin  | 50 m/z   | Set End Plate Offset | -500 V   | Set Dry Gas      | 4.0 l/min |
| Scan End    | 1000 m/z | Set Charging Voltage | 2000 V   | Set Divert Valve | Source    |
|             |          | Set Corona           | 0 nA     | Set APCI Heater  | 0 °C      |

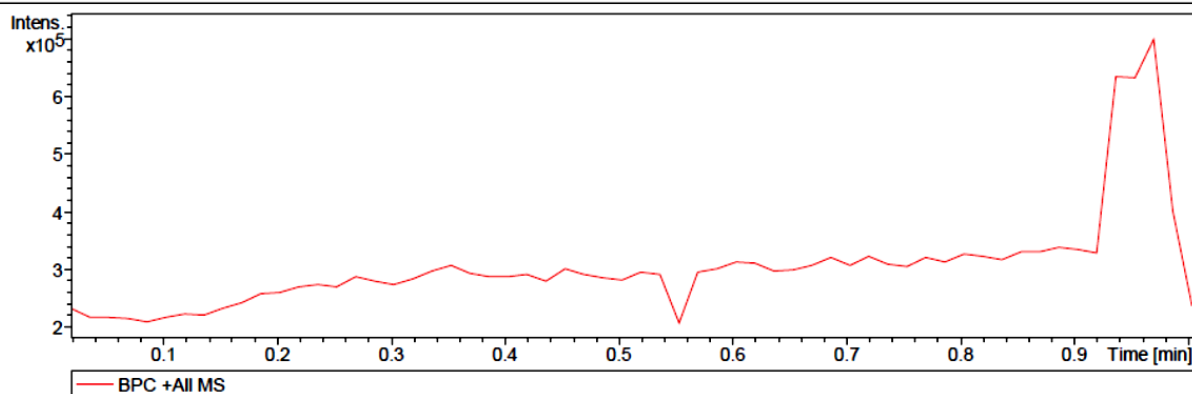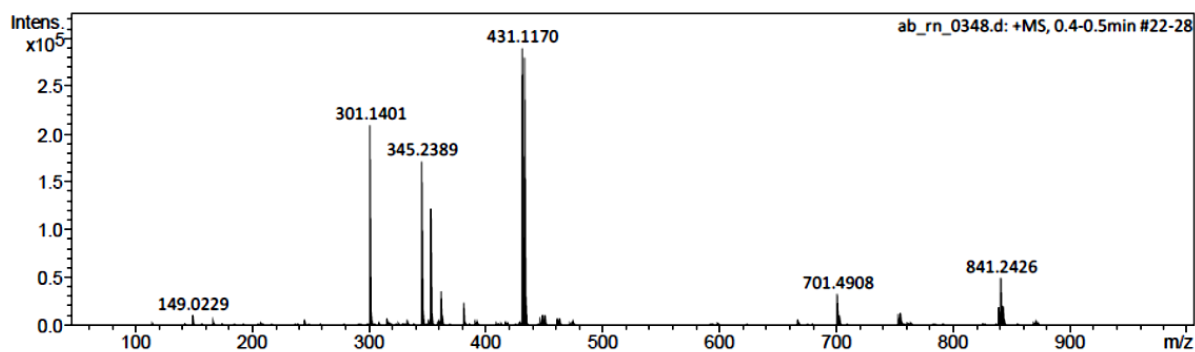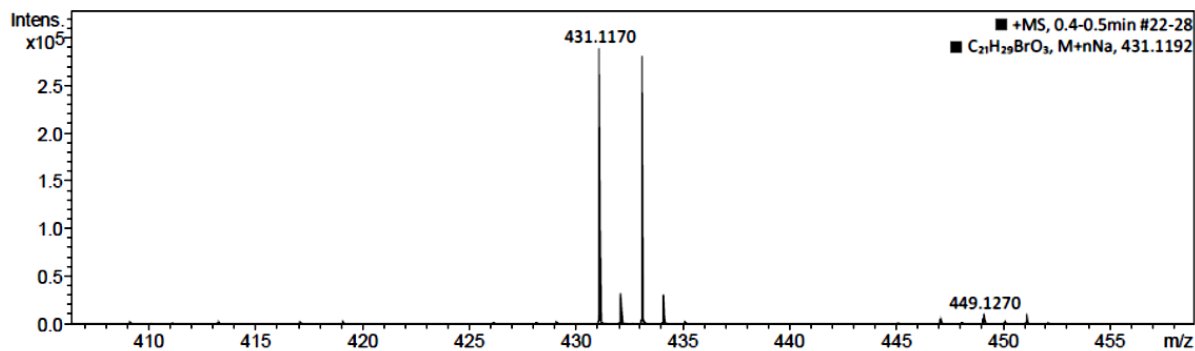

ab\_m\_0348.d

Bruker Compass DataAnalysis 4.1

printed: 1/25/2022 11:36:09 AM

by: IISER Kolkata

Page 1 of 1

HRMS data of (+)-8

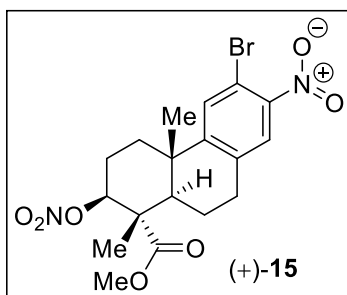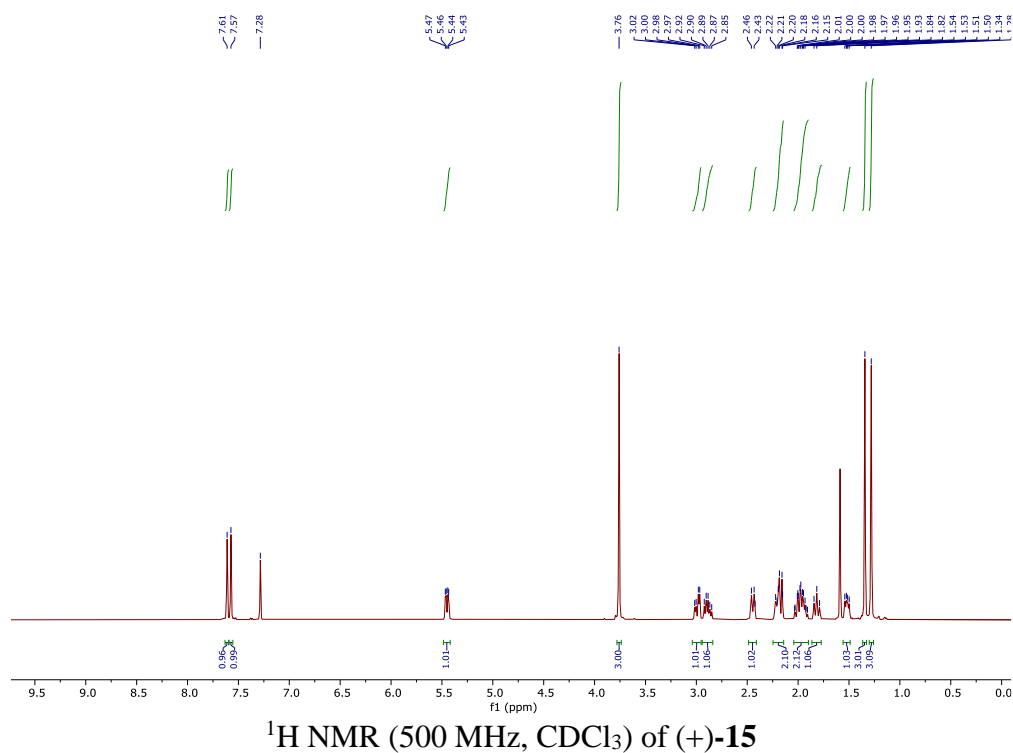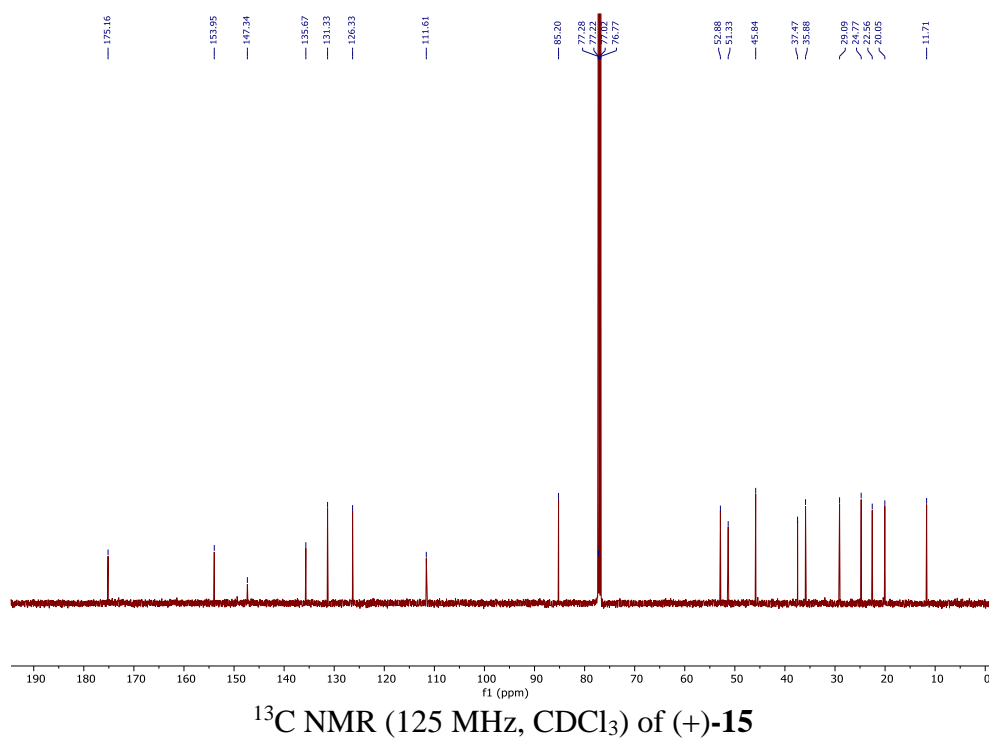

## Display Report

## Analysis Info

Analysis Name D:\Data\User data\2022\FEB\lab\_m\_0201.d  
Method Tune\_pos\_Standard.m  
Sample Name ab\_m\_0201  
Comment signal dropping issue

Acquisition Date 2/21/2022 10:50:15 AM

Operator IISER Kolkata  
Instrument maXis impact 8282001.00127

## Acquisition Parameter

|             |          |                      |          |                  |           |
|-------------|----------|----------------------|----------|------------------|-----------|
| Source Type | ESI      | Ion Polarity         | Positive | Set Nebulizer    | 0.5 Bar   |
| Focus       | Active   | Set Capillary        | 3400 V   | Set Dry Heater   | 200 °C    |
| Scan Begin  | 50 m/z   | Set End Plate Offset | -500 V   | Set Dry Gas      | 4.0 l/min |
| Scan End    | 1000 m/z | Set Charging Voltage | 2000 V   | Set Divert Valve | Source    |
|             |          | Set Corona           | 0 nA     | Set APCI Heater  | 0 °C      |

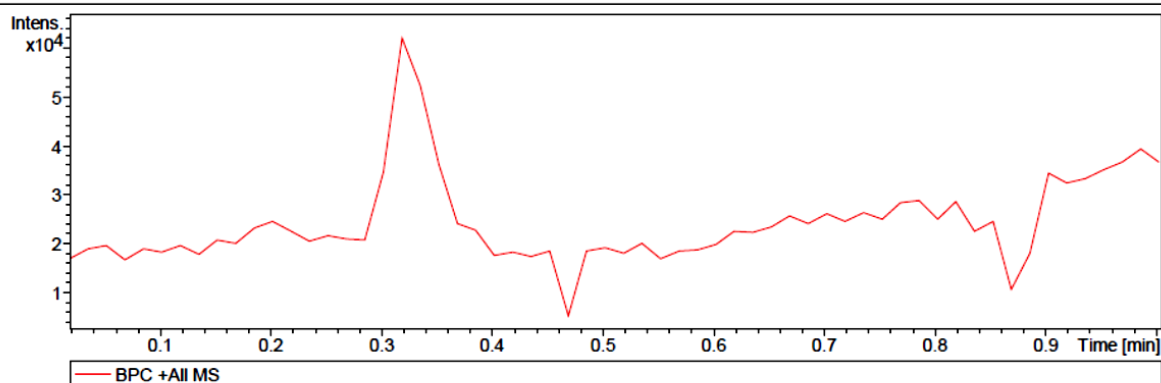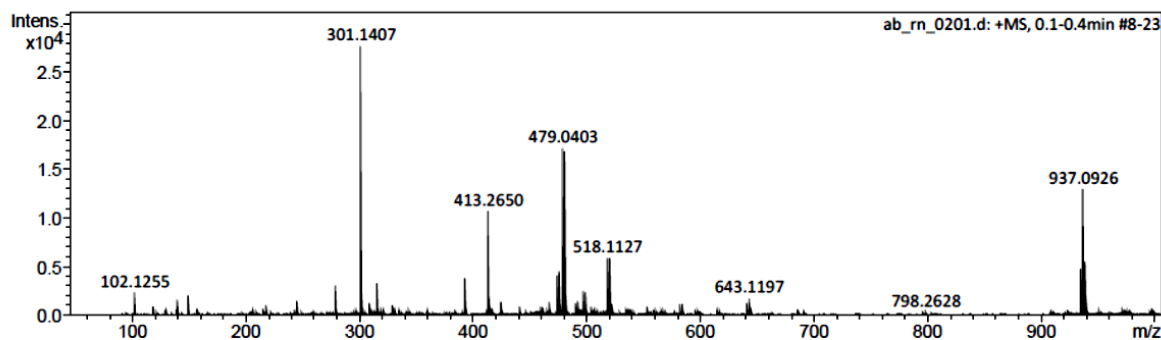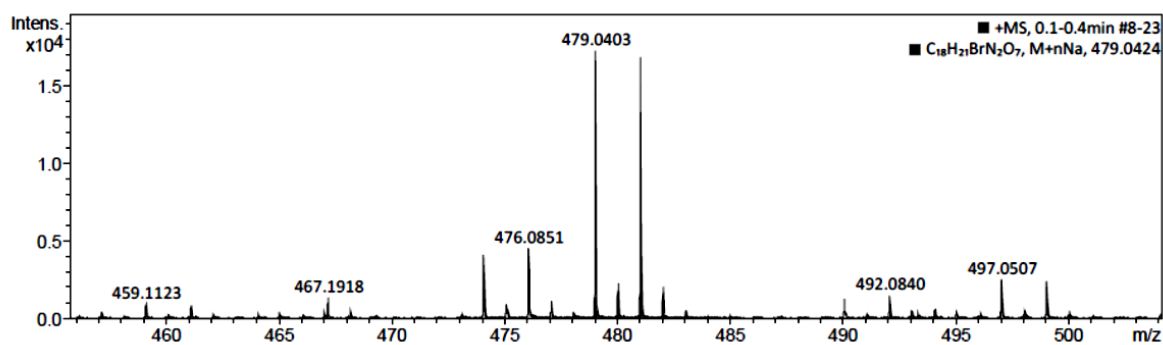

ab\_m\_0201.d  
Bruker Compass DataAnalysis 4.1

printed: 2/21/2022 10:53:45 AM

by: IISER Kolkata

Page 1 of 1

HRMS data of (+)-15

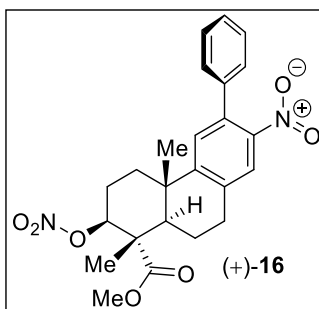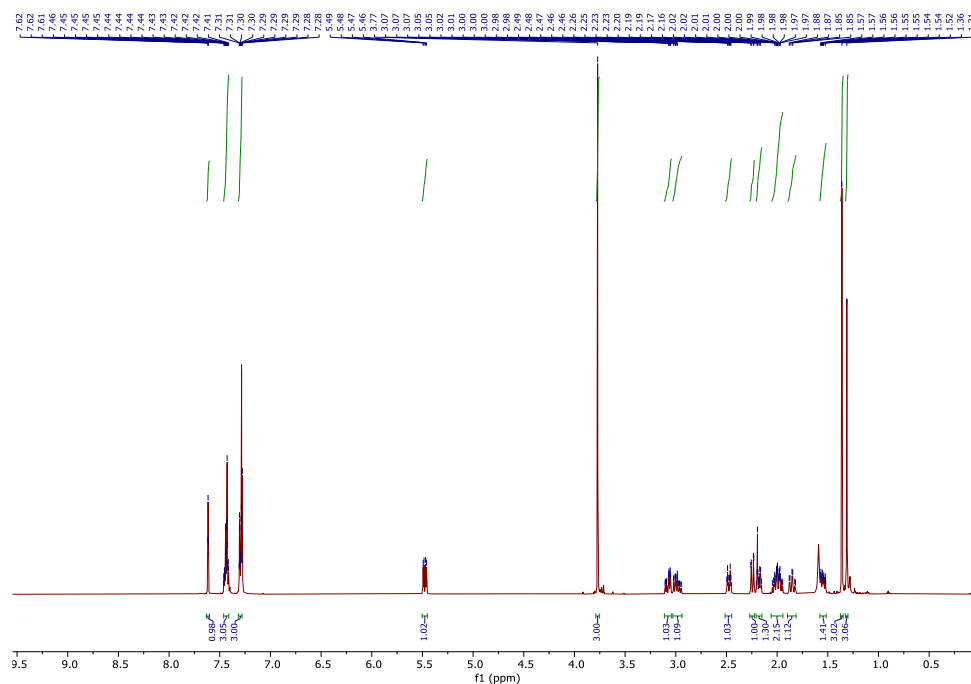

## Display Report

## Analysis Info

Analysis Name D:\Data\User data\2022\FEB\AB\_RN\_0202.d  
Method Tune\_pos\_Standard.m  
Sample Name AB\_RN\_0202  
Comment

Acquisition Date 2/18/2022 11:59:02 AM

Operator IISER Kolkata  
Instrument maXis impact 8282001.00127

## Acquisition Parameter

|             |          |                      |          |                  |           |
|-------------|----------|----------------------|----------|------------------|-----------|
| Source Type | ESI      | Ion Polarity         | Positive | Set Nebulizer    | 0.5 Bar   |
| Focus       | Active   | Set Capillary        | 3400 V   | Set Dry Heater   | 200 °C    |
| Scan Begin  | 50 m/z   | Set End Plate Offset | -500 V   | Set Dry Gas      | 4.0 l/min |
| Scan End    | 1000 m/z | Set Charging Voltage | 2000 V   | Set Divert Valve | Source    |
|             |          | Set Corona           | 0 nA     | Set APCI Heater  | 0 °C      |

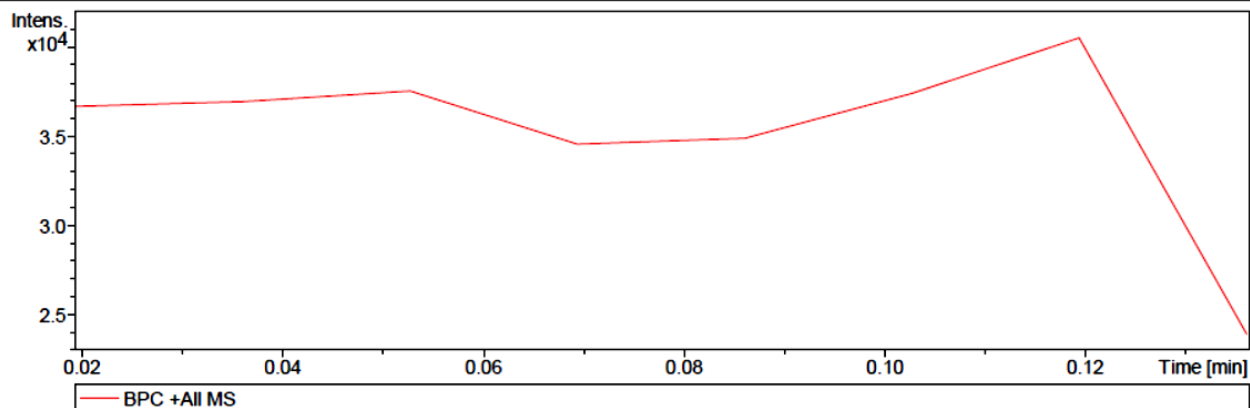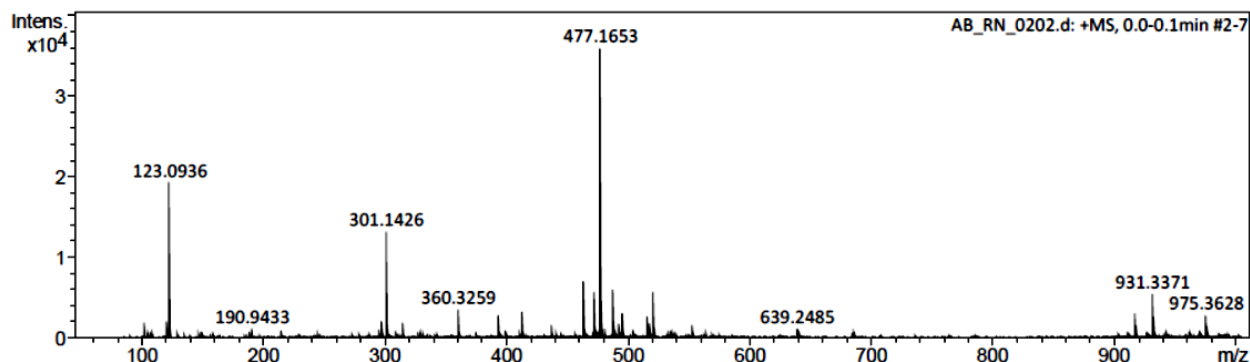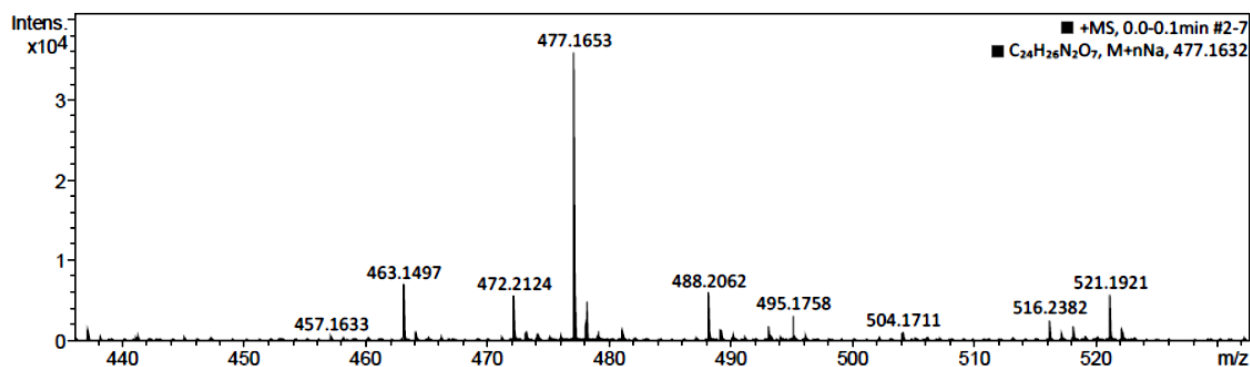

AB\_RN\_0202.d

Bruker Compass DataAnalysis 4.1

printed: 2/18/2022 12:02:53 PM

by: IISER Kolkata

Page 1 of 1

HRMS data of (+)-16

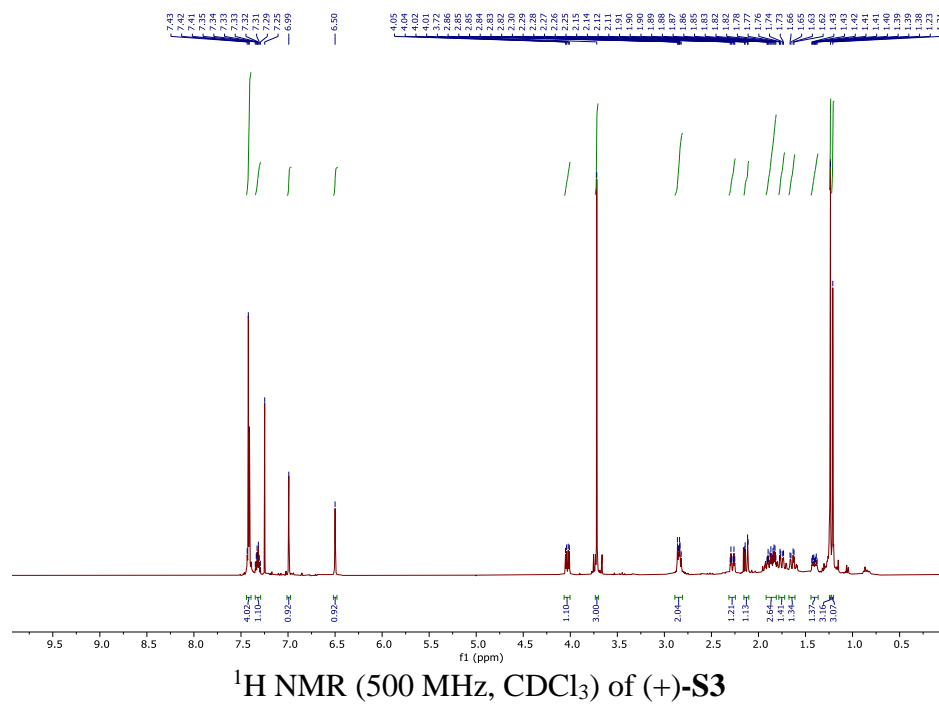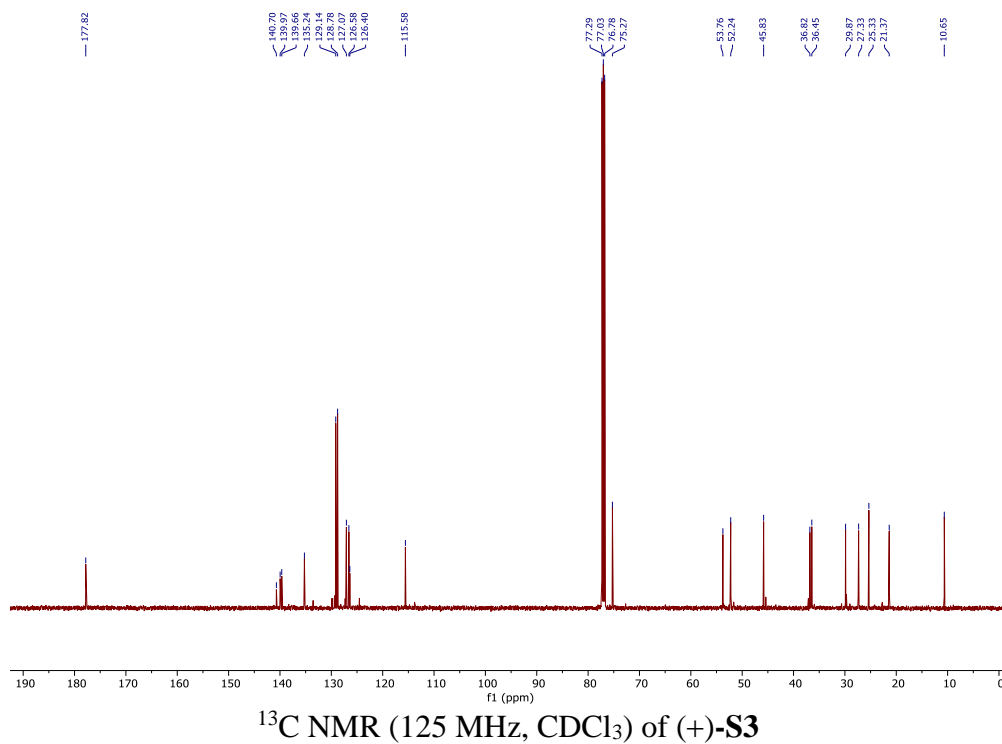

## Display Report

## Analysis Info

Analysis Name D:\Data\User data\2021\JULY\AB\_RN\_0203\_1.d  
Method Tune\_pos\_Standard.m  
Sample Name RN\_0203  
Comment

Acquisition Date 7/16/2021 6:44:03 PM  
Operator IISER Kolkata  
Instrument maXis impact 8282001.00127

## Acquisition Parameter

|             |          |                      |          |                  |           |
|-------------|----------|----------------------|----------|------------------|-----------|
| Source Type | ESI      | Ion Polarity         | Positive | Set Nebulizer    | 0.5 Bar   |
| Focus       | Active   | Set Capillary        | 3400 V   | Set Dry Heater   | 200 °C    |
| Scan Begin  | 50 m/z   | Set End Plate Offset | -500 V   | Set Dry Gas      | 4.0 l/min |
| Scan End    | 1000 m/z | Set Charging Voltage | 2000 V   | Set Divert Valve | Source    |
|             |          | Set Corona           | 0 nA     | Set APCI Heater  | 0 °C      |

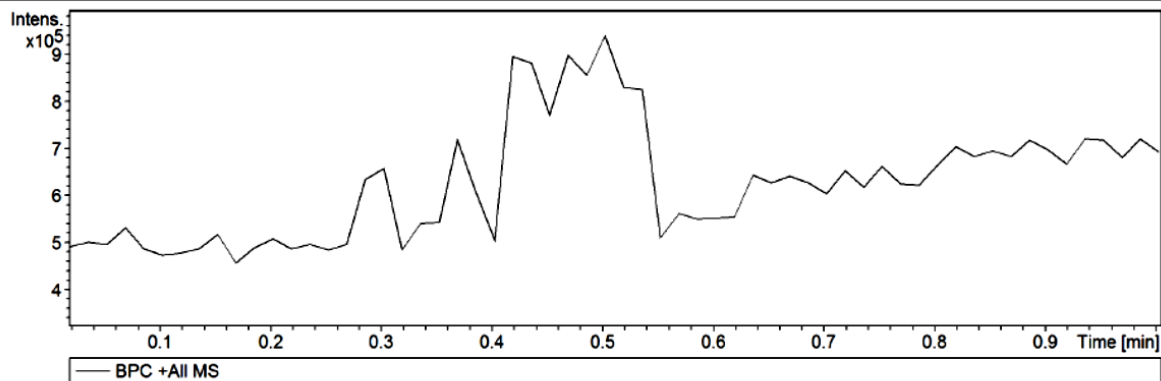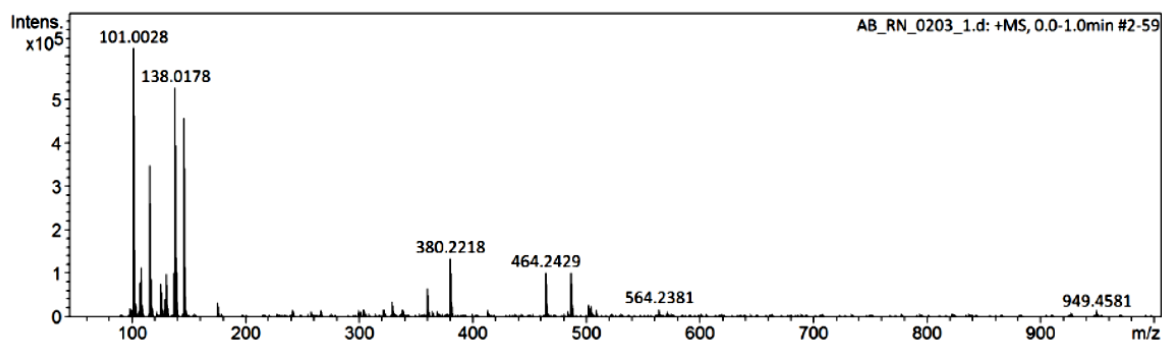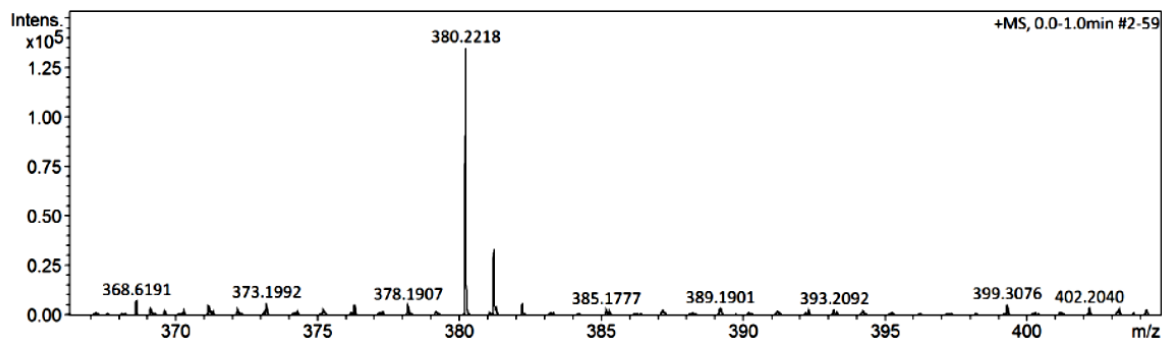

AB\_RN\_0203\_1.d

Bruker Compass DataAnalysis 4.1

printed: 7/19/2021 6:08:00 PM

by: IISER Kolkata

Page 1 of 1

HRMS data of (+)-S3

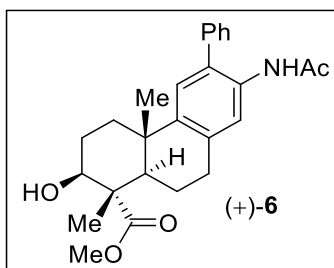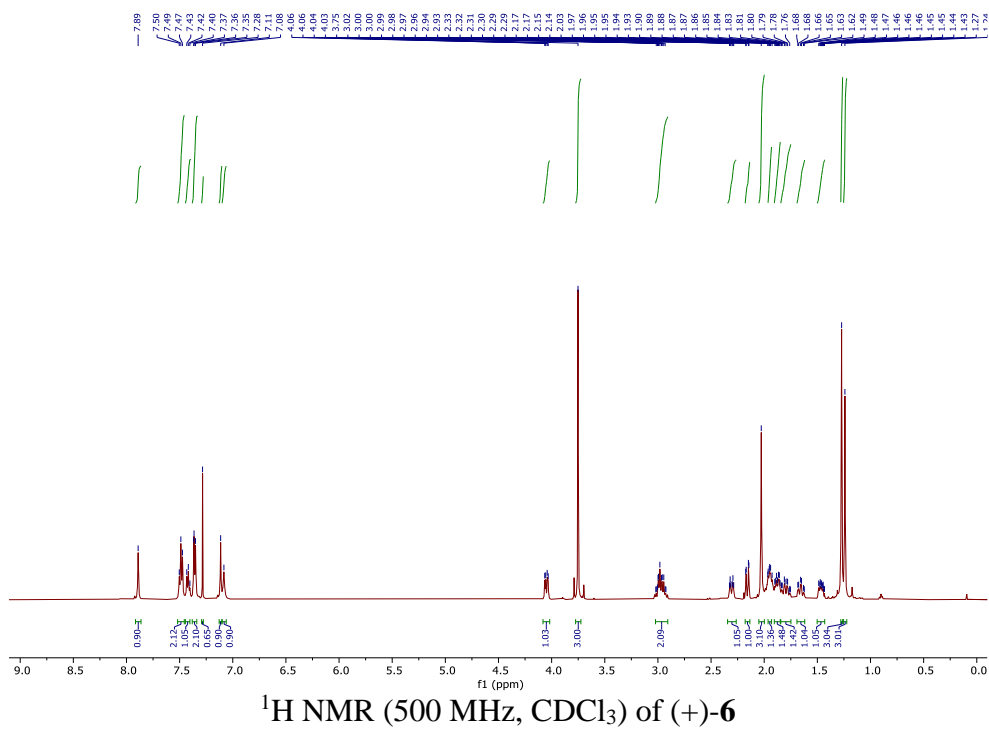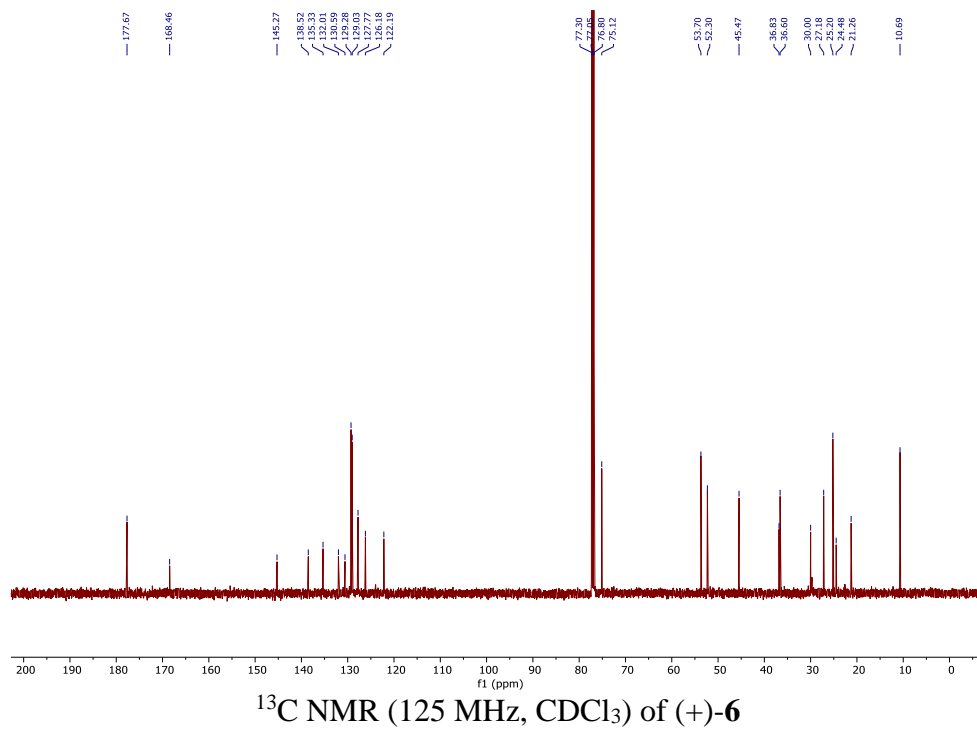



## Display Report

## Analysis Info

Analysis Name D:\Data\User data\2022\JAN\ab\_m\_0352.d  
 Method Tune\_pos\_Standard.m  
 Sample Name ab\_m\_0352  
 Comment hydrolyzed to aldehyde using quantitative TFA

Acquisition Date 1/31/2022 1:03:25 PM

Operator IISER Kolkata  
 Instrument maXis impact 8282001.00127

## Acquisition Parameter

|             |          |                      |          |                  |           |
|-------------|----------|----------------------|----------|------------------|-----------|
| Source Type | ESI      | Ion Polarity         | Positive | Set Nebulizer    | 0.5 Bar   |
| Focus       | Active   | Set Capillary        | 3400 V   | Set Dry Heater   | 200 °C    |
| Scan Begin  | 50 m/z   | Set End Plate Offset | -500 V   | Set Dry Gas      | 4.0 l/min |
| Scan End    | 1000 m/z | Set Charging Voltage | 2000 V   | Set Divert Valve | Source    |
|             |          | Set Corona           | 0 nA     | Set APCI Heater  | 0 °C      |

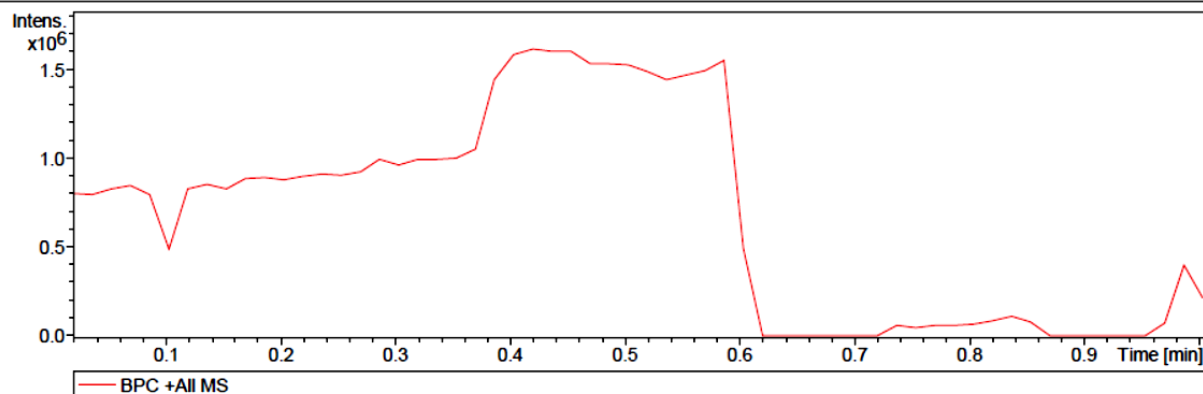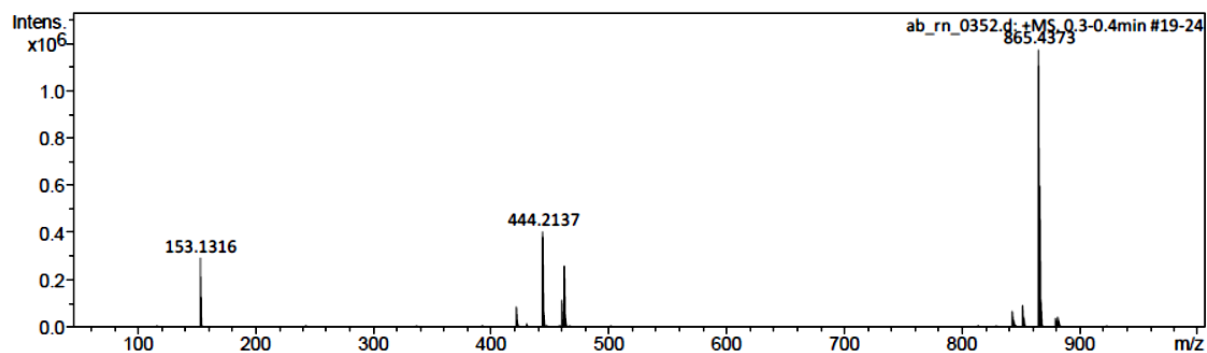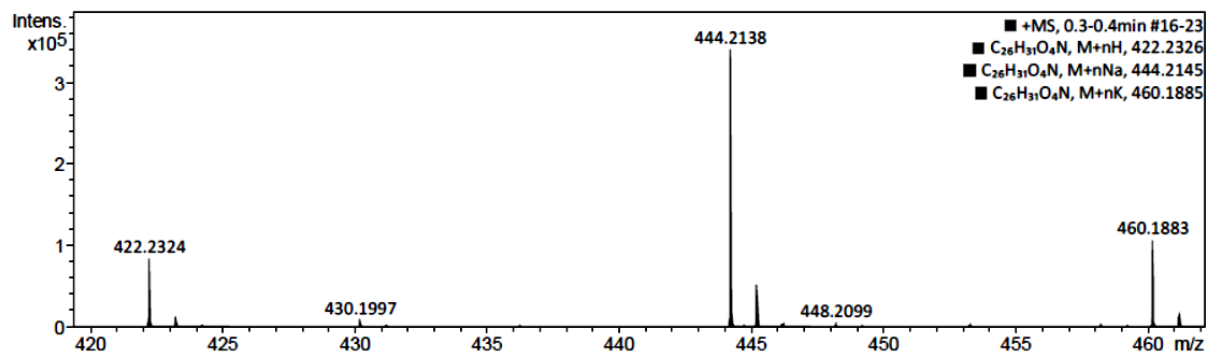

ab\_m\_0352.d

Bruker Compass DataAnalysis 4.1

printed: 1/31/2022 2:28:25 PM

by: IISER Kolkata

Page 1 of 1

HRMS data of (+)-6

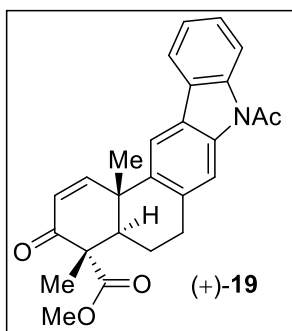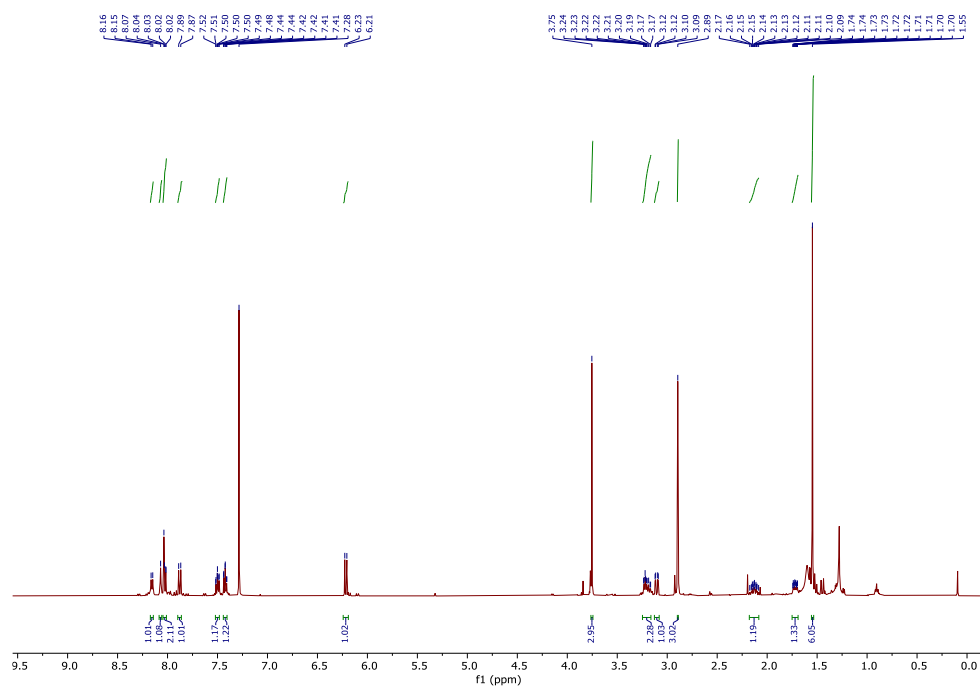

$^1\text{H}$  NMR (500 MHz,  $\text{CDCl}_3$ ) of (+)-19

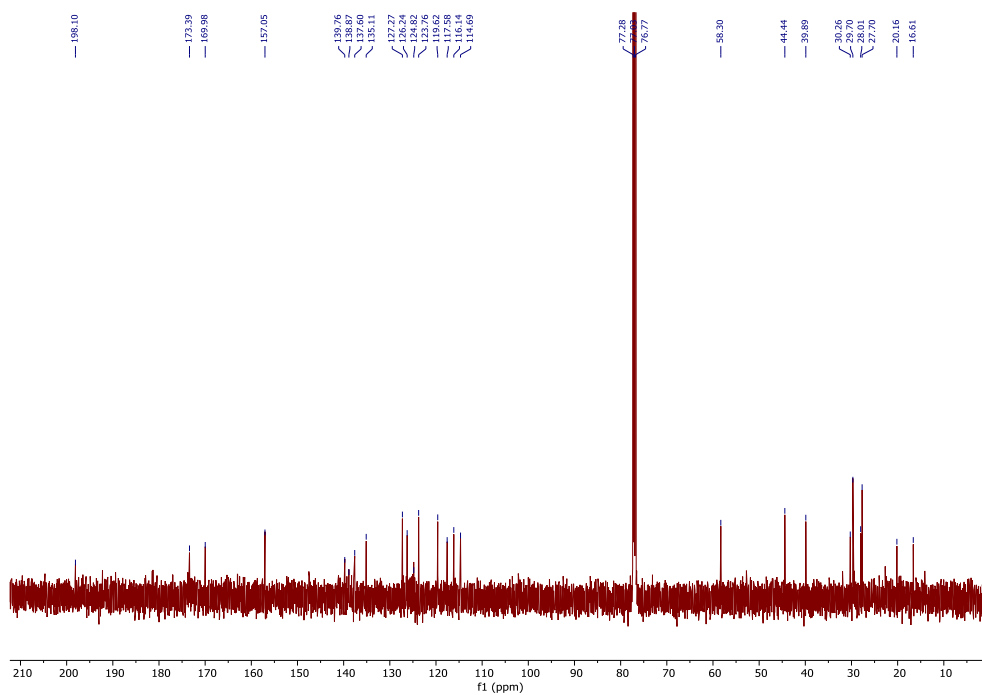

$^{13}\text{C}$  NMR (125 MHz,  $\text{CDCl}_3$ ) of (+)-19

## Display Report

**Analysis Info**

Analysis Name D:\Data\User data\2022\FEB\AB\_RN\_0360.d  
 Method Tune\_pos\_Standard.m  
 Sample Name AB\_RN\_0360  
 Comment hydrolyzed to aldehyde using quantitative TFA

Acquisition Date 2/2/2022 1:14:20 PM

Operator IISER Kolkata

Instrument maXis impact 8282001.00127

**Acquisition Parameter**

|             |          |                      |          |                  |           |
|-------------|----------|----------------------|----------|------------------|-----------|
| Source Type | ESI      | Ion Polarity         | Positive | Set Nebulizer    | 0.5 Bar   |
| Focus       | Active   | Set Capillary        | 3400 V   | Set Dry Heater   | 200 °C    |
| Scan Begin  | 50 m/z   | Set End Plate Offset | -500 V   | Set Dry Gas      | 4.0 l/min |
| Scan End    | 1000 m/z | Set Charging Voltage | 2000 V   | Set Divert Valve | Source    |
|             |          | Set Corona           | 0 nA     | Set APCI Heater  | 0 °C      |

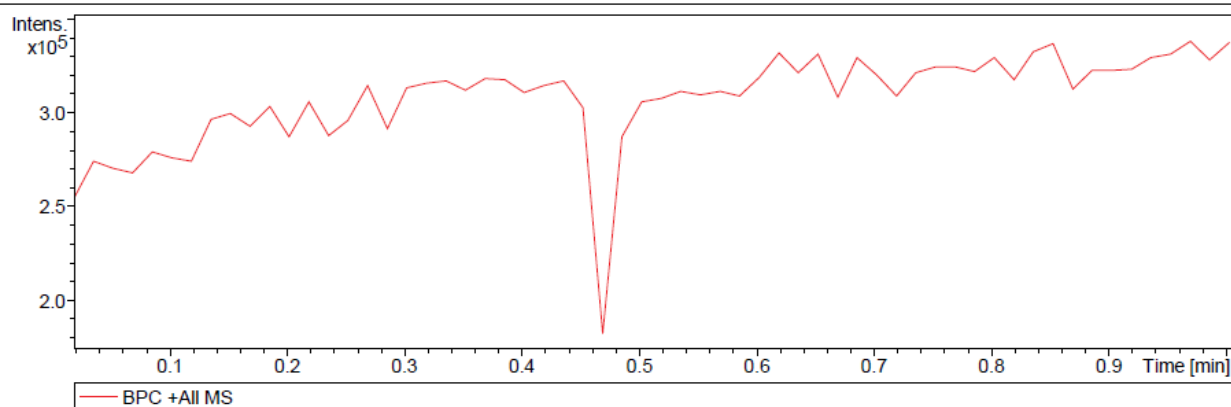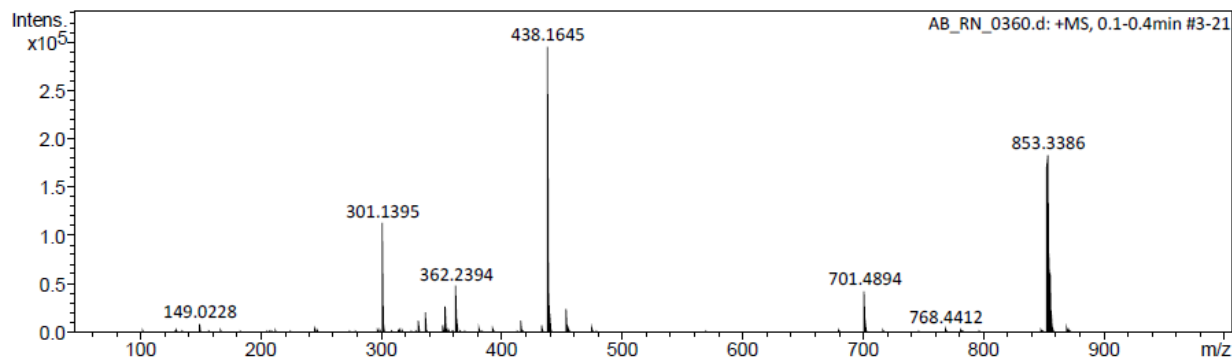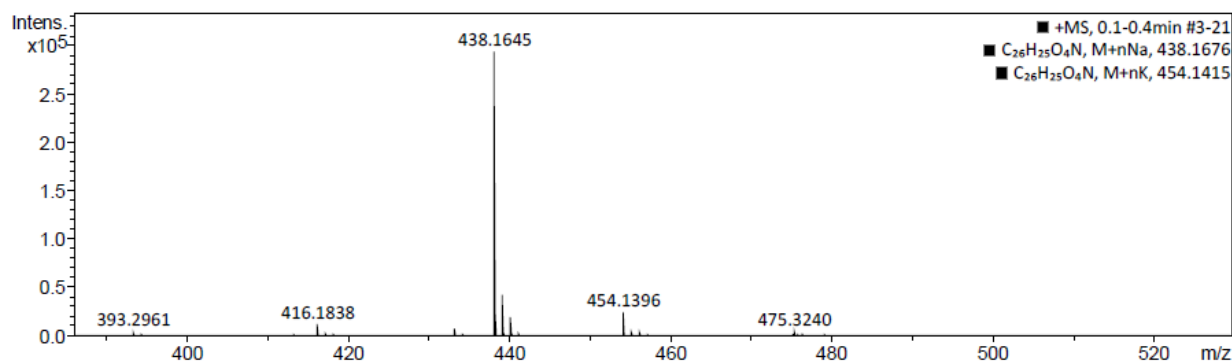

AB\_RN\_0360.d

Bruker Compass DataAnalysis 4.1

printed: 2/2/2022 1:19:03 PM

by: IISER Kolkata

Page 1 of 1

HRMS data of (+)-19

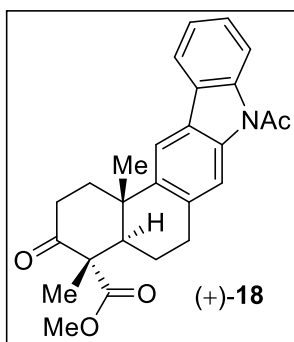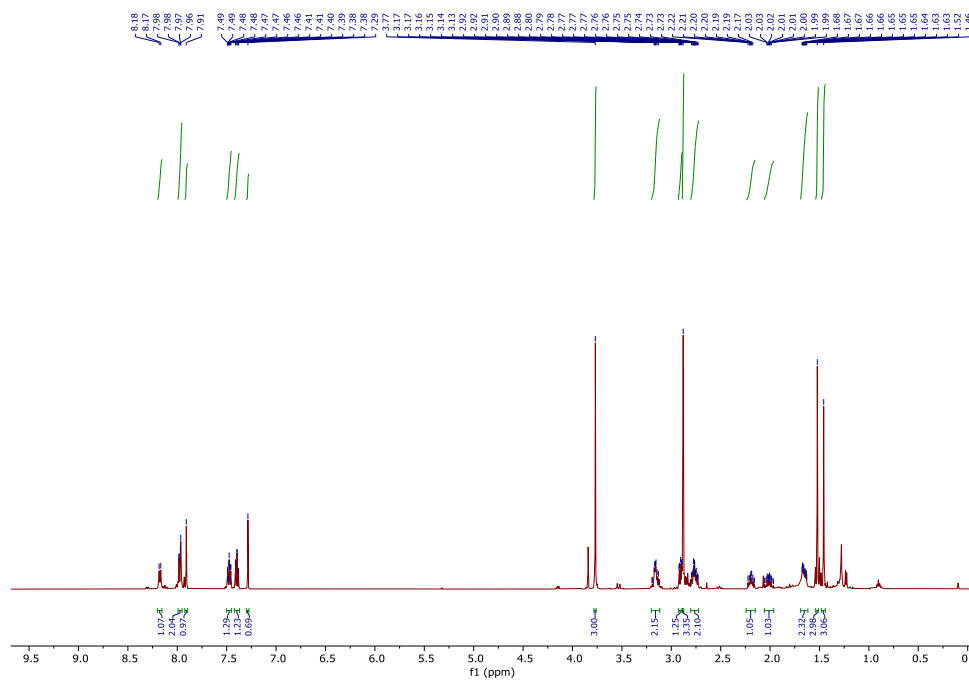 $^1\text{H}$  NMR (500 MHz,  $\text{CDCl}_3$ ) of (+)-18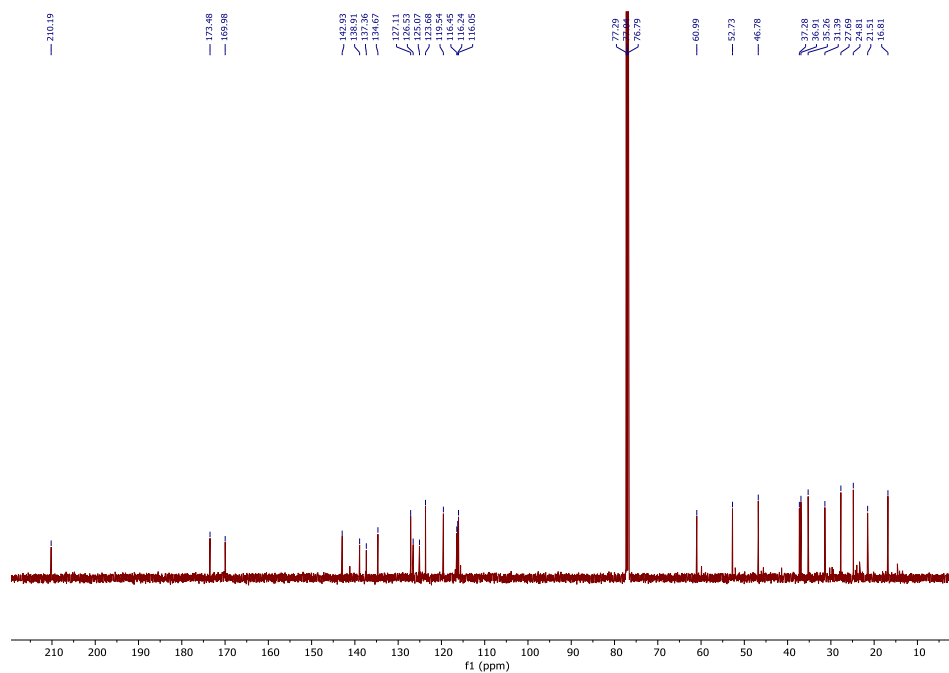 $^{13}\text{C}$  NMR (125 MHz,  $\text{CDCl}_3$ ) of (+)-18

## Display Report

## Analysis Info

Analysis Name D:\Data\User data\2022\FEB\AB\_RN\_0369.d  
Method Tune\_pos\_Standard.m  
Sample Name AB\_RN\_0369  
Comment

Acquisition Date 2/17/2022 6:48:52 PM

Operator IISER Kolkata  
Instrument maXis impact 8282001.00127

## Acquisition Parameter

|             |          |                      |          |                  |           |
|-------------|----------|----------------------|----------|------------------|-----------|
| Source Type | ESI      | Ion Polarity         | Positive | Set Nebulizer    | 0.5 Bar   |
| Focus       | Active   | Set Capillary        | 3400 V   | Set Dry Heater   | 200 °C    |
| Scan Begin  | 50 m/z   | Set End Plate Offset | -500 V   | Set Dry Gas      | 4.0 l/min |
| Scan End    | 1000 m/z | Set Charging Voltage | 2000 V   | Set Divert Valve | Source    |
|             |          | Set Corona           | 0 nA     | Set APCI Heater  | 0 °C      |

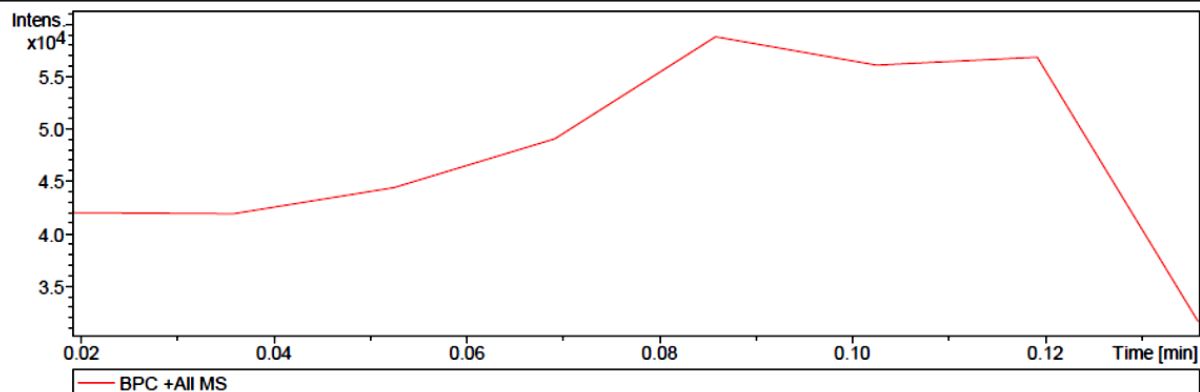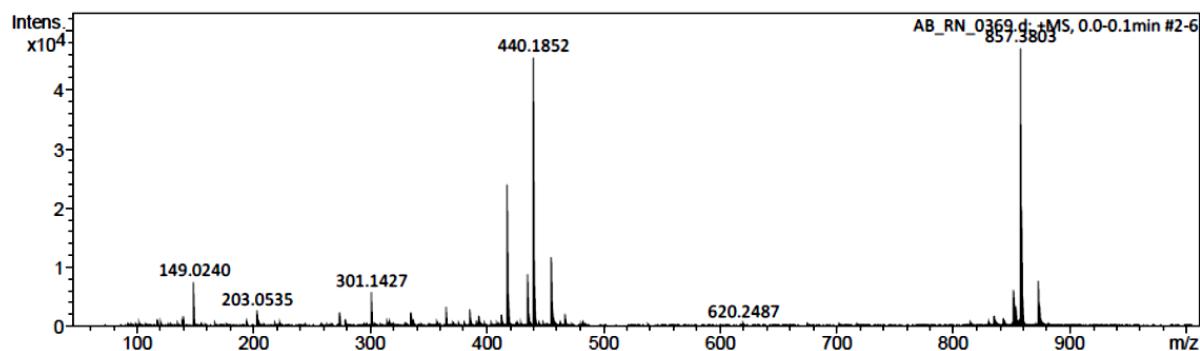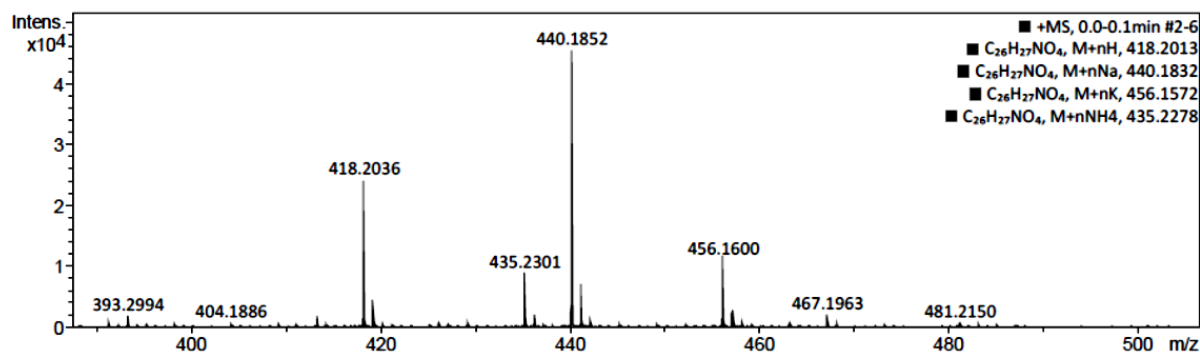

AB\_RN\_0369.d

Bruker Compass DataAnalysis 4.1

printed: 2/17/2022 6:56:31 PM

by: IISER Kolkata

Page 1 of 1

HRMS data of (+)-18

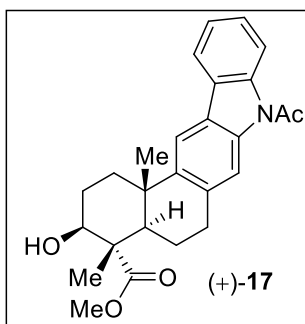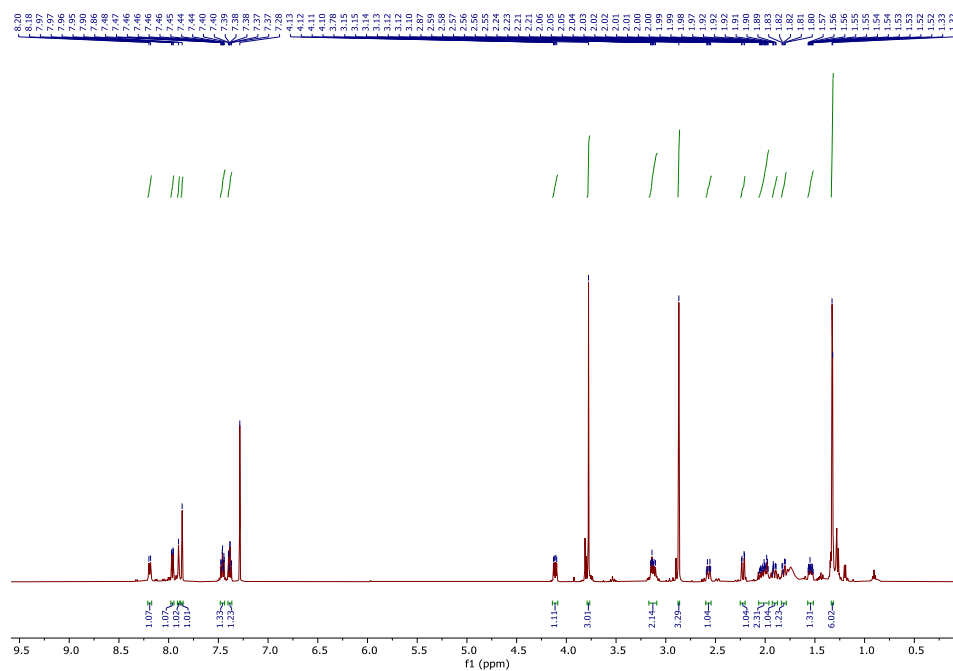 $^1\text{H}$  NMR (500 MHz,  $\text{CDCl}_3$ ) of (+)-17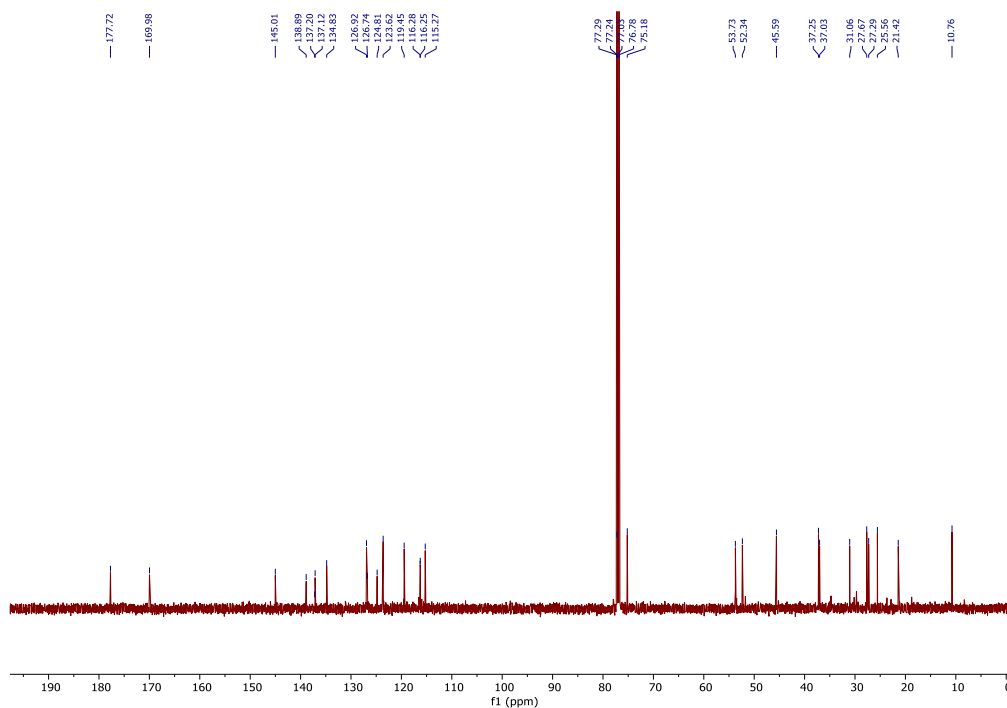 $^{13}\text{C}$  NMR (125 MHz,  $\text{CDCl}_3$ ) of (+)-17

## Display Report

## Analysis Info

Analysis Name D:\Data\User data\2022\FEB\lab\_m\_0355NP2R.d

Method Tune\_pos\_Mid.m

Sample Name ab\_m\_0355NP2R

Comment

Acquisition Date 2/3/2022 1:40:59 PM

Operator IISER Kolkata

Instrument maXis impact 8282001.00127

## Acquisition Parameter

|             |          |                      |          |                  |           |
|-------------|----------|----------------------|----------|------------------|-----------|
| Source Type | ESI      | Ion Polarity         | Positive | Set Nebulizer    | 0.4 Bar   |
| Focus       | Active   | Set Capillary        | 3400 V   | Set Dry Heater   | 200 °C    |
| Scan Begin  | 50 m/z   | Set End Plate Offset | -500 V   | Set Dry Gas      | 4.0 l/min |
| Scan End    | 3000 m/z | Set Charging Voltage | 2000 V   | Set Divert Valve | Source    |
|             |          | Set Corona           | 0 nA     | Set APCI Heater  | 0 °C      |

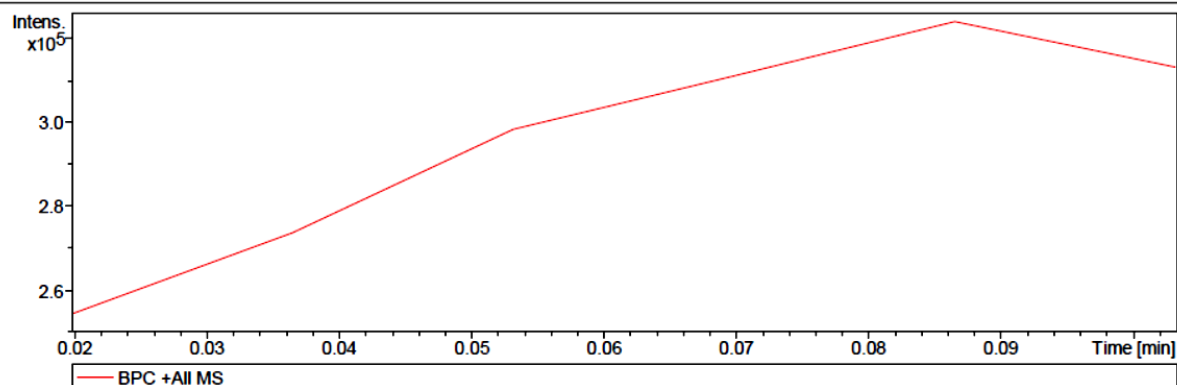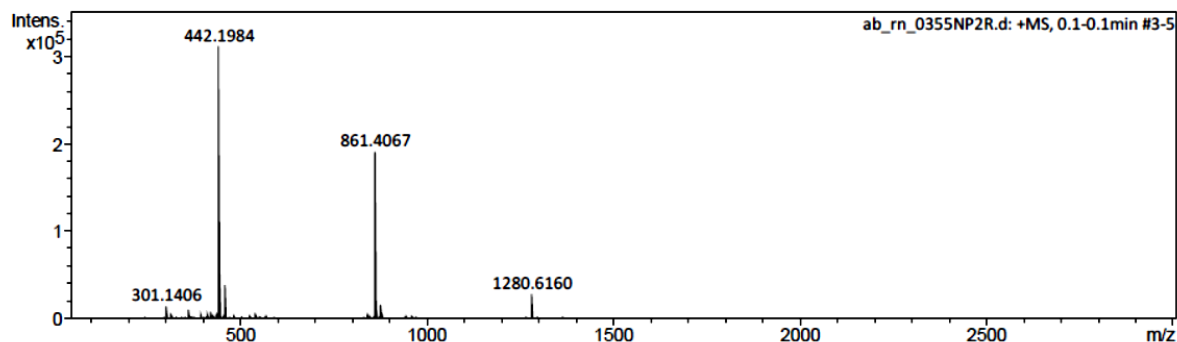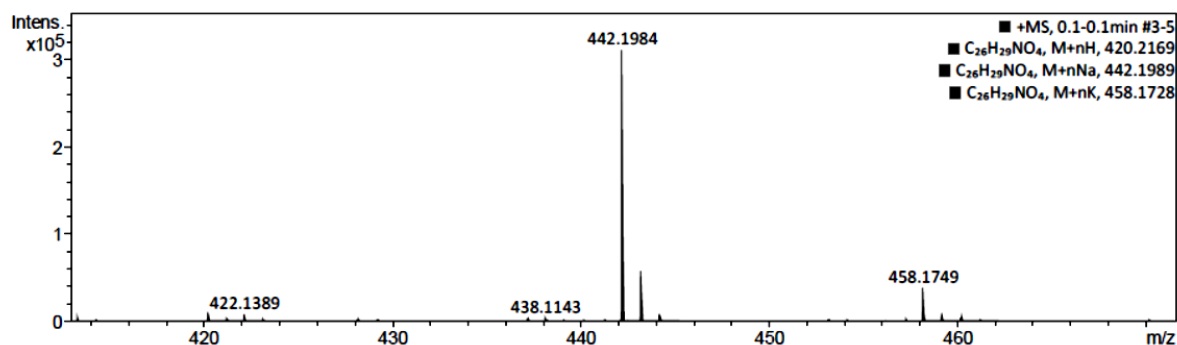

ab\_m\_0355NP2R.d

Bruker Compass DataAnalysis 4.1

printed: 2/3/2022 1:42:58 PM

by: IISER Kolkata

Page 1 of 1

HRMS data of (+)-17

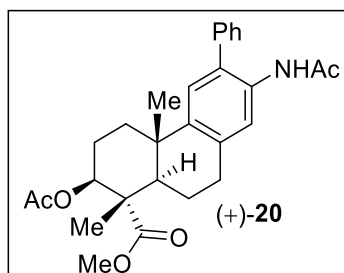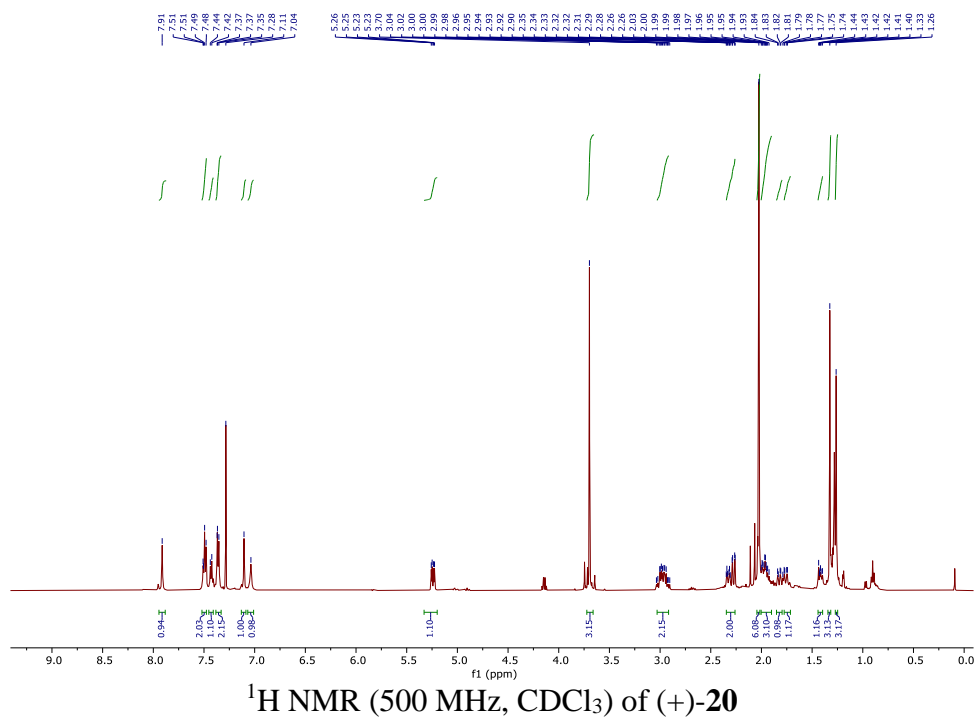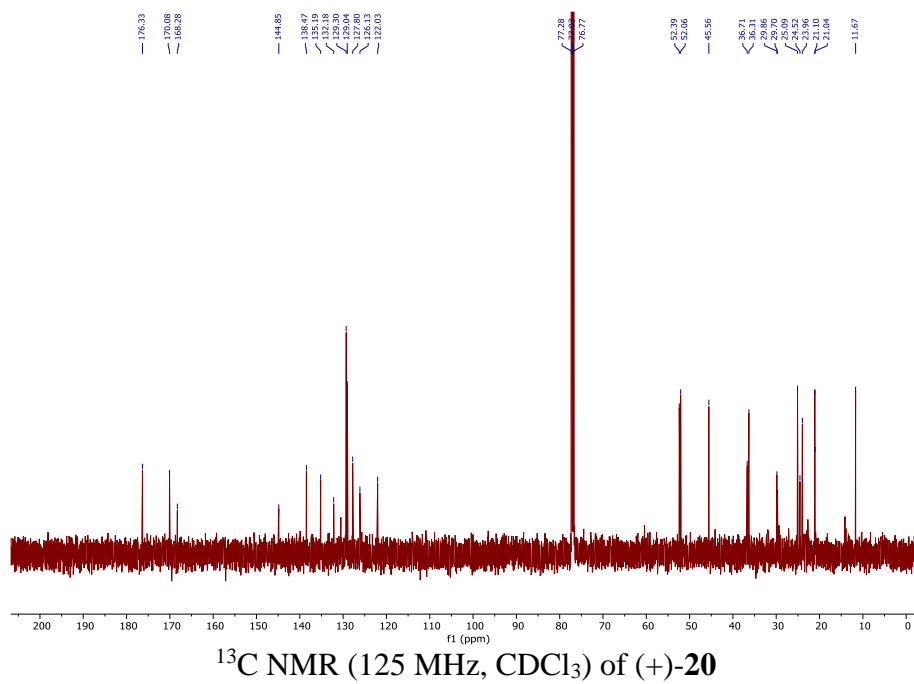



## Display Report

## Analysis Info

Analysis Name D:\Data\User data\2021\DEC\ab\_sov\_01282.d  
Method Tune\_pos\_Standard.m  
Sample Name ab\_sov\_01282  
Comment

Acquisition Date 12/15/2021 1:14:12 PM

Operator IISER Kolkata  
Instrument maXis impact 8282001.00127

## Acquisition Parameter

|             |          |                      |          |                  |           |
|-------------|----------|----------------------|----------|------------------|-----------|
| Source Type | ESI      | Ion Polarity         | Positive | Set Nebulizer    | 0.5 Bar   |
| Focus       | Active   | Set Capillary        | 3400 V   | Set Dry Heater   | 200 °C    |
| Scan Begin  | 50 m/z   | Set End Plate Offset | -500 V   | Set Dry Gas      | 4.0 l/min |
| Scan End    | 1000 m/z | Set Charging Voltage | 2000 V   | Set Divert Valve | Source    |
|             |          | Set Corona           | 0 nA     | Set APCI Heater  | 0 °C      |

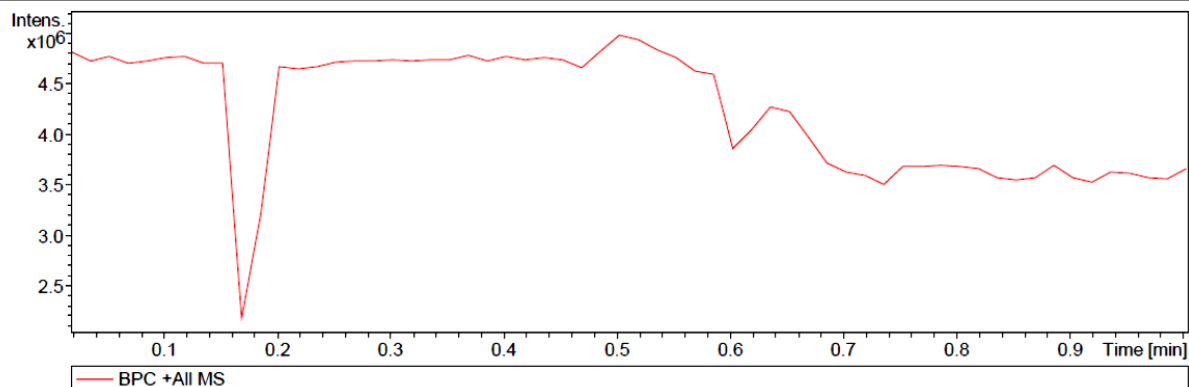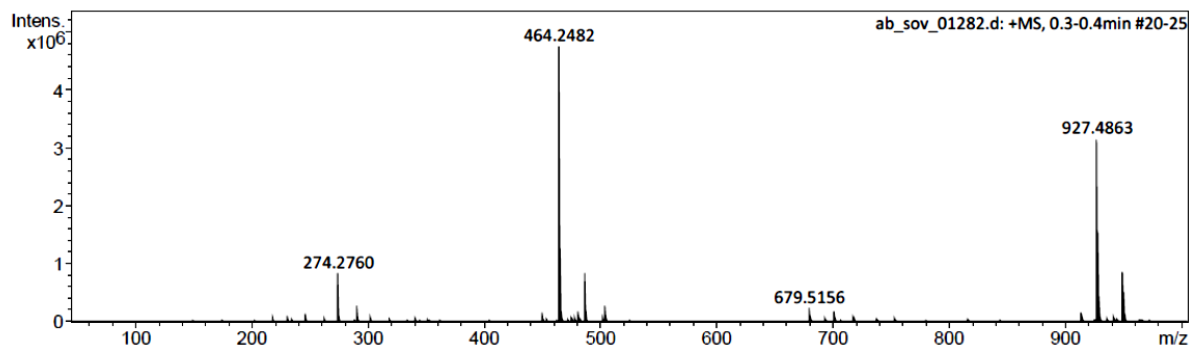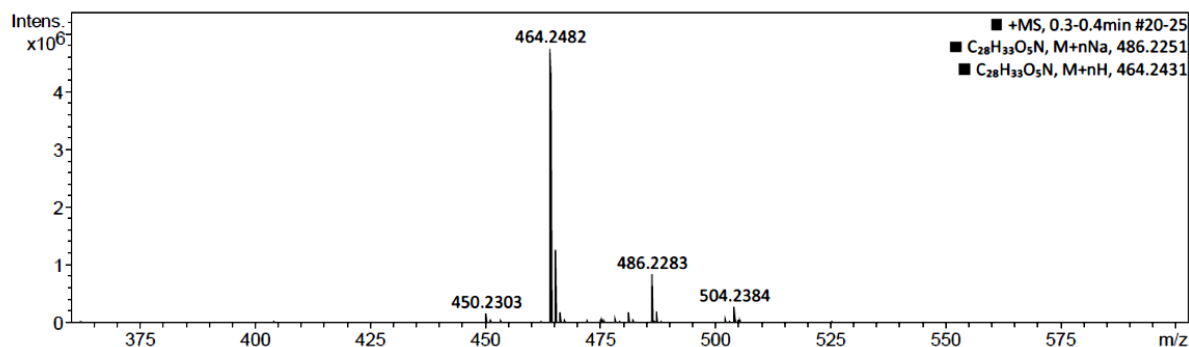

ab\_sov\_01282.d

Bruker Compass DataAnalysis 4.1

printed: 12/15/2021 1:16:39 PM

by: IISER Kolkata

Page 1 of 1

HRMS data of (+)-20

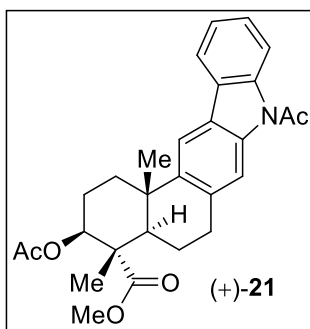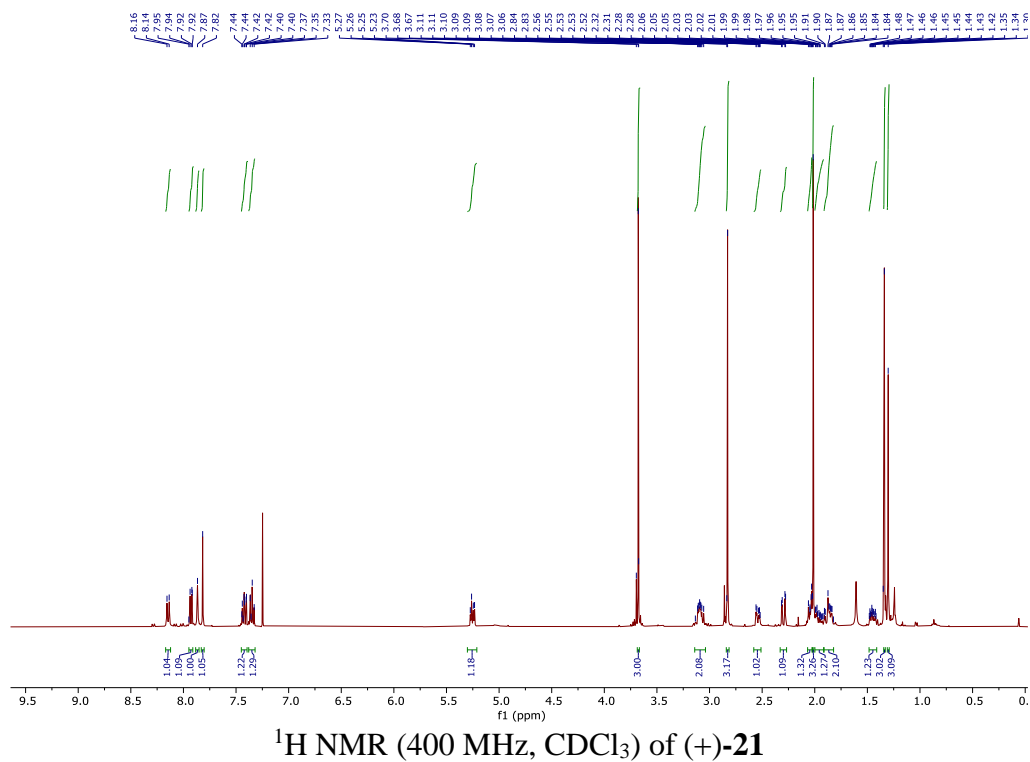<sup>1</sup>H NMR (400 MHz, CDCl<sub>3</sub>) of (+)-**21**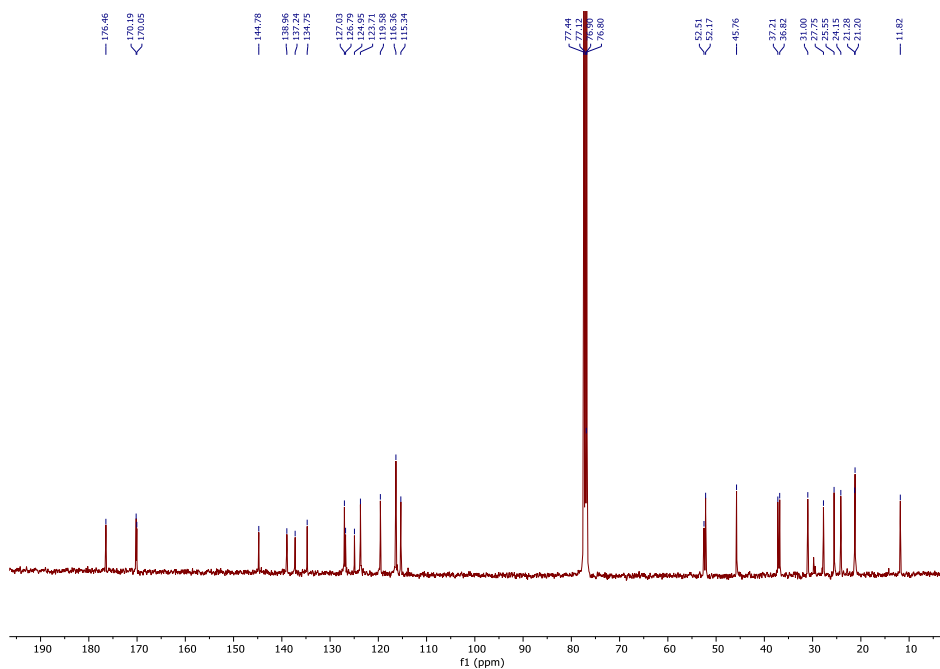 $^{13}\text{C}$  NMR (100 MHz,  $\text{CDCl}_3$ ) of (+)-**21**

## Display Report

## Analysis Info

Analysis Name D:\Data\User data\2021\AUGUST\AB\_RN\_0205.d  
Method Tune\_pos\_Standard.m  
Sample Name AB\_RN\_0205  
Comment

Acquisition Date 8/24/2021 12:39:41 PM

Operator IISER Kolkata  
Instrument maXis impact 8282001.00127

## Acquisition Parameter

|             |          |                      |          |                  |           |
|-------------|----------|----------------------|----------|------------------|-----------|
| Source Type | ESI      | Ion Polarity         | Positive | Set Nebulizer    | 0.5 Bar   |
| Focus       | Active   | Set Capillary        | 3400 V   | Set Dry Heater   | 200 °C    |
| Scan Begin  | 50 m/z   | Set End Plate Offset | -500 V   | Set Dry Gas      | 4.0 l/min |
| Scan End    | 1000 m/z | Set Charging Voltage | 2000 V   | Set Divert Valve | Source    |
|             |          | Set Corona           | 0 nA     | Set APCI Heater  | 0 °C      |

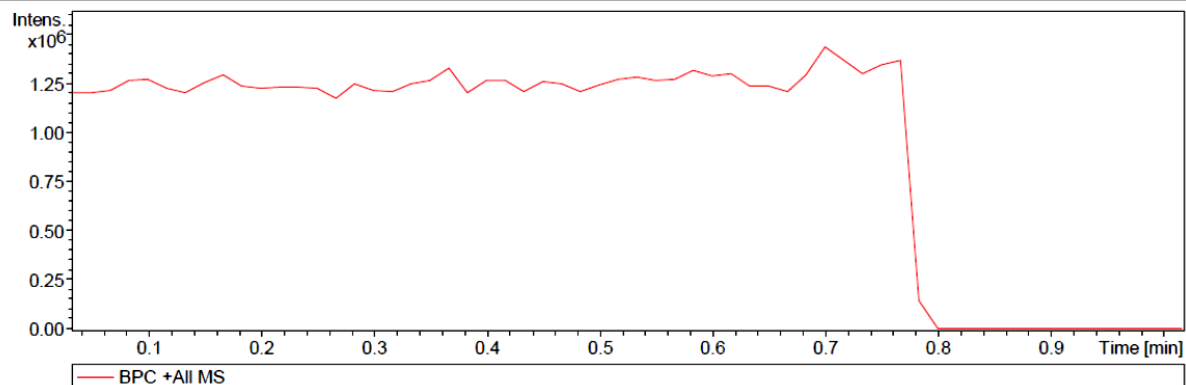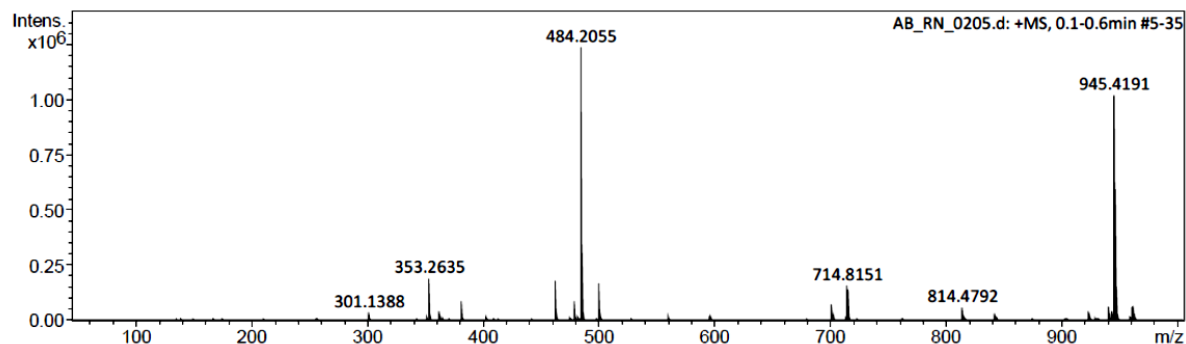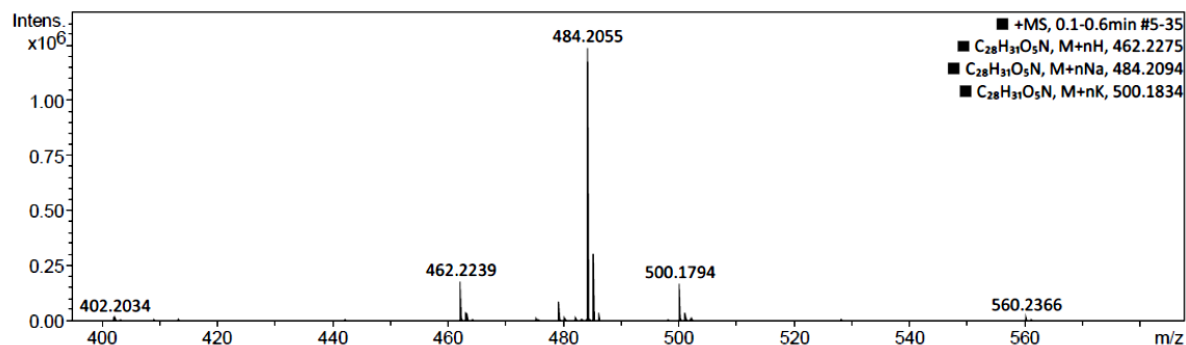

AB\_RN\_0205.d

Bruker Compass DataAnalysis 4.1

printed: 8/24/2021 12:44:18 PM

by: IISER Kolkata

Page 1 of 1

HRMS data of (+)-21

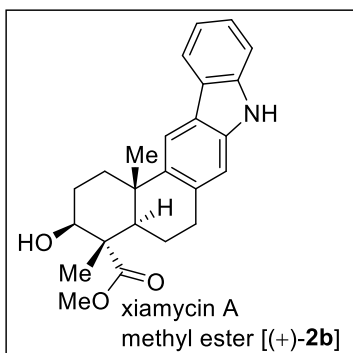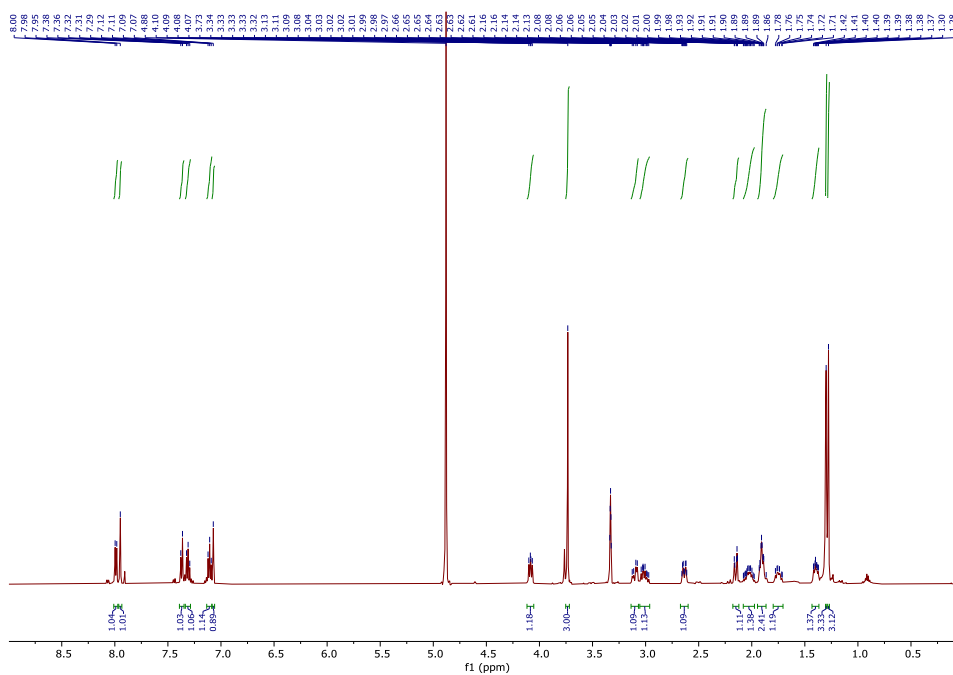<sup>1</sup>H NMR (500 MHz, CD<sub>3</sub>OD) of Xiamycin A methylester [(+)-**2b**]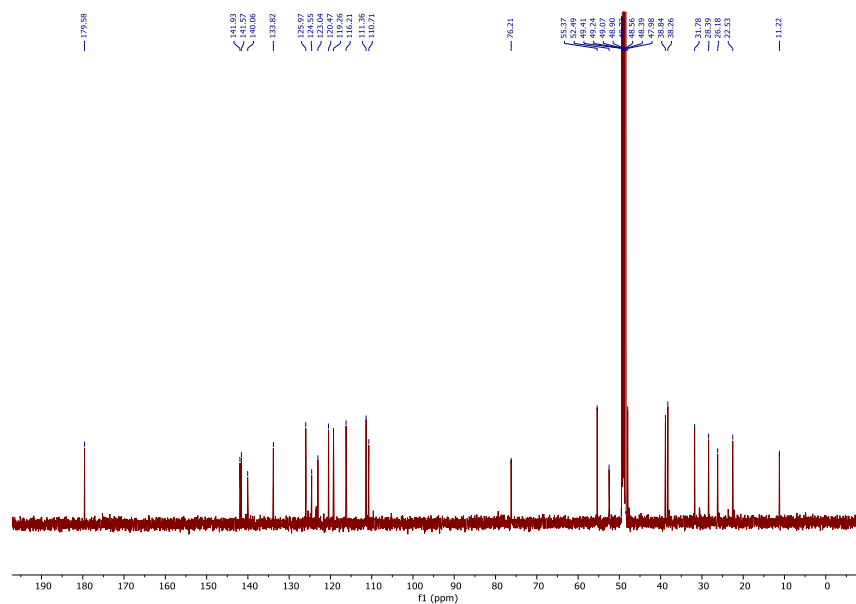

<sup>13</sup>C NMR (125 MHz, CD<sub>3</sub>OD) of Xiamycin A methylester [(+)-**2b**]

## Display Report

### Analysis Info

Analysis Name D:\Data\User data\2021\JULY\AB\_RN\_0206.d  
 Method Tune\_pos\_Standard.m  
 Sample Name RN\_0206  
 Comment

Acquisition Date 7/16/2021 5:23:48 PM

Operator IISER Kolkata  
 Instrument maXis impact 8282001.00127

### Acquisition Parameter

|             |          |                      |          |                  |           |
|-------------|----------|----------------------|----------|------------------|-----------|
| Source Type | ESI      | Ion Polarity         | Positive | Set Nebulizer    | 0.5 Bar   |
| Focus       | Active   | Set Capillary        | 3400 V   | Set Dry Heater   | 200 °C    |
| Scan Begin  | 50 m/z   | Set End Plate Offset | -500 V   | Set Dry Gas      | 4.0 l/min |
| Scan End    | 1000 m/z | Set Charging Voltage | 2000 V   | Set Divert Valve | Source    |
|             |          | Set Corona           | 0 nA     | Set APCI Heater  | 0 °C      |

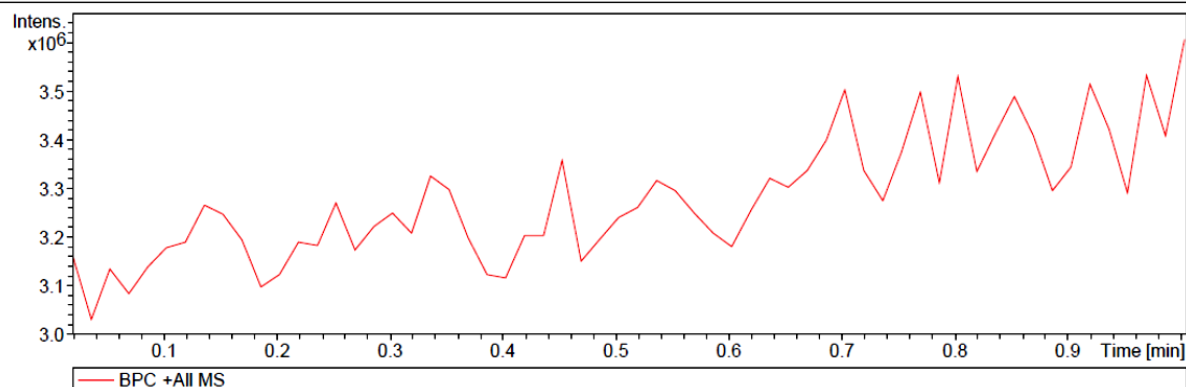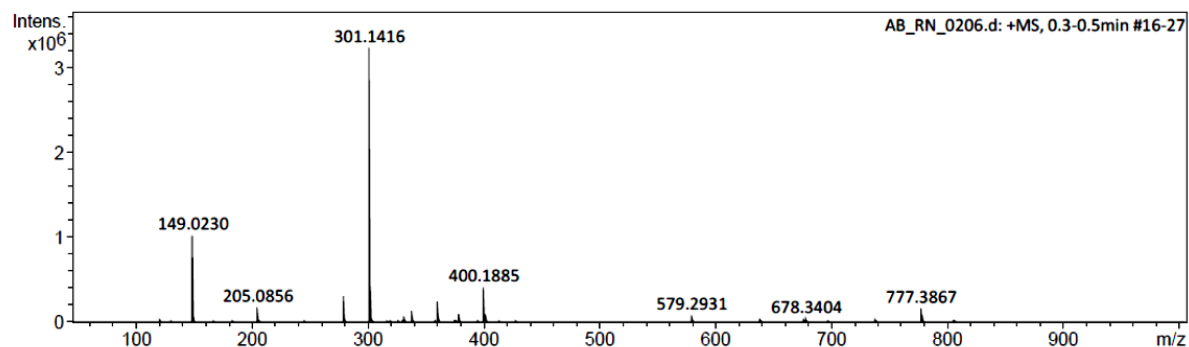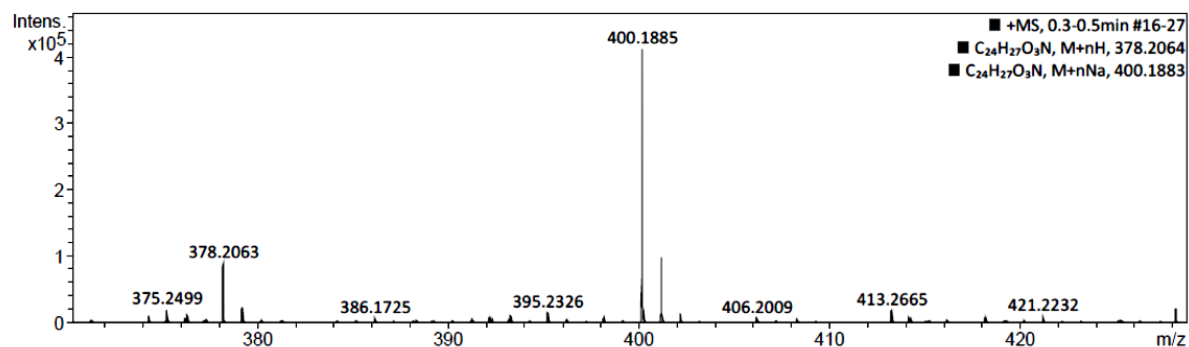

AB\_RN\_0206.d

Bruker Compass DataAnalysis 4.1

printed: 8/24/2021 4:31:10 PM

by: IISER Kolkata

Page 1 of 1

HRMS data of Xiamycin A methylester [(+)-**2b**]

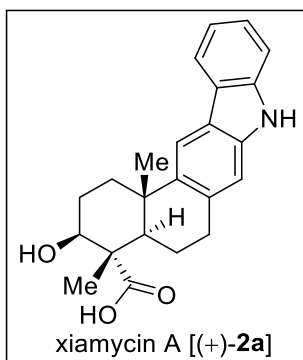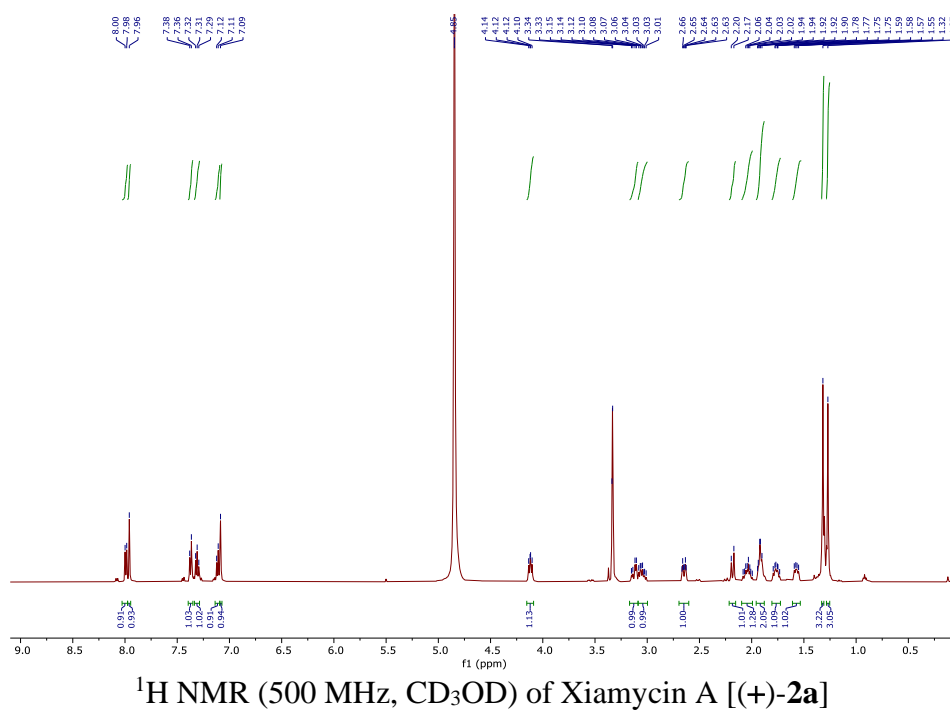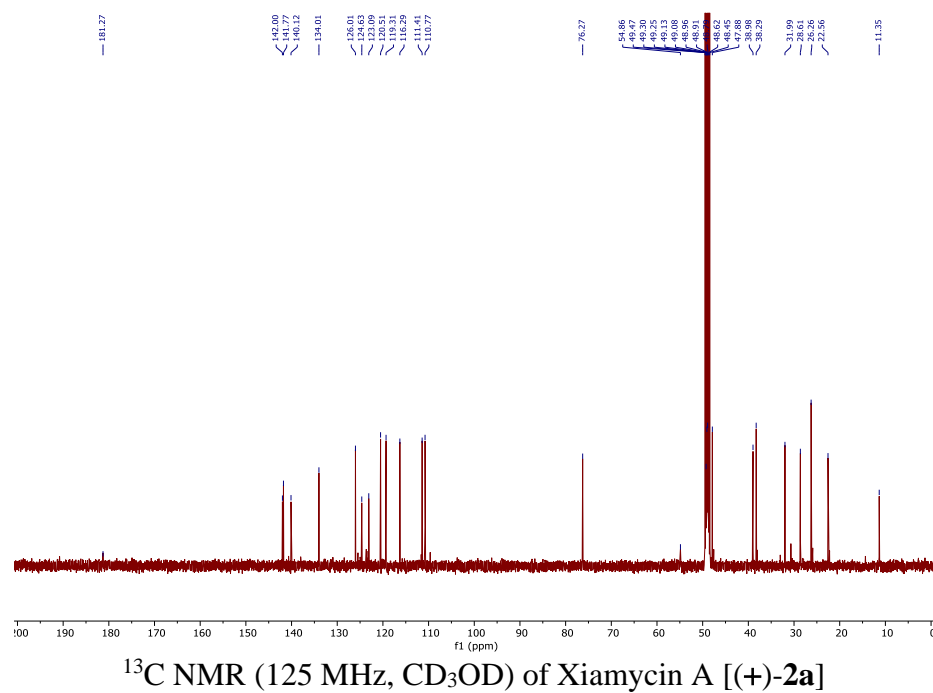

## Display Report

**Analysis Info**

Analysis Name D:\Data\User data\2021\AUGUST\AB\_RN\_236.d  
 Method Tune\_pos\_Mid.m  
 Sample Name AB\_RN\_236  
 Comment

Acquisition Date 8/21/2021 11:36:08 AM

Operator IISER Kolkata  
 Instrument maXis impact 8282001.00127

**Acquisition Parameter**

|             |          |                      |          |                  |           |
|-------------|----------|----------------------|----------|------------------|-----------|
| Source Type | ESI      | Ion Polarity         | Positive | Set Nebulizer    | 0.4 Bar   |
| Focus       | Active   | Set Capillary        | 3400 V   | Set Dry Heater   | 200 °C    |
| Scan Begin  | 50 m/z   | Set End Plate Offset | -500 V   | Set Dry Gas      | 4.0 l/min |
| Scan End    | 3000 m/z | Set Charging Voltage | 2000 V   | Set Divert Valve | Source    |
|             |          | Set Corona           | 0 nA     | Set APCI Heater  | 0 °C      |

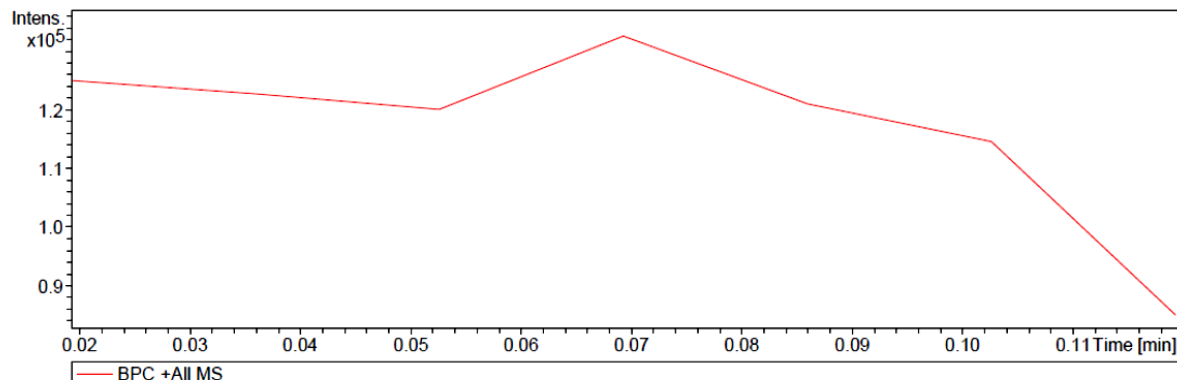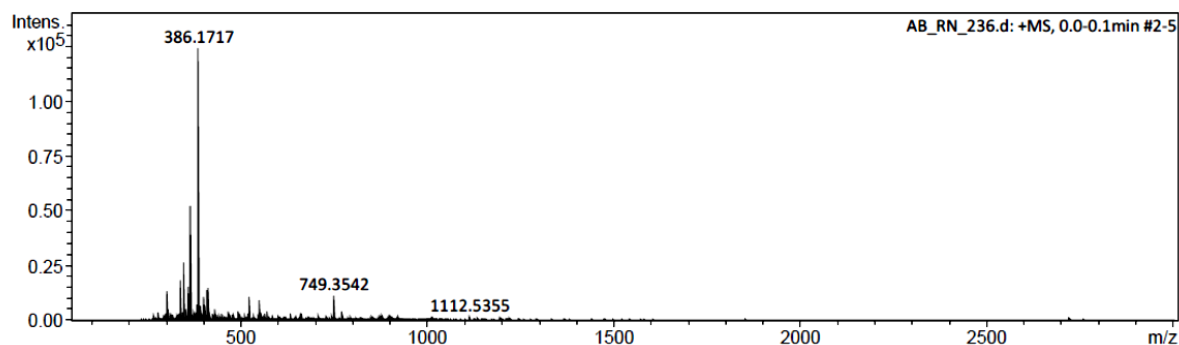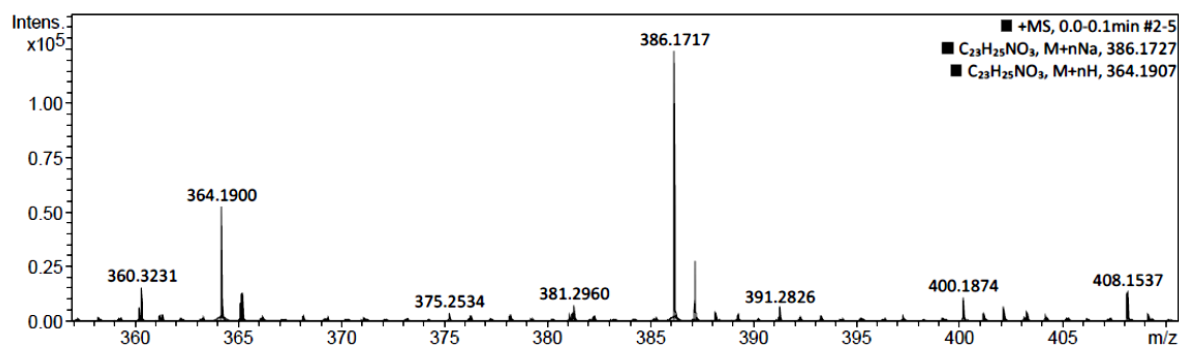

AB\_RN\_236.d

Bruker Compass DataAnalysis 4.1

printed: 8/21/2021 4:55:12 PM

by: IISER Kolkata

Page 1 of 1

HRMS data of Xiamycin A [(+)-2a]

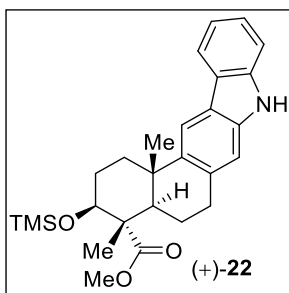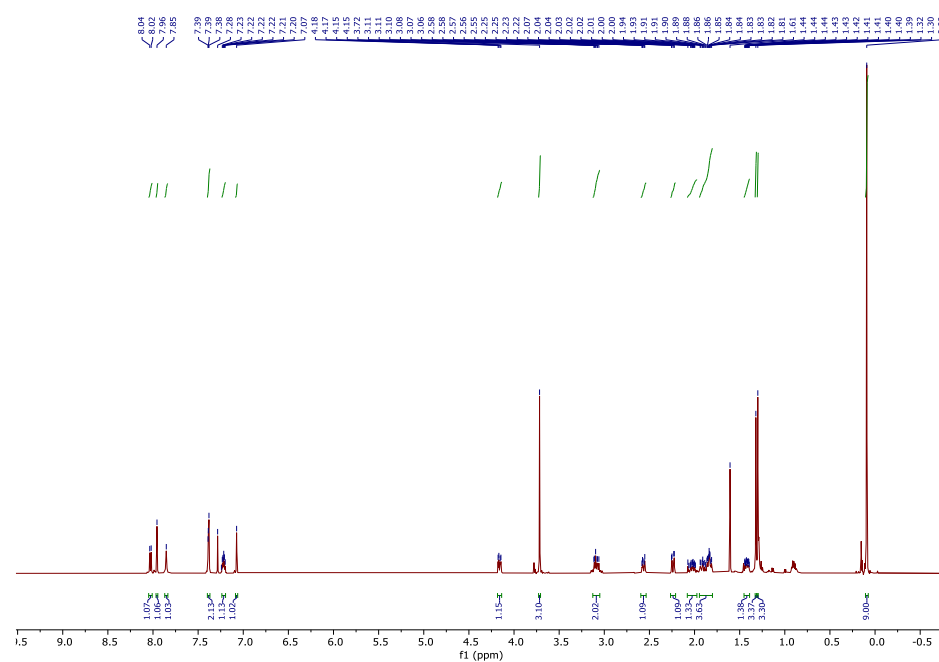

<sup>1</sup>H NMR (500 MHz, CDCl<sub>3</sub>) xiamycin A methyl ester TMS ether [(+)-22]

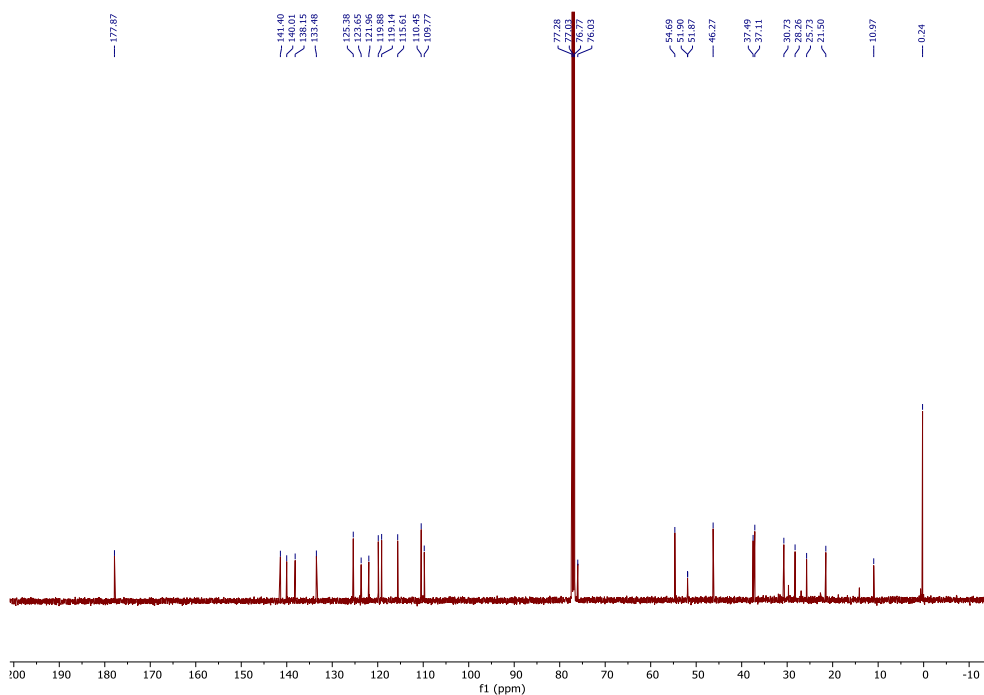

<sup>13</sup>C NMR (125 MHz, CDCl<sub>3</sub>) xiamycin A methyl ester TMS ether [(+)-22]



## Display Report

## Analysis Info

Analysis Name D:\Data\User data\2021\SEPT\AB\_RN\_247.d  
Method Tune\_pos\_Standard.m  
Sample Name AB\_RN\_247  
Comment A PEAK AT 273 CONSTANTLY COMING FROM YESTERDAY CAME FROM SAMPLE DM\_SUD\_MCOO4

Acquisition Date 9/14/2021 1:02:36 PM

Operator IISER Kolkata  
Instrument maXis impact 8282001.00127

## Acquisition Parameter

|             |          |                      |          |                  |           |
|-------------|----------|----------------------|----------|------------------|-----------|
| Source Type | ESI      | Ion Polarity         | Positive | Set Nebulizer    | 0.5 Bar   |
| Focus       | Active   | Set Capillary        | 3400 V   | Set Dry Heater   | 200 °C    |
| Scan Begin  | 50 m/z   | Set End Plate Offset | -500 V   | Set Dry Gas      | 4.0 l/min |
| Scan End    | 1000 m/z | Set Charging Voltage | 2000 V   | Set Divert Valve | Source    |
|             |          | Set Corona           | 0 nA     | Set APCI Heater  | 0 °C      |

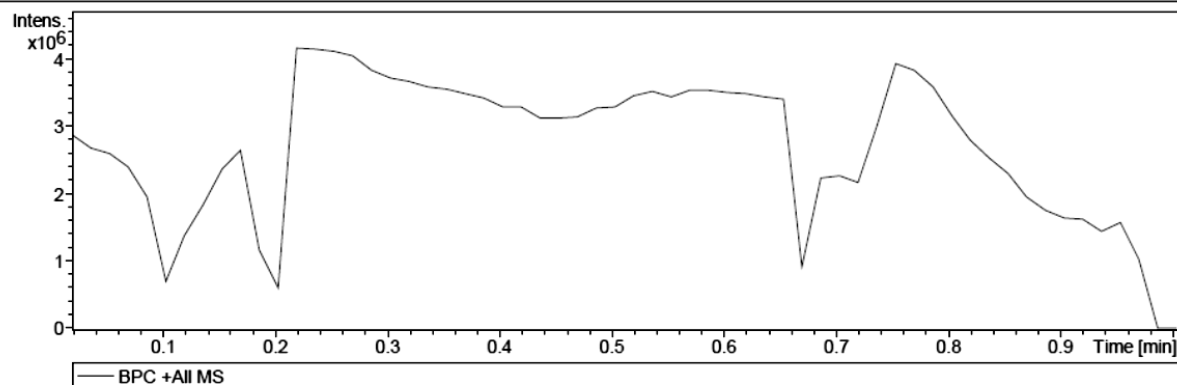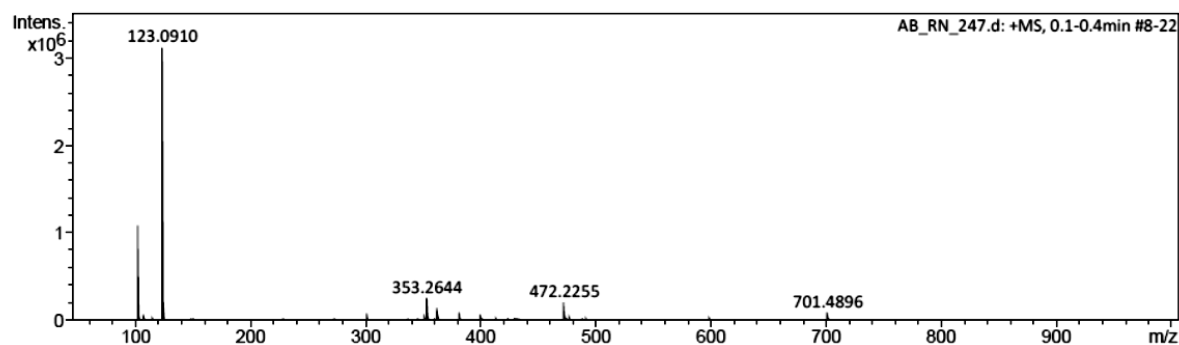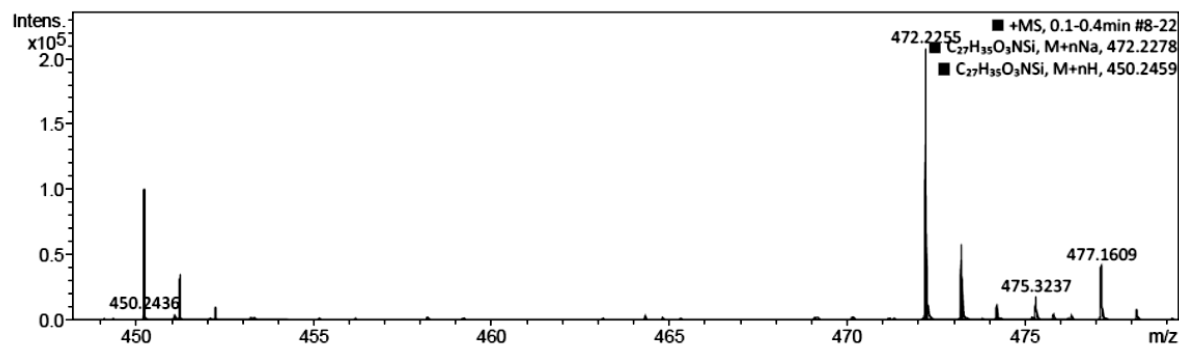

AB\_RN\_247.d

Bruker Compass DataAnalysis 4.1

printed: 9/14/2021 1:07:47 PM

by: IISER Kolkata

Page 1 of 1

HRMS data of xiamycin A methyl ester TMS ether [(+)-22]

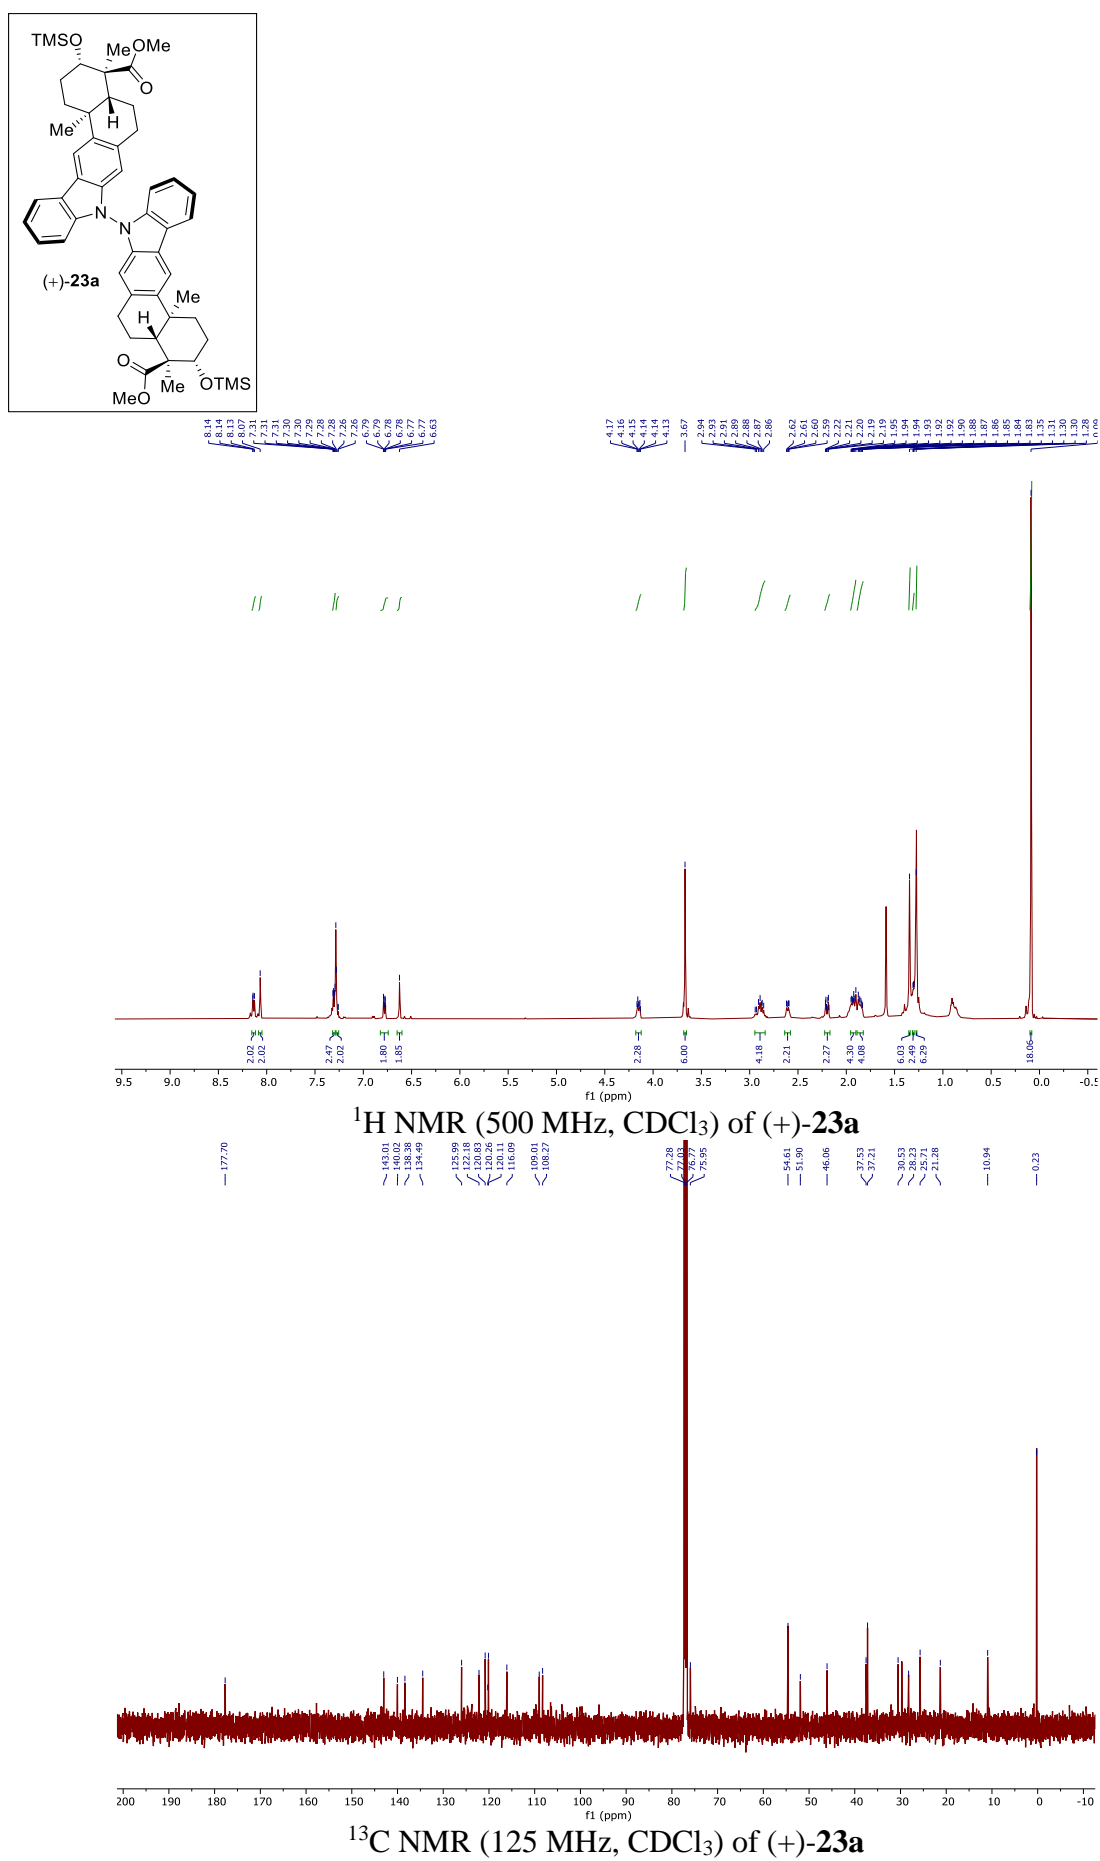

---

Display Report

---

## Analysis Info

Analysis Name D:\Data\User data\2021\SEPT\AB\_RN\_0250NP2.d  
Method Tune\_pos\_Mid.m  
Sample Name AB\_RN\_0250NP2  
Comment

Acquisition Date 9/9/2021 10:33:59 AM

Operator IISER Kolkata  
Instrument maXis impact 8282001.00127

## Acquisition Parameter

|             |          |                      |          |                  |           |
|-------------|----------|----------------------|----------|------------------|-----------|
| Source Type | ESI      | Ion Polarity         | Positive | Set Nebulizer    | 0.4 Bar   |
| Focus       | Active   | Set Capillary        | 3400 V   | Set Dry Heater   | 200 °C    |
| Scan Begin  | 50 m/z   | Set End Plate Offset | -500 V   | Set Dry Gas      | 4.0 l/min |
| Scan End    | 3000 m/z | Set Charging Voltage | 2000 V   | Set Divert Valve | Source    |
|             |          | Set Corona           | 0 nA     | Set APCI Heater  | 0 °C      |

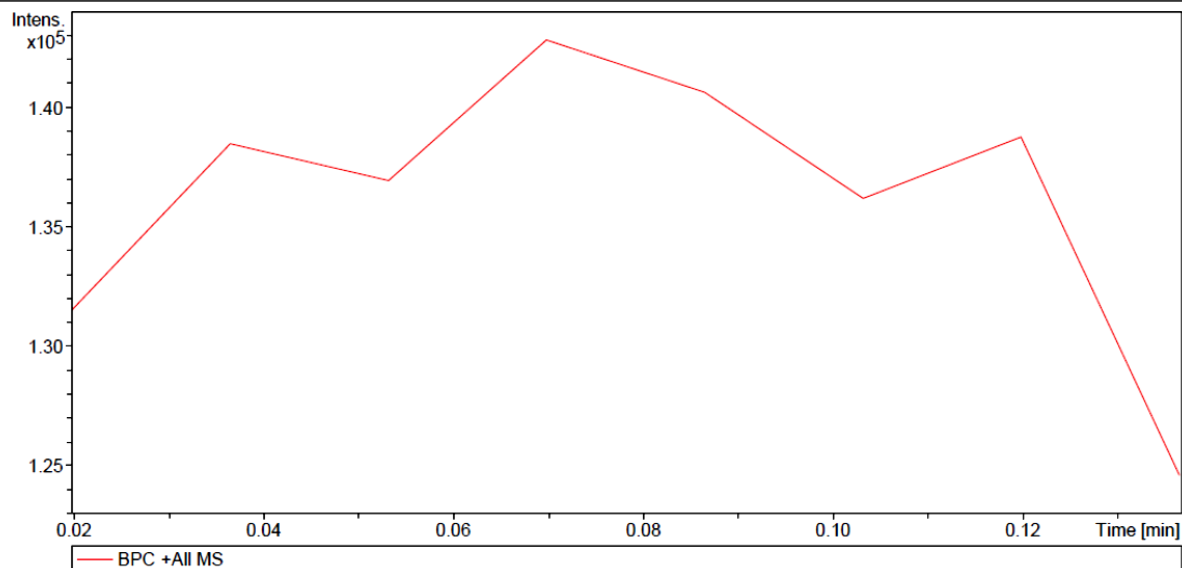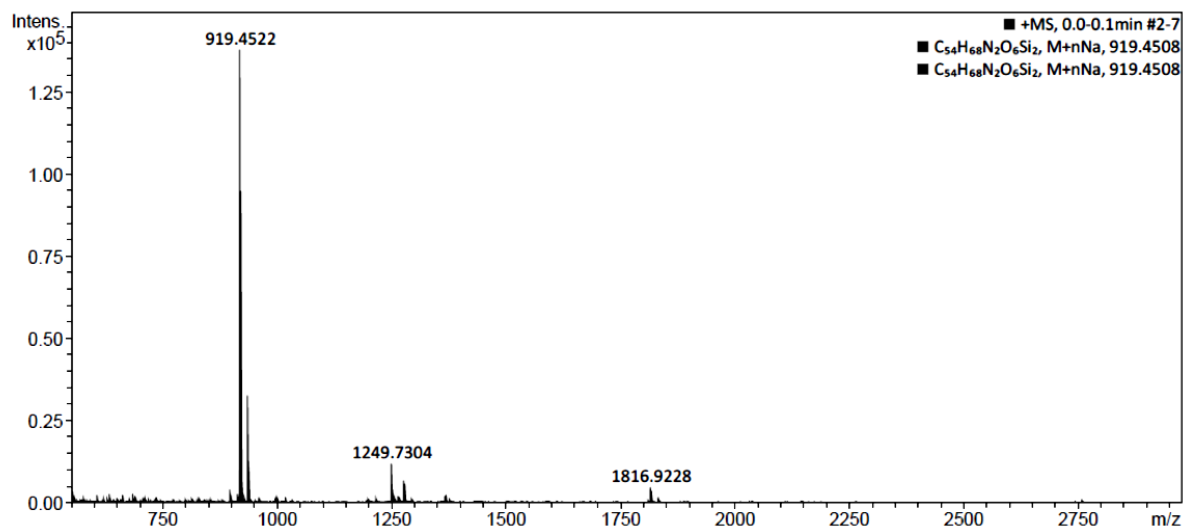

AB\_RN\_0250NP2.d

Bruker Compass DataAnalysis 4.1

printed: 9/9/2021 10:41:42 AM

by: IISER Kolkata

Page 1 of 1

HRMS data of (+)-**23a**

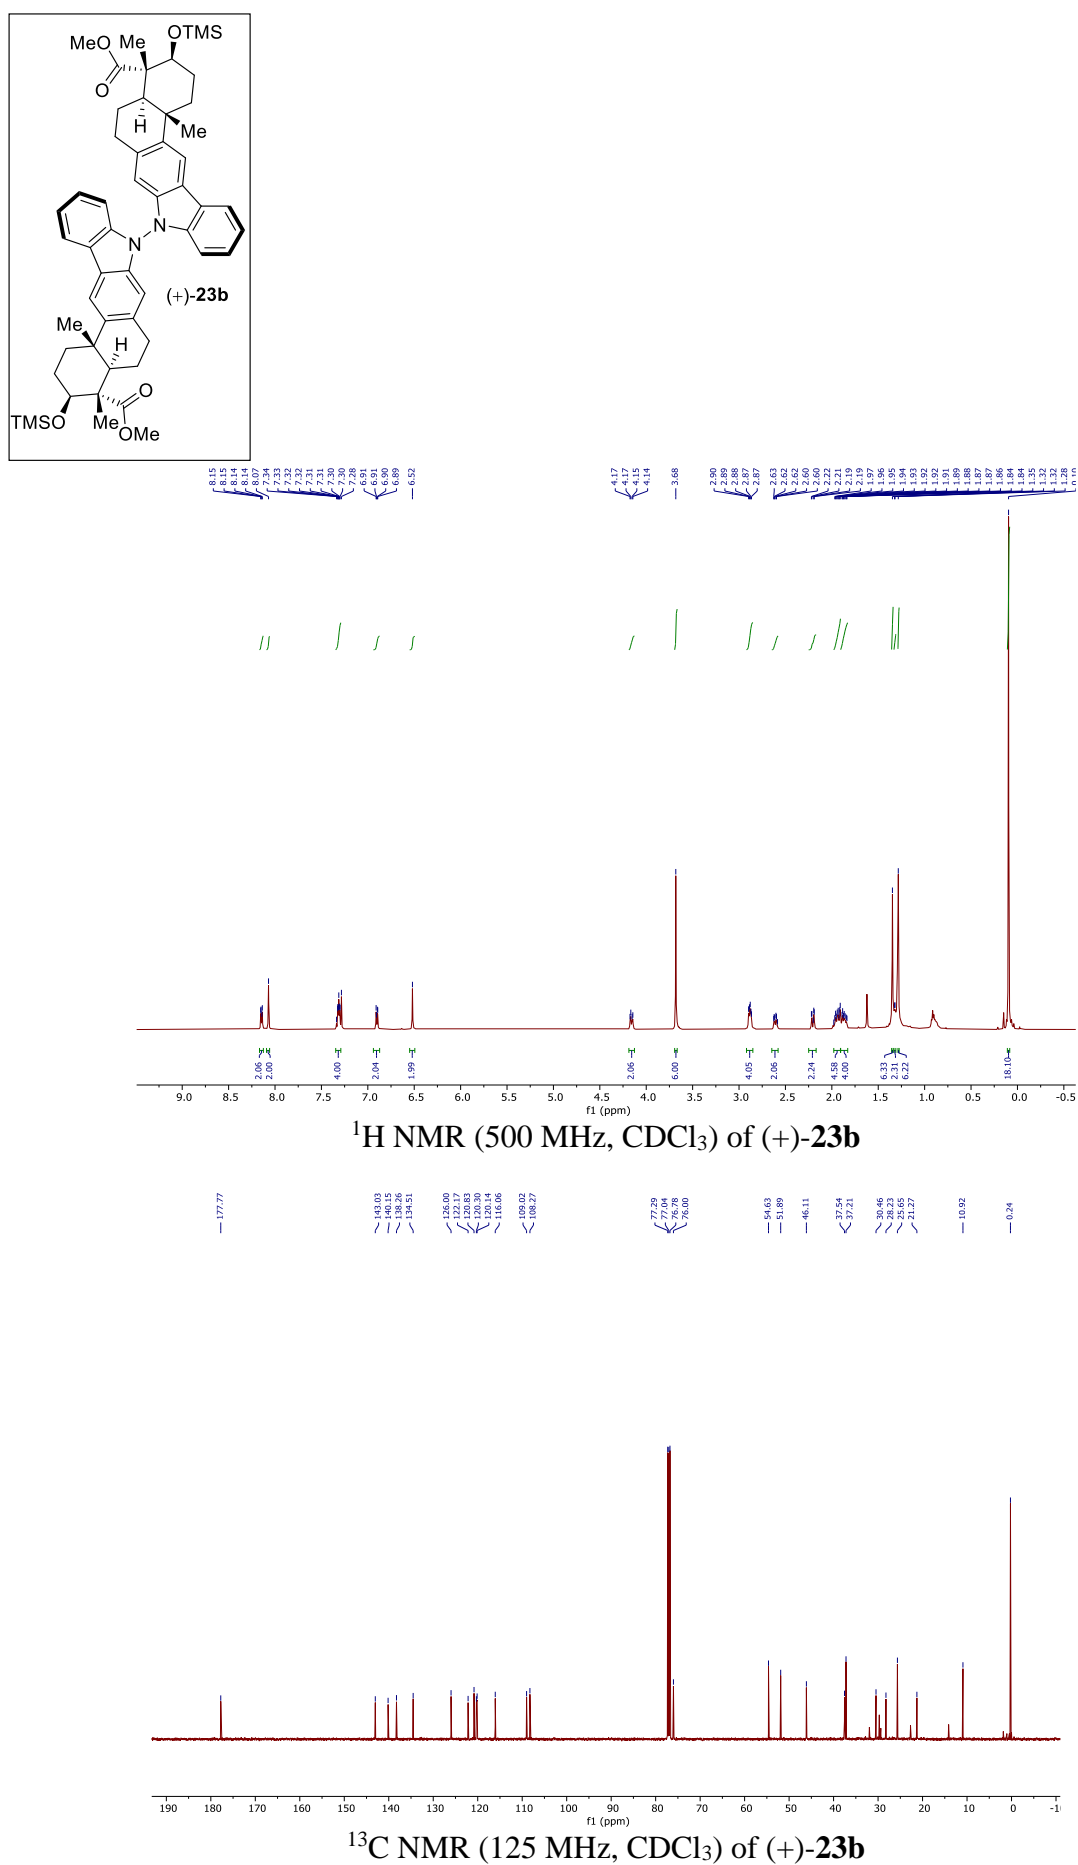

## Display Report

## Analysis Info

Analysis Name D:\Data\User data\2022\FEB\AB\_RN\_0373NP1.d

Method Tune\_pos\_Mid.m

Sample Name AB\_RN\_0373NP1

Comment signal dropping issue

Acquisition Date 2/25/2022 12:17:00 PM

Operator IISER Kolkata

Instrument maXis impact 8282001.00127

## Acquisition Parameter

|             |          |                      |          |                  |           |
|-------------|----------|----------------------|----------|------------------|-----------|
| Source Type | ESI      | Ion Polarity         | Positive | Set Nebulizer    | 0.4 Bar   |
| Focus       | Active   | Set Capillary        | 3400 V   | Set Dry Heater   | 200 °C    |
| Scan Begin  | 50 m/z   | Set End Plate Offset | -500 V   | Set Dry Gas      | 4.0 l/min |
| Scan End    | 3000 m/z | Set Charging Voltage | 2000 V   | Set Divert Valve | Source    |
|             |          | Set Corona           | 0 nA     | Set APCI Heater  | 0 °C      |

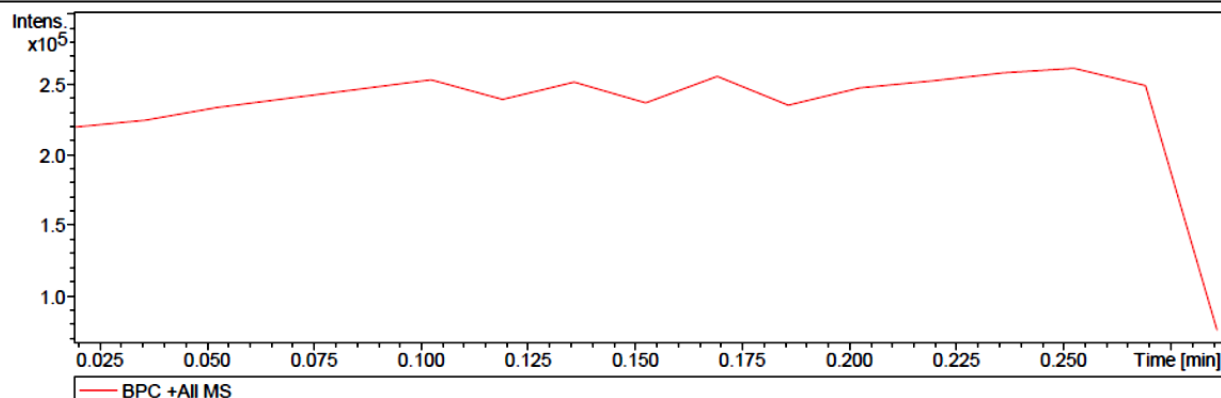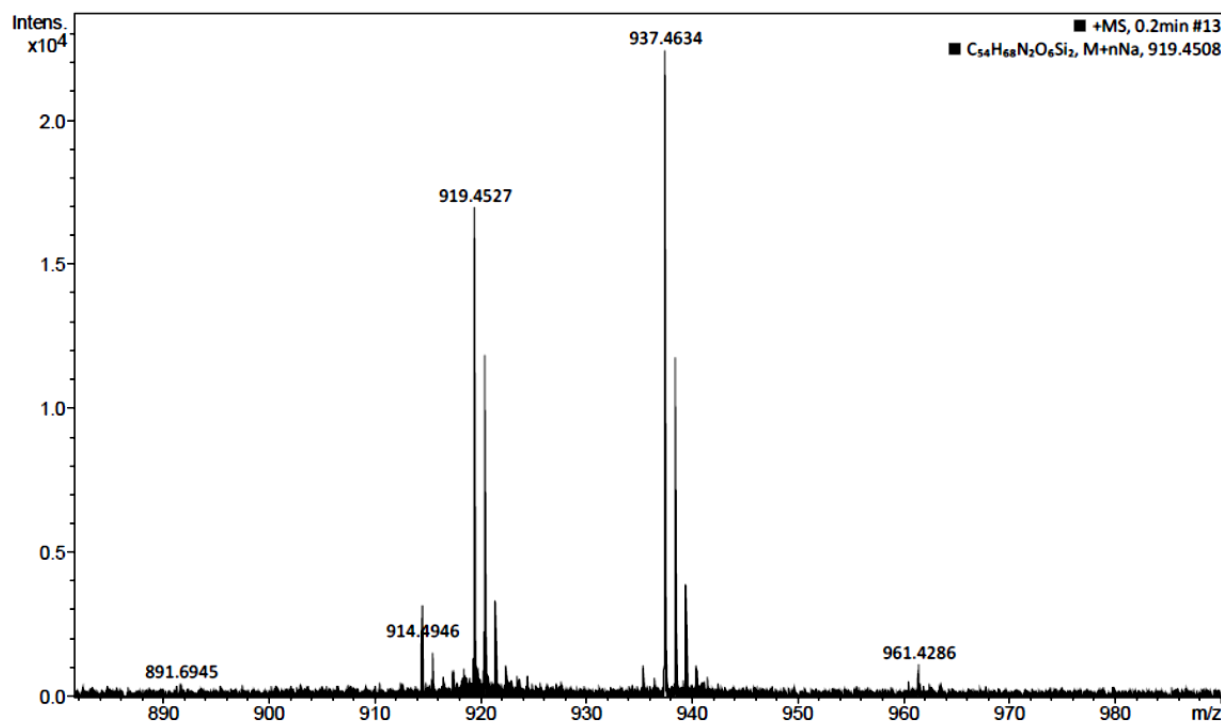

AB\_RN\_0373NP1.d

Bruker Compass DataAnalysis 4.1

printed: 2/25/2022 12:19:46 PM

by: IISER Kolkata

Page 1 of 1

HRMS data of (+)-**23b**

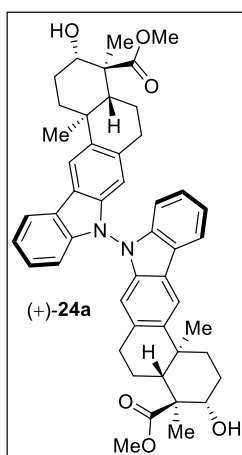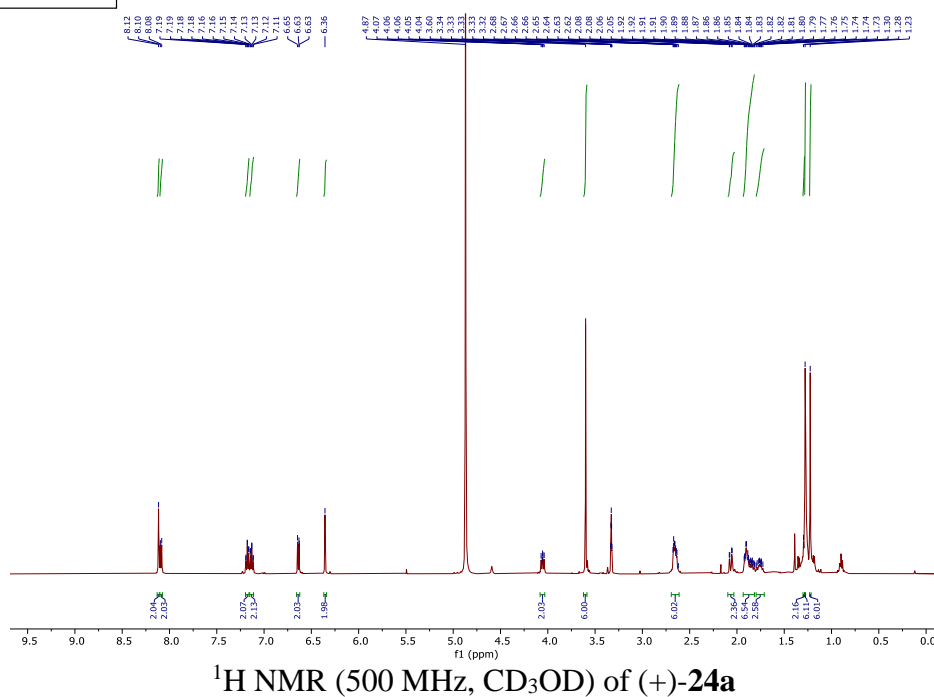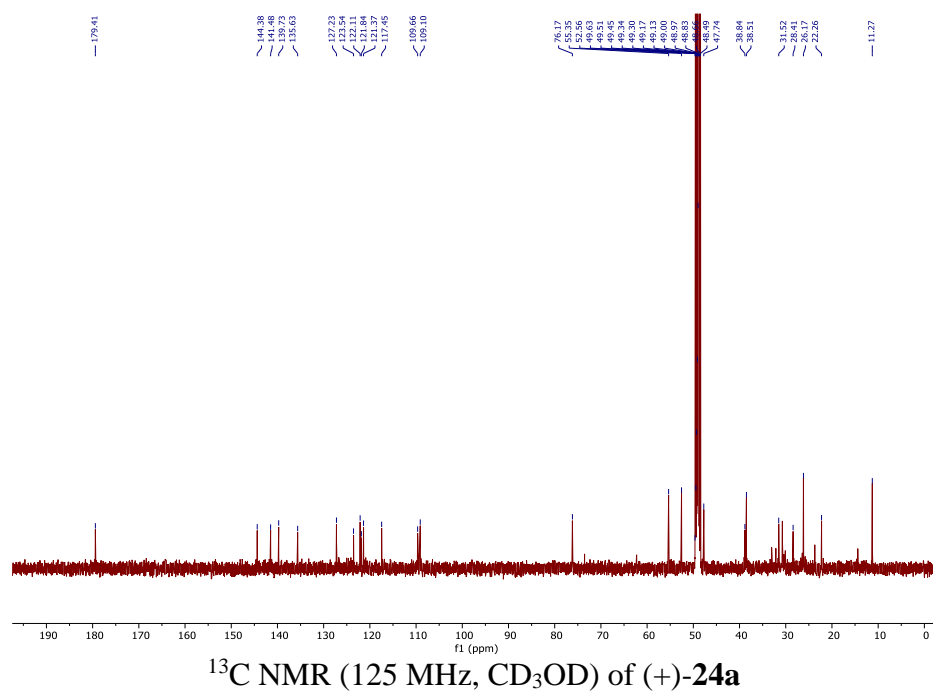

## Display Report

### Analysis Info

Analysis Name D:\Data\User data\2021\NOV\AB-m\_0292.d  
 Method Tune\_pos\_Mid.m  
 Sample Name AB-m\_0292  
 Comment

Acquisition Date 11/12/2021 1:55:58 PM

Operator IISER Kolkata  
 Instrument maXis impact 8282001.00127

### Acquisition Parameter

|             |          |                      |          |                  |           |
|-------------|----------|----------------------|----------|------------------|-----------|
| Source Type | ESI      | Ion Polarity         | Positive | Set Nebulizer    | 0.4 Bar   |
| Focus       | Active   | Set Capillary        | 3400 V   | Set Dry Heater   | 200 °C    |
| Scan Begin  | 50 m/z   | Set End Plate Offset | -500 V   | Set Dry Gas      | 4.0 l/min |
| Scan End    | 3000 m/z | Set Charging Voltage | 2000 V   | Set Divert Valve | Source    |
|             |          | Set Corona           | 0 nA     | Set APCI Heater  | 0 °C      |

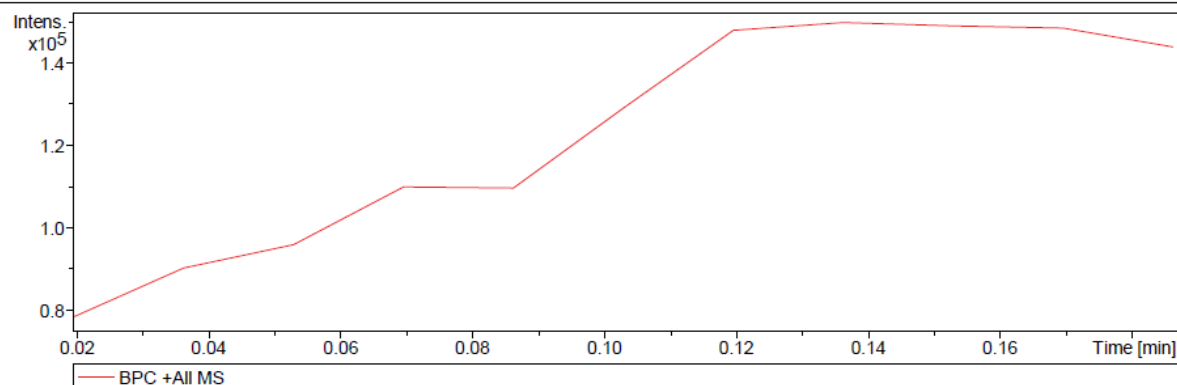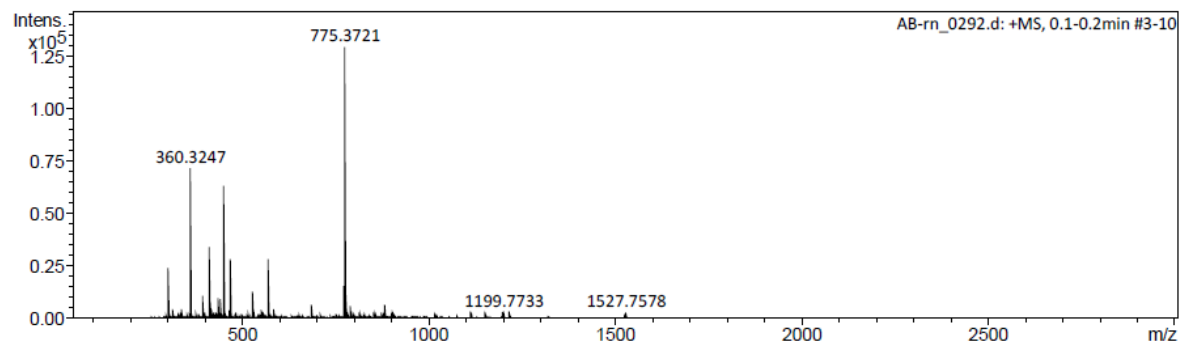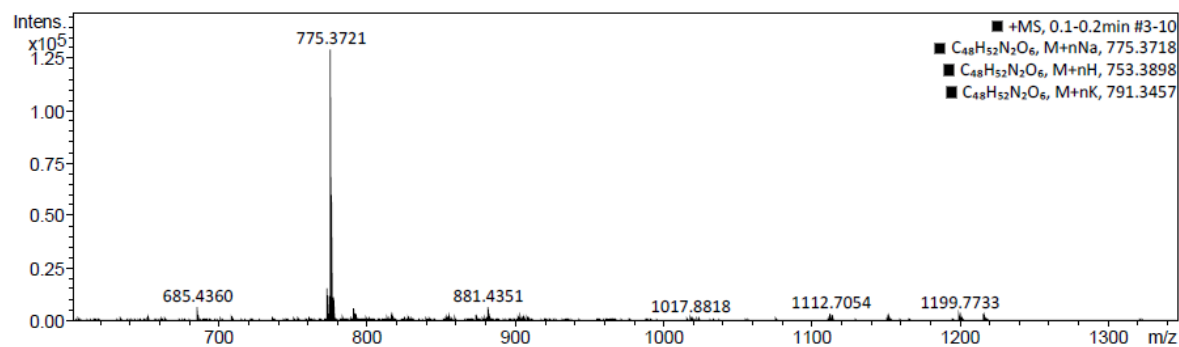

HRMS data of (+)-**24a**

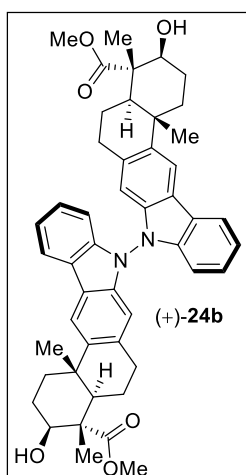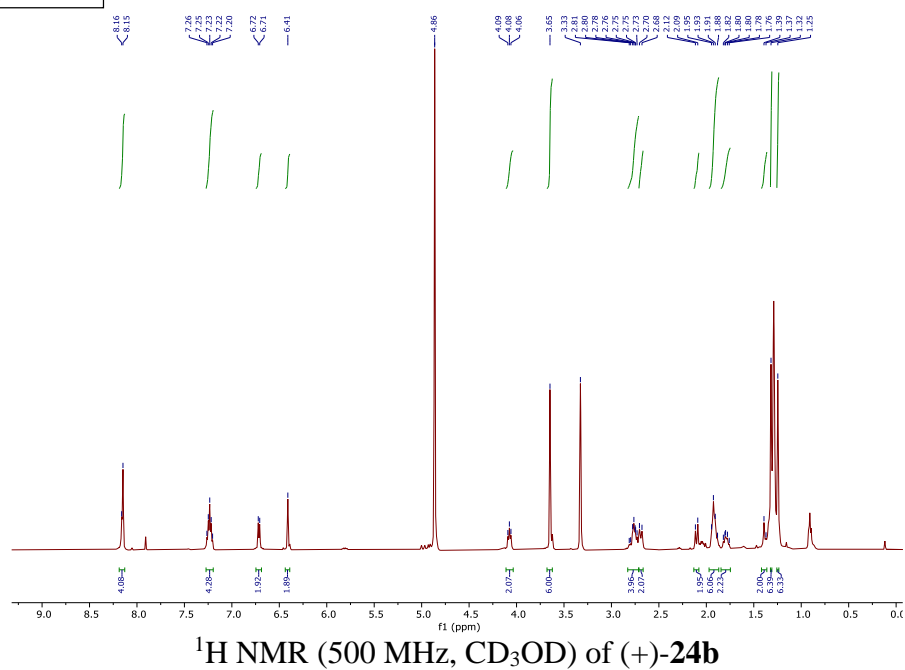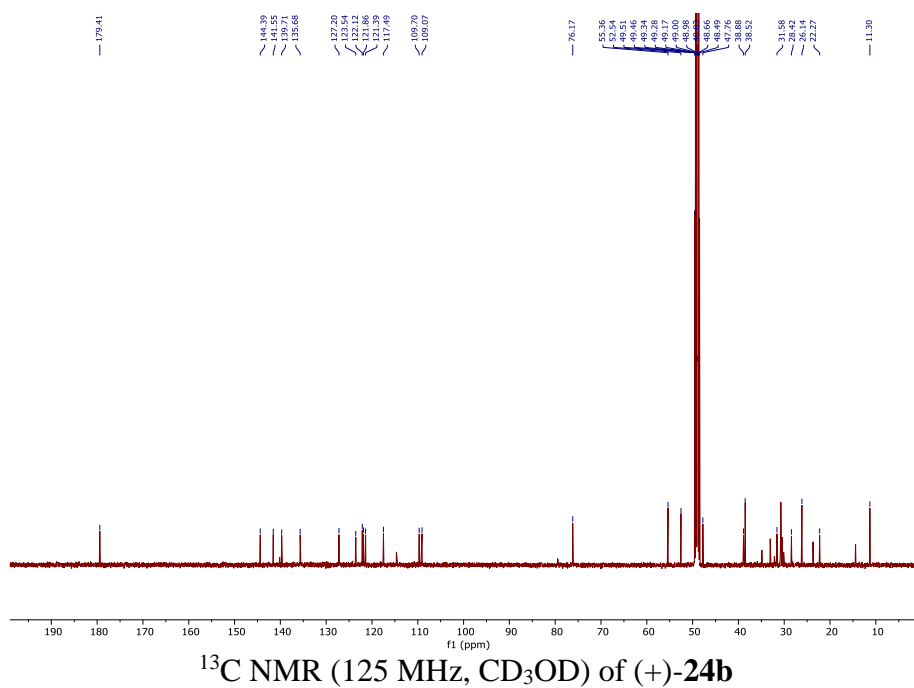



## Display Report

## Analysis Info

Analysis Name D:\Data\User data\2021\SEPTAB\_RN\_0261.d

Method Tune\_pos\_Mid.m

Sample Name AB\_RN\_0261

Comment

Acquisition Date 9/28/2021 2:19:27 PM

Operator IISER Kolkata

Instrument maXis impact 8282001.00127

## Acquisition Parameter

|             |          |                      |          |                  |           |
|-------------|----------|----------------------|----------|------------------|-----------|
| Source Type | ESI      | Ion Polarity         | Positive | Set Nebulizer    | 0.4 Bar   |
| Focus       | Active   | Set Capillary        | 3400 V   | Set Dry Heater   | 200 °C    |
| Scan Begin  | 50 m/z   | Set End Plate Offset | -500 V   | Set Dry Gas      | 4.0 l/min |
| Scan End    | 3000 m/z | Set Charging Voltage | 2000 V   | Set Divert Valve | Source    |
|             |          | Set Corona           | 0 nA     | Set APCI Heater  | 0 °C      |

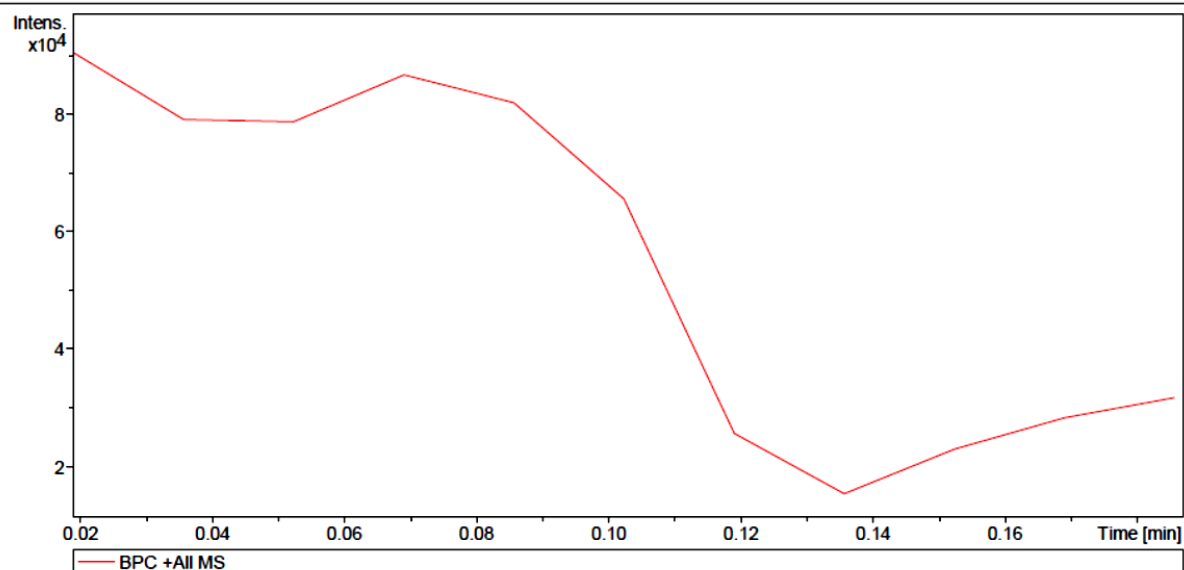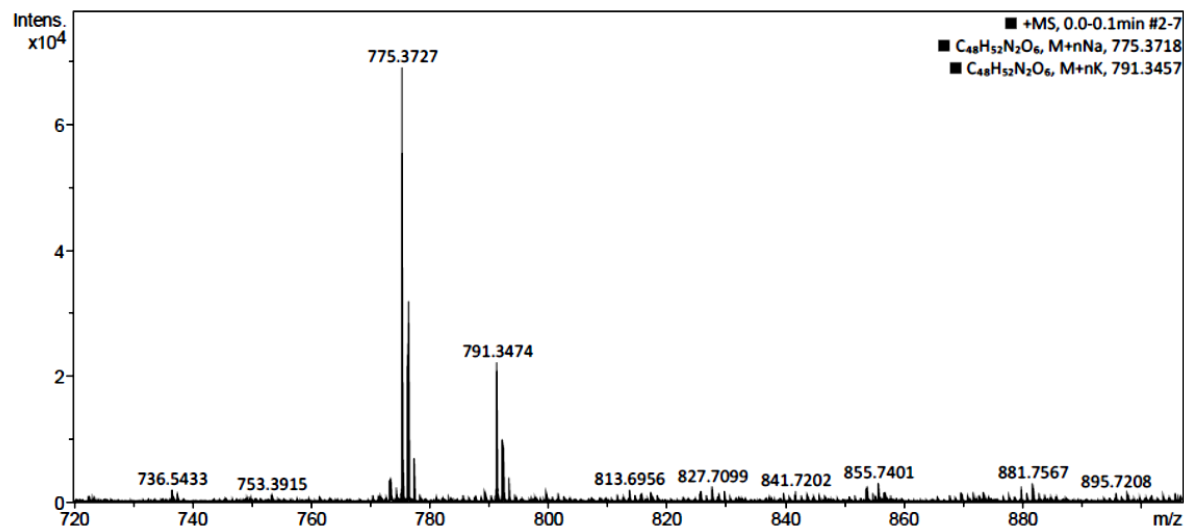

AB\_RN\_0261.d

Bruker Compass DataAnalysis 4.1

printed: 9/28/2021 2:22:08 PM

by: IISER Kolkata

Page 1 of 1

HRMS data of (+)-**24b**

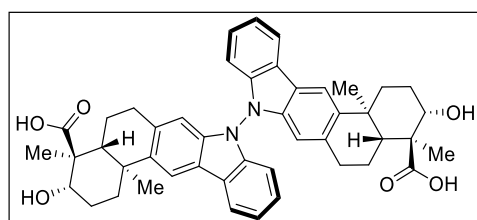

(+)-dixiamycin A [(+)-1a]

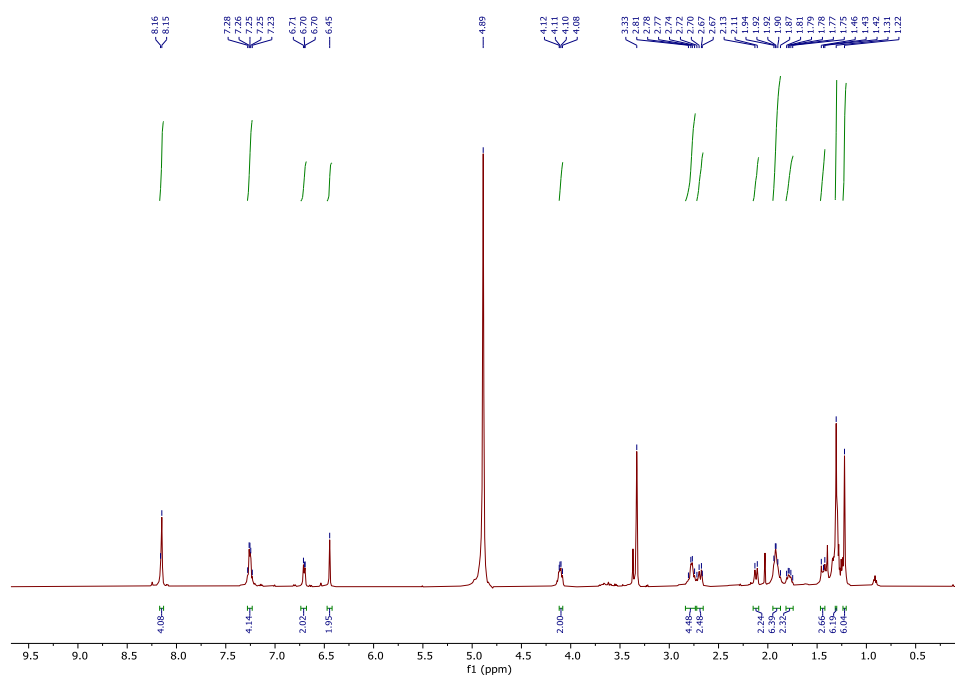<sup>1</sup>H NMR (500 MHz, CD<sub>3</sub>OD) of dixiamycin A [(+)-1a]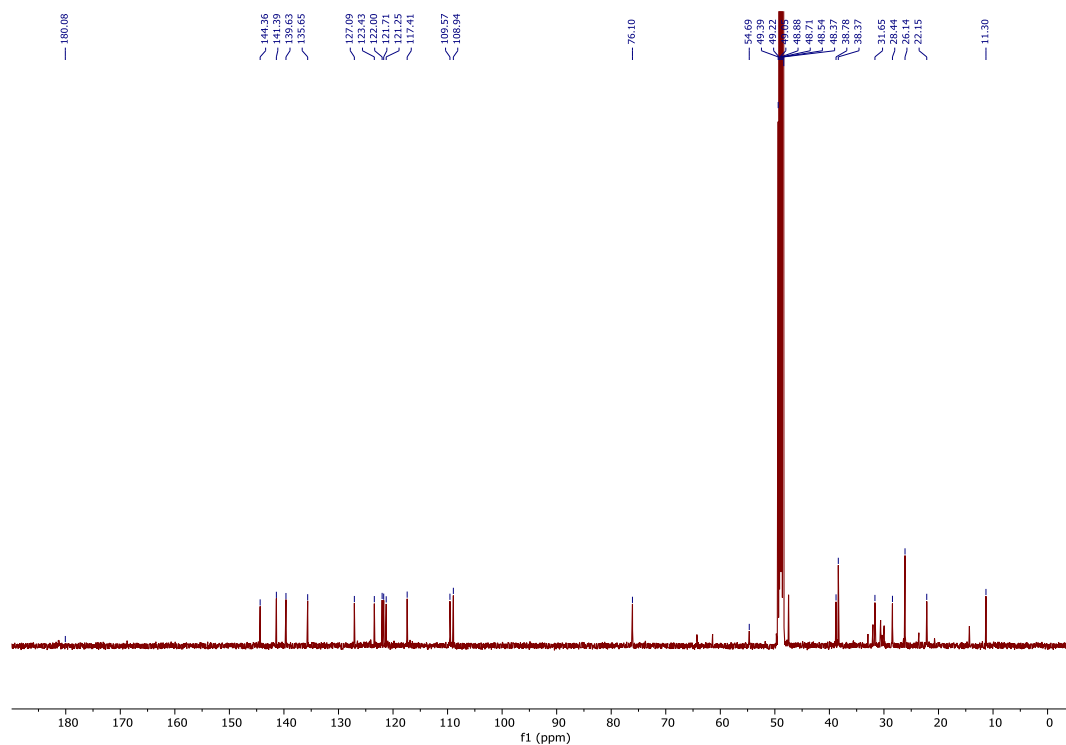<sup>13</sup>C NMR (125 MHz, CD<sub>3</sub>OD) of dixiamycin A [(+)-1a]

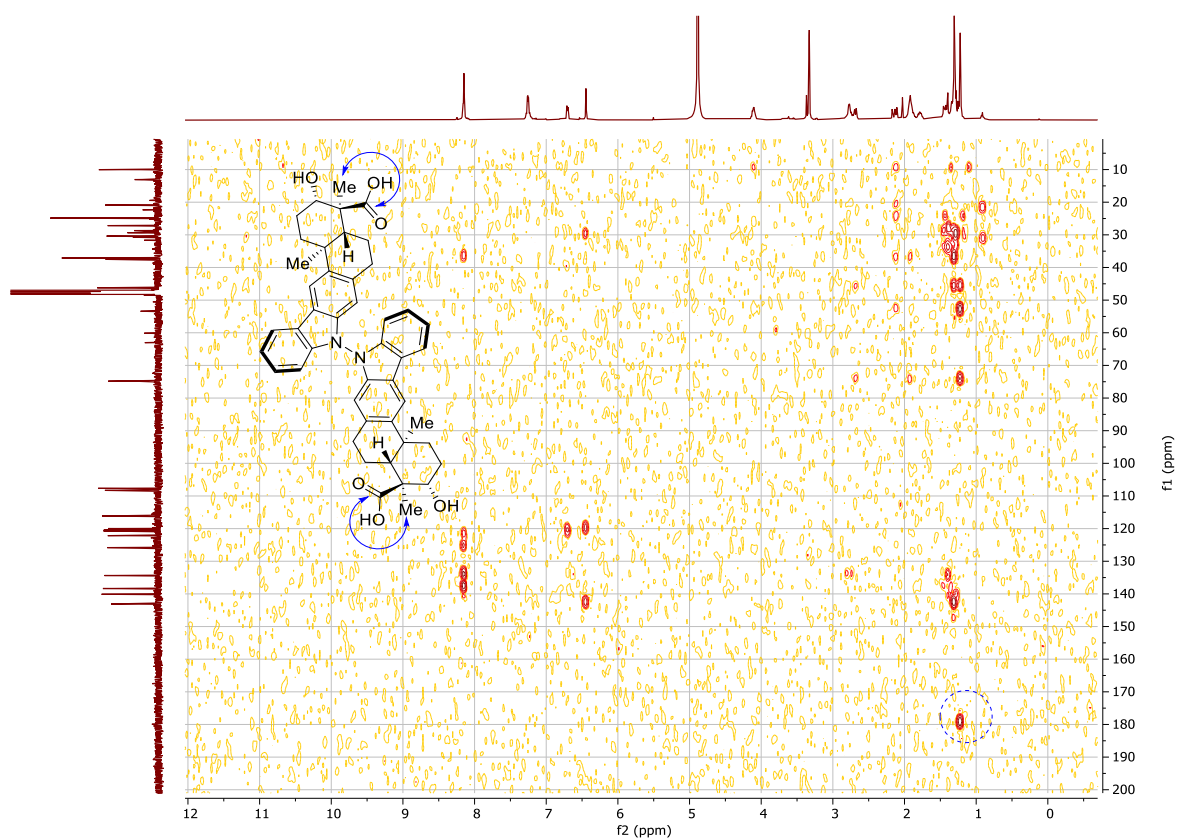

HMBC Data of dixiamycin A [(+)-1a]

## Display Report

## Analysis Info

Analysis Name D:\Data\User data\2021\OCTOBER\lab\_m\_0270.d

Method Tune\_pos\_Standard.m

Sample Name ab\_m\_0270

Comment

Acquisition Date 10/25/2021 10:49:19 AM

Operator IISER Kolkata

Instrument maXis impact 8282001.00127

## Acquisition Parameter

|             |          |                      |          |                  |           |
|-------------|----------|----------------------|----------|------------------|-----------|
| Source Type | ESI      | Ion Polarity         | Positive | Set Nebulizer    | 0.5 Bar   |
| Focus       | Active   | Set Capillary        | 3400 V   | Set Dry Heater   | 200 °C    |
| Scan Begin  | 50 m/z   | Set End Plate Offset | -500 V   | Set Dry Gas      | 4.0 l/min |
| Scan End    | 1000 m/z | Set Charging Voltage | 2000 V   | Set Divert Valve | Source    |
|             |          | Set Corona           | 0 nA     | Set APCI Heater  | 0 °C      |

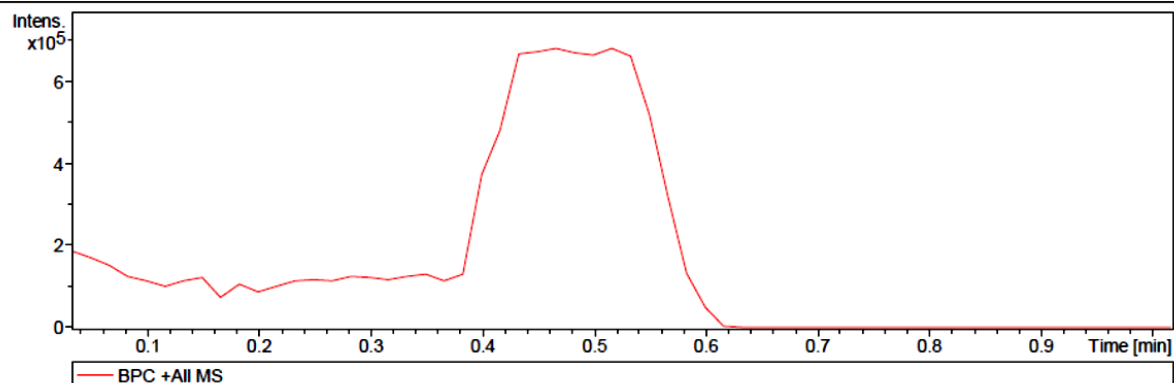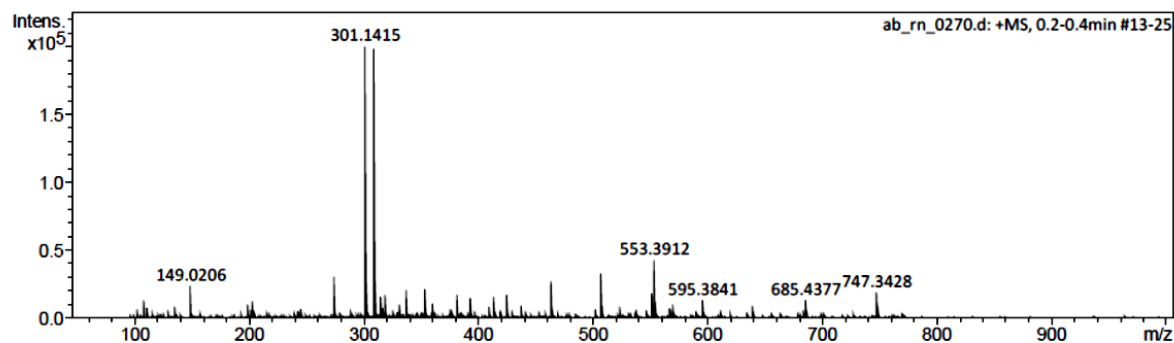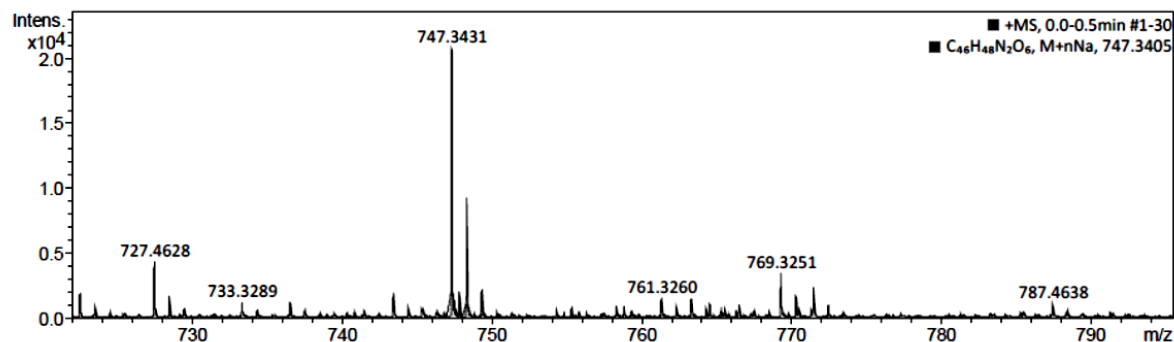

ab\_m\_0270.d

Bruker Compass DataAnalysis 4.1

printed: 7/20/2022 4:47:39 PM

by: IISER Kolkata

Page 1 of 1

HRMS data of dixiamycin A [(+)-**1a**]

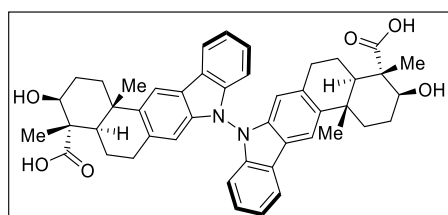

(+)-dixiamycin B [(+)-1b]

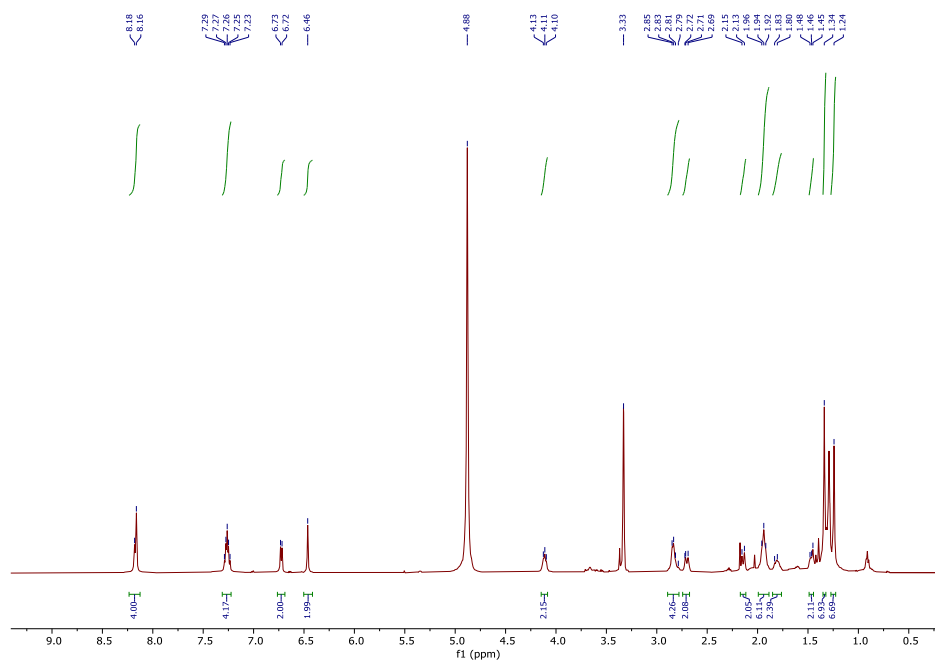<sup>1</sup>H NMR (500 MHz, CD<sub>3</sub>OD) of dixiamycin B [(+)-1b]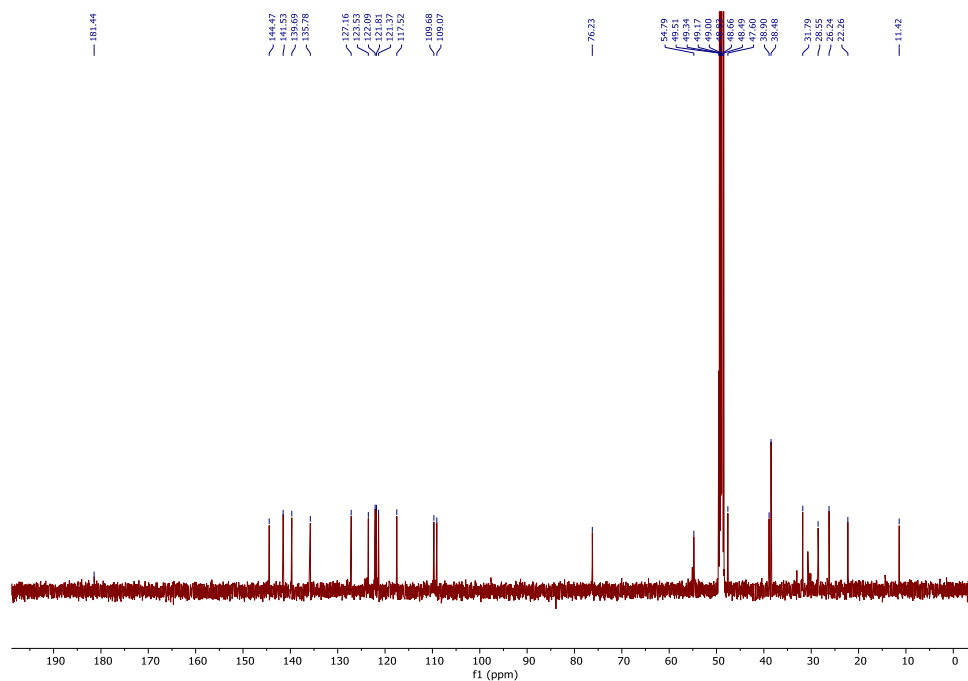<sup>13</sup>C NMR (125 MHz, CD<sub>3</sub>OD) of dixiamycin B [(+)-1b]

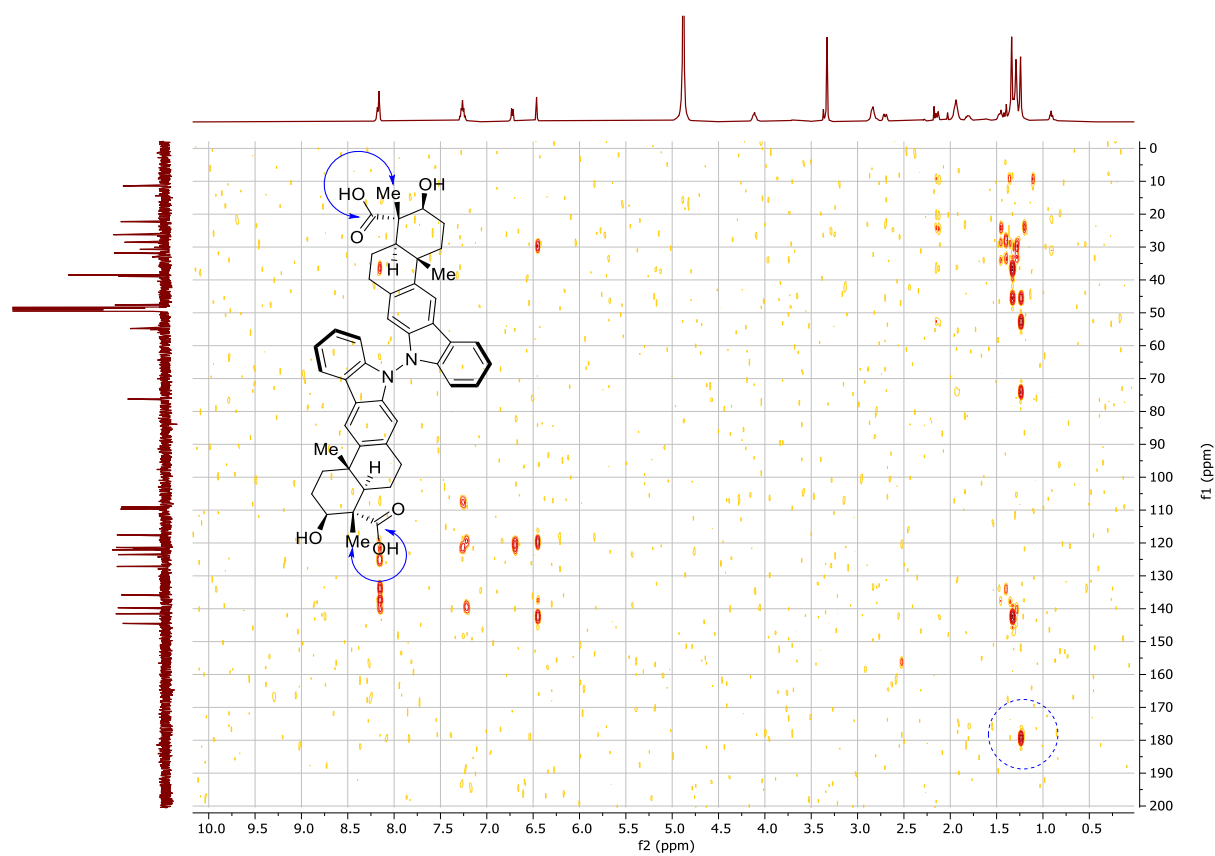

HMBC data of dixiamycin B [(+)-1b]

## Display Report

**Analysis Info**

Analysis Name D:\Data\User data\2021\NOV\AB\_RN\_0286.d  
 Method Tune\_pos\_Standard.m  
 Sample Name AB\_RN\_0286  
 Comment

Acquisition Date 11/1/2021 1:18:46 PM

Operator IISER Kolkata  
 Instrument maXis impact 8282001.00127

**Acquisition Parameter**

|             |          |                      |          |                  |           |
|-------------|----------|----------------------|----------|------------------|-----------|
| Source Type | ESI      | Ion Polarity         | Positive | Set Nebulizer    | 0.5 Bar   |
| Focus       | Active   | Set Capillary        | 3400 V   | Set Dry Heater   | 200 °C    |
| Scan Begin  | 50 m/z   | Set End Plate Offset | -500 V   | Set Dry Gas      | 4.0 l/min |
| Scan End    | 1000 m/z | Set Charging Voltage | 2000 V   | Set Divert Valve | Source    |
|             |          | Set Corona           | 0 nA     | Set APCI Heater  | 0 °C      |

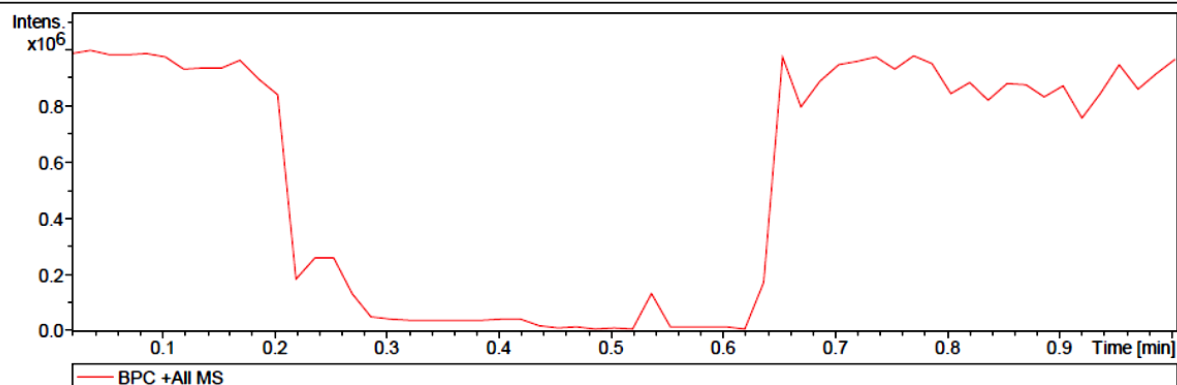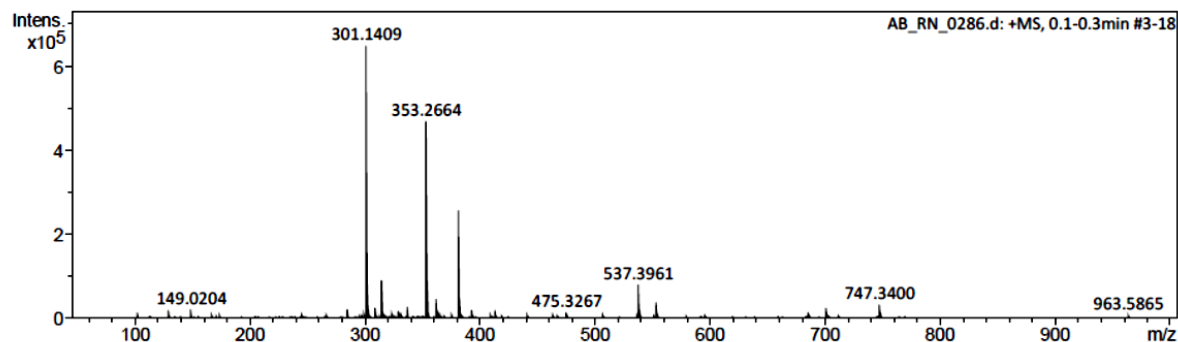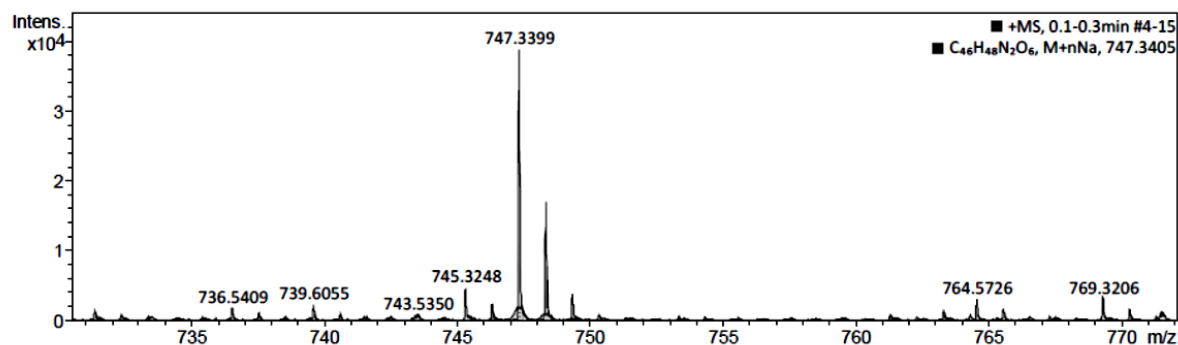

AB\_RN\_0286.d

Bruker Compass DataAnalysis 4.1

printed: 7/20/2022 4:50:20 PM

by: IISER Kolkata

Page 1 of 1

HRMS data of dixiamycin B [(+)-**1b**]

**Crystal Data and Structure Refinement of (+)-16 (CCDC 2218312):**

A colorless block  $0.22 \times 0.18 \times 0.12$  mm in size was mounted on a Cryoloop with Paratone oil. Data were collected in a nitrogen gas stream at 100.15 K using omega scans. Crystal-to-detector distance was 43.92 mm and exposure time was 0.50 seconds per frame at low angles and 2.00 seconds at high angles, using a scan width of  $0.5^\circ$ . The  $2\theta$  range for data collection  $^\circ$  7.252 to 136.454. A total of 14987 reflections were collected covering the indices  $-5 \leq h \leq 7$ ,  $-15 \leq k \leq 15$ ,  $-37 \leq l \leq 36$ . 4258 reflections were founded to be symmetry independent, with an  $R_{\text{int}}$  of 0.0298. Indexing and unit cell refinement indicated a primitive, orthorhombic lattice. The space group was found to be  $P2_12_12_1$ . CrysAlis<sup>Pro</sup> 1.171.41.115a (Rigaku Oxford Diffraction, 2021) Empirical absorption correction using spherical harmonics, implemented in SCALE3 ABSPACK scaling algorithm. Solution by intrinsic phasing (SHELXT-2018/2) produced a heavy-atom phasing model consistent with the proposed structure. All non-hydrogen atoms were refined anisotropically by least-squares (SHELXL-2018/3). All hydrogen atoms were placed using a riding model. Their positions were constrained relative to their parent atom using the appropriate HFIX command in SHELXL-2018/3.

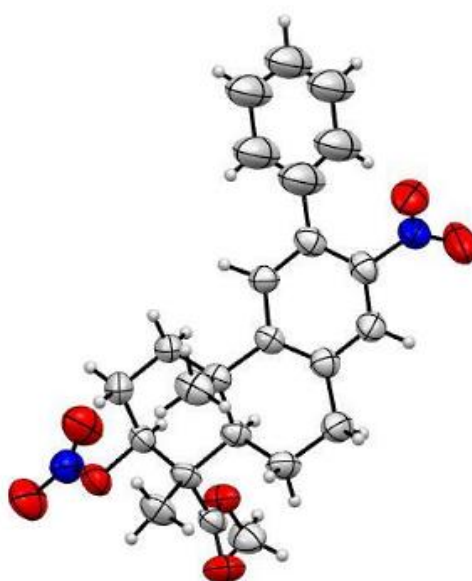

**Figure S1.** Single crystal XRD structure of compound (+)-16. ORTEP drawn at 50% probability level.

**Table 1 Crystal data and structure refinement for (+)-16 (CCDC 2218312).**

|                     |                                                               |
|---------------------|---------------------------------------------------------------|
| Identification code | rn202                                                         |
| Empirical formula   | C <sub>26</sub> H <sub>27</sub> N <sub>2</sub> O <sub>9</sub> |
| Formula weight      | 511.49                                                        |
| Temperature/K       | 100.15                                                        |



|                                             |                                                               |
|---------------------------------------------|---------------------------------------------------------------|
| Crystal system                              | orthorhombic                                                  |
| Space group                                 | P2 <sub>1</sub> 2 <sub>1</sub> 2 <sub>1</sub>                 |
| a/Å                                         | 6.08080(10)                                                   |
| b/Å                                         | 13.2575(2)                                                    |
| c/Å                                         | 31.0012(5)                                                    |
| $\alpha$ /°                                 | 90                                                            |
| $\beta$ /°                                  | 90                                                            |
| $\gamma$ /°                                 | 90                                                            |
| Volume/Å <sup>3</sup>                       | 2499.20(7)                                                    |
| Z                                           | 4                                                             |
| $\rho_{\text{calc}}$ /g/cm <sup>3</sup>     | 1.359                                                         |
| $\mu$ /mm <sup>-1</sup>                     | 0.870                                                         |
| F(000)                                      | 1076.0                                                        |
| Crystal size/mm <sup>3</sup>                | 0.22 × 0.18 × 0.12                                            |
| Radiation                                   | CuK $\alpha$ ( $\lambda$ = 1.54184)                           |
| 2 $\Theta$ range for data collection/°      | 7.252 to 136.454                                              |
| Index ranges                                | -5 ≤ h ≤ 7, -15 ≤ k ≤ 15, -37 ≤ l ≤ 36                        |
| Reflections collected                       | 14987                                                         |
| Independent reflections                     | 4258 [R <sub>int</sub> = 0.0298, R <sub>sigma</sub> = 0.0276] |
| Data/restraints/parameters                  | 4258/0/309                                                    |
| Goodness-of-fit on F <sup>2</sup>           | 1.042                                                         |
| Final R indexes [I >= 2 $\sigma$ (I)]       | R <sub>1</sub> = 0.0748, wR <sub>2</sub> = 0.2050             |
| Final R indexes [all data]                  | R <sub>1</sub> = 0.0861, wR <sub>2</sub> = 0.2139             |
| Largest diff. peak/hole / e Å <sup>-3</sup> | 0.78/-0.34                                                    |
| Flack parameter                             | -0.33(18)                                                     |

## checkCIF/PLATON report

Structure factors have been supplied for datablock(s) rn202

THIS REPORT IS FOR GUIDANCE ONLY. IF USED AS PART OF A REVIEW  
PROCEDURE FOR PUBLICATION, IT SHOULD NOT REPLACE THE EXPERTISE OF  
AN EXPERIENCED CRYSTALLOGRAPHIC REFEREE.

No syntax errors found. CIF dictionary Interpreting this report

## Datablock: rn202

Bond precision: C-C = 0.0108 Å Wavelength=1.54184

Cell: a=6.0808(1) b=13.2575(2) c=31.0012(5)

alpha=90 beta=90 gamma=90

Temperature: 100 K

Calculated Reported

Volume 2499.20(7) 2499.20(7)

Space group P 21 21 21 P 21 21 21

Hall group P 2ac 2ab P 2ac 2ab

Moiety formula C<sub>24</sub> H<sub>26</sub> N<sub>2</sub> O<sub>7</sub>, C<sub>2</sub> H O<sub>2</sub> C<sub>24</sub> H<sub>26</sub> N<sub>2</sub> O<sub>7</sub>, C<sub>2</sub> H O<sub>2</sub>

Sum formula C<sub>26</sub> H<sub>27</sub> N<sub>2</sub> O<sub>9</sub> C<sub>26</sub> H<sub>27</sub> N<sub>2</sub> O<sub>9</sub>

Mr 511.50 511.49

Dx,g cm-3 1.359 1.359  
 Z 4 4  
 Mu (mm-1) 0.870 0.870  
 F000 1076.0 1076.0  
 F000' 1079.75  
 h,k,lmax 7,15,37 7,15,37  
 Nref 4576[ 2660] 4258  
 Tmin,Tmax 0.829,0.901 0.724,1.000  
 Tmin' 0.826  
 Correction method= # Reported T Limits: Tmin=0.724 Tmax=1.000  
 AbsCorr = EMPIRICAL  
 Data completeness= 1.60/0.93 Theta(max)= 68.227  
 R(reflections)= 0.0748( 3637)  
 wR2(reflections)=  
 0.2139( 4258)  
 S = 1.042 Npar= 309

The following ALERTS were generated. Each ALERT has the format

**test-name\_ALERT\_alert-type\_alert-level.**

Click on the hyperlinks for more details of the test.

#### Alert level B

PLAT340\_ALERT\_3\_B Low Bond Precision on C-C Bonds ..... 0.01081 Ang.  
 PLAT420\_ALERT\_2\_B D-H Bond Without Acceptor O --H . Please Check  
 PLAT780\_ALERT\_1\_B Coordinates do not Form a Properly Connected Set Please Do !

#### Alert level C

DIFMX02\_ALERT\_1\_C The maximum difference density is > 0.1\*ZMAX\*0.75  
 The relevant atom site should be identified.  
 STRVA01\_ALERT\_4\_C Flack parameter is too small  
 From the CIF: \_refine\_ls\_abs\_structure\_Flack -0.330  
 From the CIF: \_refine\_ls\_abs\_structure\_Flack\_su 0.180  
 PLAT031\_ALERT\_4\_C Refined Extinction Parameter Within Range of ... 2.800 Sigma  
 PLAT094\_ALERT\_2\_C Ratio of Maximum / Minimum Residual Density .... 2.26 Report  
 PLAT097\_ALERT\_2\_C Large Reported Max. (Positive) Residual Density 0.78 eA-3  
 PLAT241\_ALERT\_2\_C High 'MainMol' Ueq as Compared to Neighbors of C19 Check  
 PLAT242\_ALERT\_2\_C Low 'MainMol' Ueq as Compared to Neighbors of N1 Check  
 PLAT242\_ALERT\_2\_C Low 'MainMol' Ueq as Compared to Neighbors of C16 Check  
 PLAT243\_ALERT\_4\_C High 'Solvent' Ueq as Compared to Neighbors of C26 Check  
 PLAT244\_ALERT\_4\_C Low 'Solvent' Ueq as Compared to Neighbors of C25 Check  
 PLAT260\_ALERT\_2\_C Large Average Ueq of Residue Including O 0.211 Check  
 PLAT906\_ALERT\_3\_C Large K Value in the Analysis of Variance ..... 2.597 Check  
 PLAT911\_ALERT\_3\_C Missing FCF Refl Between Thmin & STh/L= 0.600 6 Report

#### Alert level G

PLAT004\_ALERT\_5\_G Polymeric Structure Found with Maximum Dimension 1 Info  
 PLAT007\_ALERT\_5\_G Number of Unrefined Donor-H Atoms ..... 1 Report  
 PLAT171\_ALERT\_4\_G The CIF-Embedded .res File Contains EADP Records 1 Report  
 PLAT231\_ALERT\_4\_G Hirshfeld Test (Solvent) O --C26\_a . 5.7 s.u.  
 PLAT231\_ALERT\_4\_G Hirshfeld Test (Solvent) O8 --C25 . 21.4 s.u.  
 PLAT231\_ALERT\_4\_G Hirshfeld Test (Solvent) O8 --C26 . 8.5 s.u.  
 PLAT231\_ALERT\_4\_G Hirshfeld Test (Solvent) O8 --C26\_a . 8.8 s.u.  
 PLAT231\_ALERT\_4\_G Hirshfeld Test (Solvent) C25 --C26 . 5.0 s.u.  
 PLAT344\_ALERT\_2\_G Unusual Angle Range in Solvent/Ion for C26 Check  
 PLAT367\_ALERT\_2\_G Long? C(sp?)-C(sp?) Bond C25 - C26 . 1.66 Ang.  
 PLAT773\_ALERT\_2\_G Check long C-C Bond in CIF: C25 --C26 2.04 Ang.  
 PLAT779\_ALERT\_4\_G Suspect or Irrelevant (Bond) Angle(s) in CIF ... 38.90 Deg.  
 O8 -C26 -C25 1\_555 1\_555 ..... # 124 Check  
 PLAT779\_ALERT\_4\_G Suspect or Irrelevant (Bond) Angle(s) in CIF ... 32.60 Deg.  
 O8 -C26 -C25 4\_546 1\_555 4\_546 ..... # 126 Check  
 PLAT910\_ALERT\_3\_G Missing # of FCF Reflection(s) Below Theta(Min). 1 Note  
 PLAT912\_ALERT\_4\_G Missing # of FCF Reflections Above STh/L= 0.600 15 Note  
 PLAT933\_ALERT\_2\_G Number of HKL-OMIT Records in Embedded .res File 4 Note  
 PLAT978\_ALERT\_2\_G Number C-C Bonds with Positive Residual Density. 3 Info

0 **ALERT level A** = Most likely a serious problem - resolve or explain  
 3 **ALERT level B** = A potentially serious problem, consider carefully  
 13 **ALERT level C** = Check. Ensure it is not caused by an omission or oversight  
 17 **ALERT level G** = General information/check it is not something unexpected  
 2 ALERT type 1 CIF construction/syntax error, inconsistent or missing data  
 12 ALERT type 2 Indicator that the structure model may be wrong or deficient  
 4 ALERT type 3 Indicator that the structure quality may be low  
 13 ALERT type 4 Improvement, methodology, query or suggestion  
 2 ALERT type 5 Informative message, check

It is advisable to attempt to resolve as many as possible of the alerts in all categories. Often the minor alerts point to easily fixed oversights, errors and omissions in your CIF or refinement strategy, so attention to these fine details can be worthwhile. In order to resolve some of the more serious problems it may be necessary to carry out additional measurements or structure refinements. However, the purpose of your study may justify the reported deviations and the more serious of these should normally be commented upon in the discussion or experimental section of a paper or in the "special\_details" fields of the CIF. checkCIF was carefully designed to identify outliers and unusual parameters, but every test has its limitations and alerts that are not important in a particular case may appear. Conversely, the absence of alerts does not guarantee there are no aspects of the results needing attention. It is up to the individual to critically assess their own results and, if necessary, seek expert advice.

### **Publication of your CIF in IUCr journals**

A basic structural check has been run on your CIF. These basic checks will be run on all CIFs submitted for publication in IUCr journals (*Acta Crystallographica*, *Journal of Applied Crystallography*, *Journal of Synchrotron Radiation*); however, if you intend to submit to *Acta Crystallographica Section C* or *E* or *IUCrData*, you should make sure that full publication checks are run on the final version of your CIF prior to submission.

### **Publication of your CIF in other journals**

Please refer to the *Notes for Authors* of the relevant journal for any special instructions relating to CIF submission.

**PLATON version of 12/09/2022; check.def file version of 09/08/2022**

Datablock rn202 - ellipsoid plot

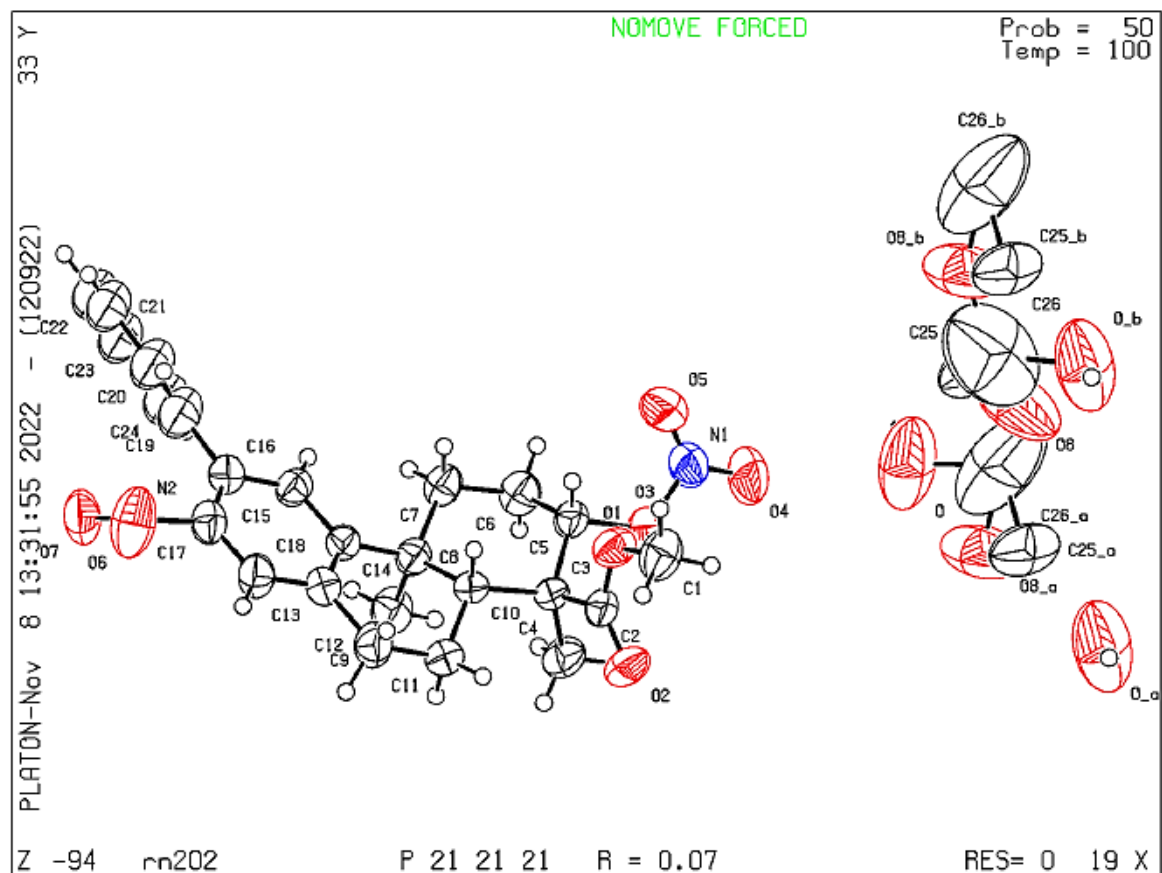

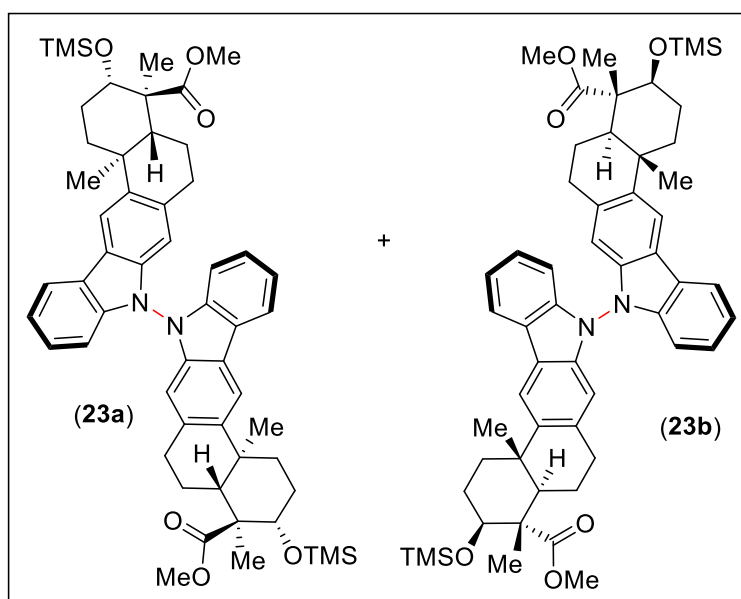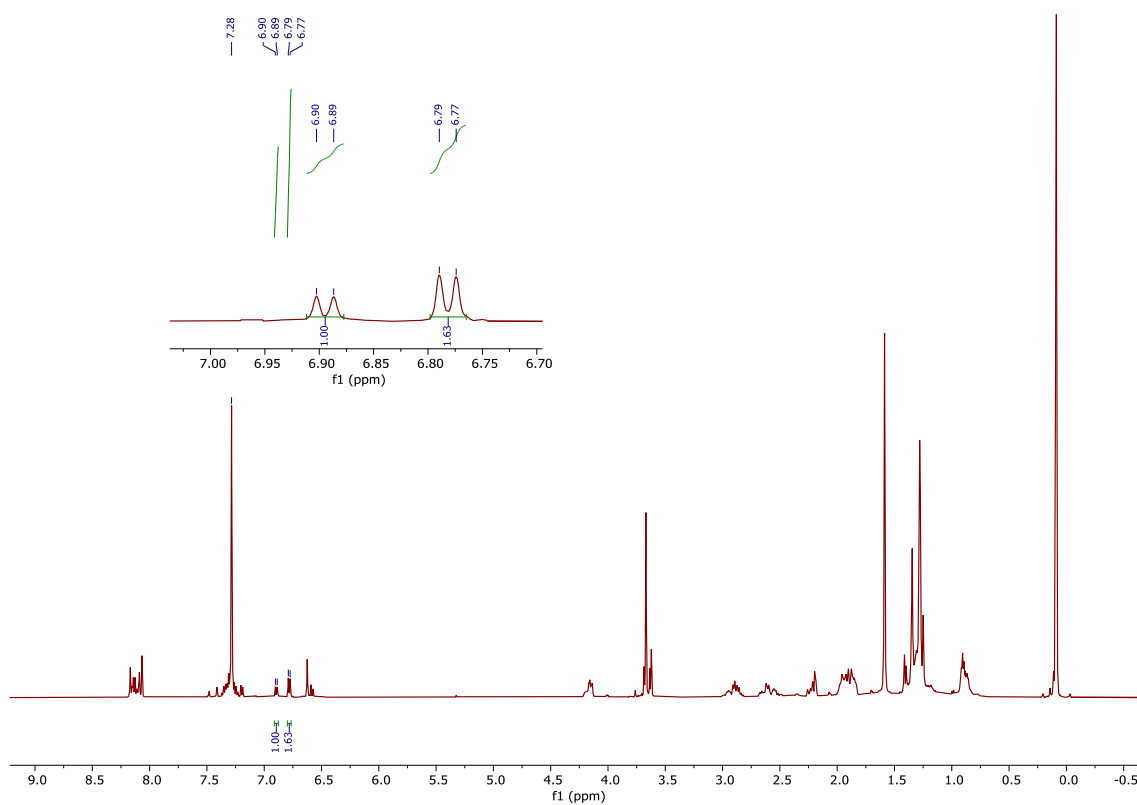

$^1\text{H}$  NMR (500 MHz,  $\text{CDCl}_3$ ) of reaction mixture of **23a** and **23b**

Atropo-diastereomeric ratio: **23a**: **23b** = ~1.6:1

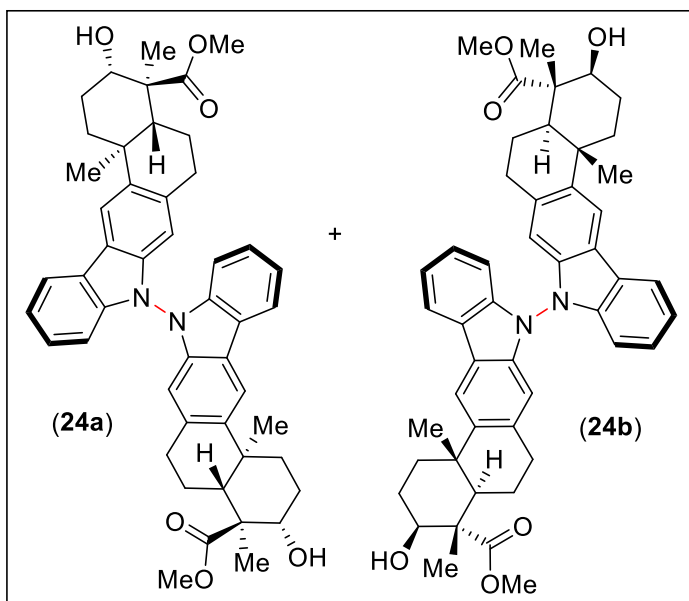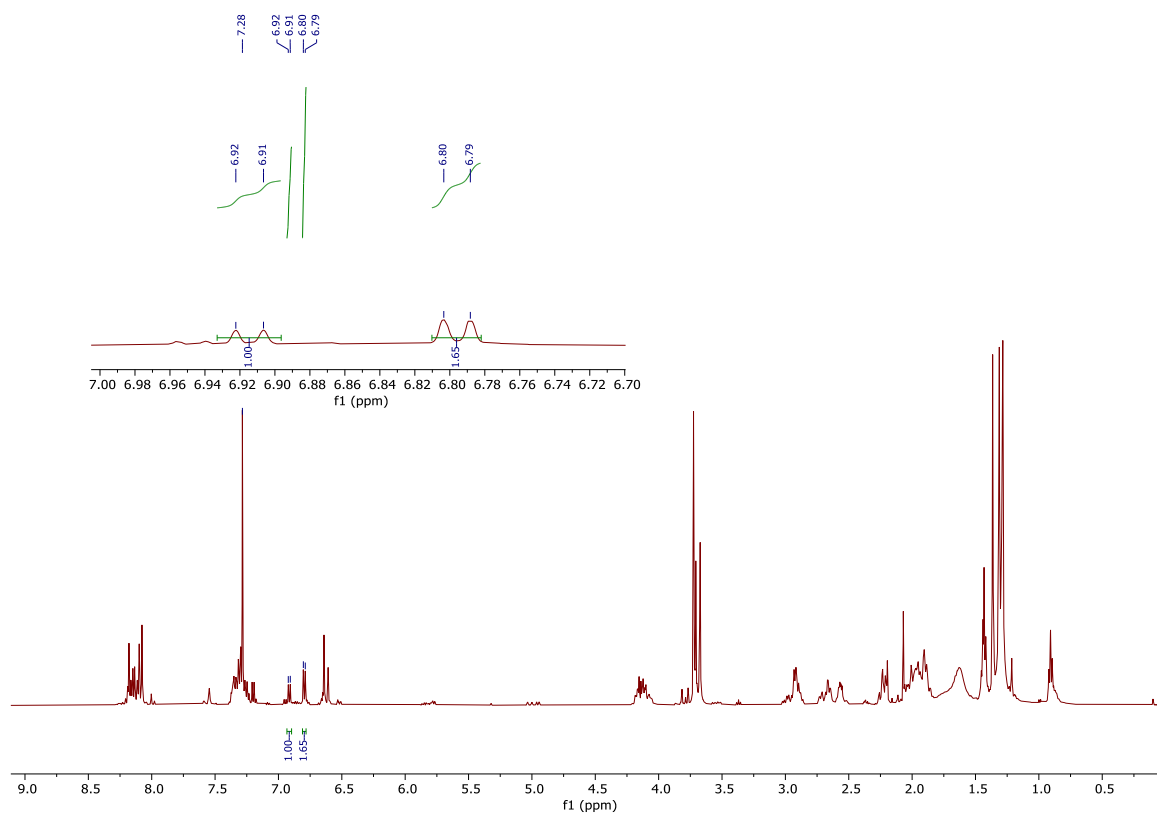

<sup>1</sup>H NMR (500 MHz, CDCl<sub>3</sub>) of reaction mixture of **24a** and **24b**

Atropo-diastereomeric ratio: **24a**: **24b** = ~1.6:1

Retention time of dixiamycin A (**1a**) was determined via a reverse phase HPLC analysis using a Spherisorb ODS-2 C18 5 $\mu$ m column;

Solvent: Acetonitrile/Methanol = 90/10; Flow rate: 0.50 mL/min; Detection: at 295.0 nm:

$t_R$  of dixiamycin A (**1a**) = 8.891 min.

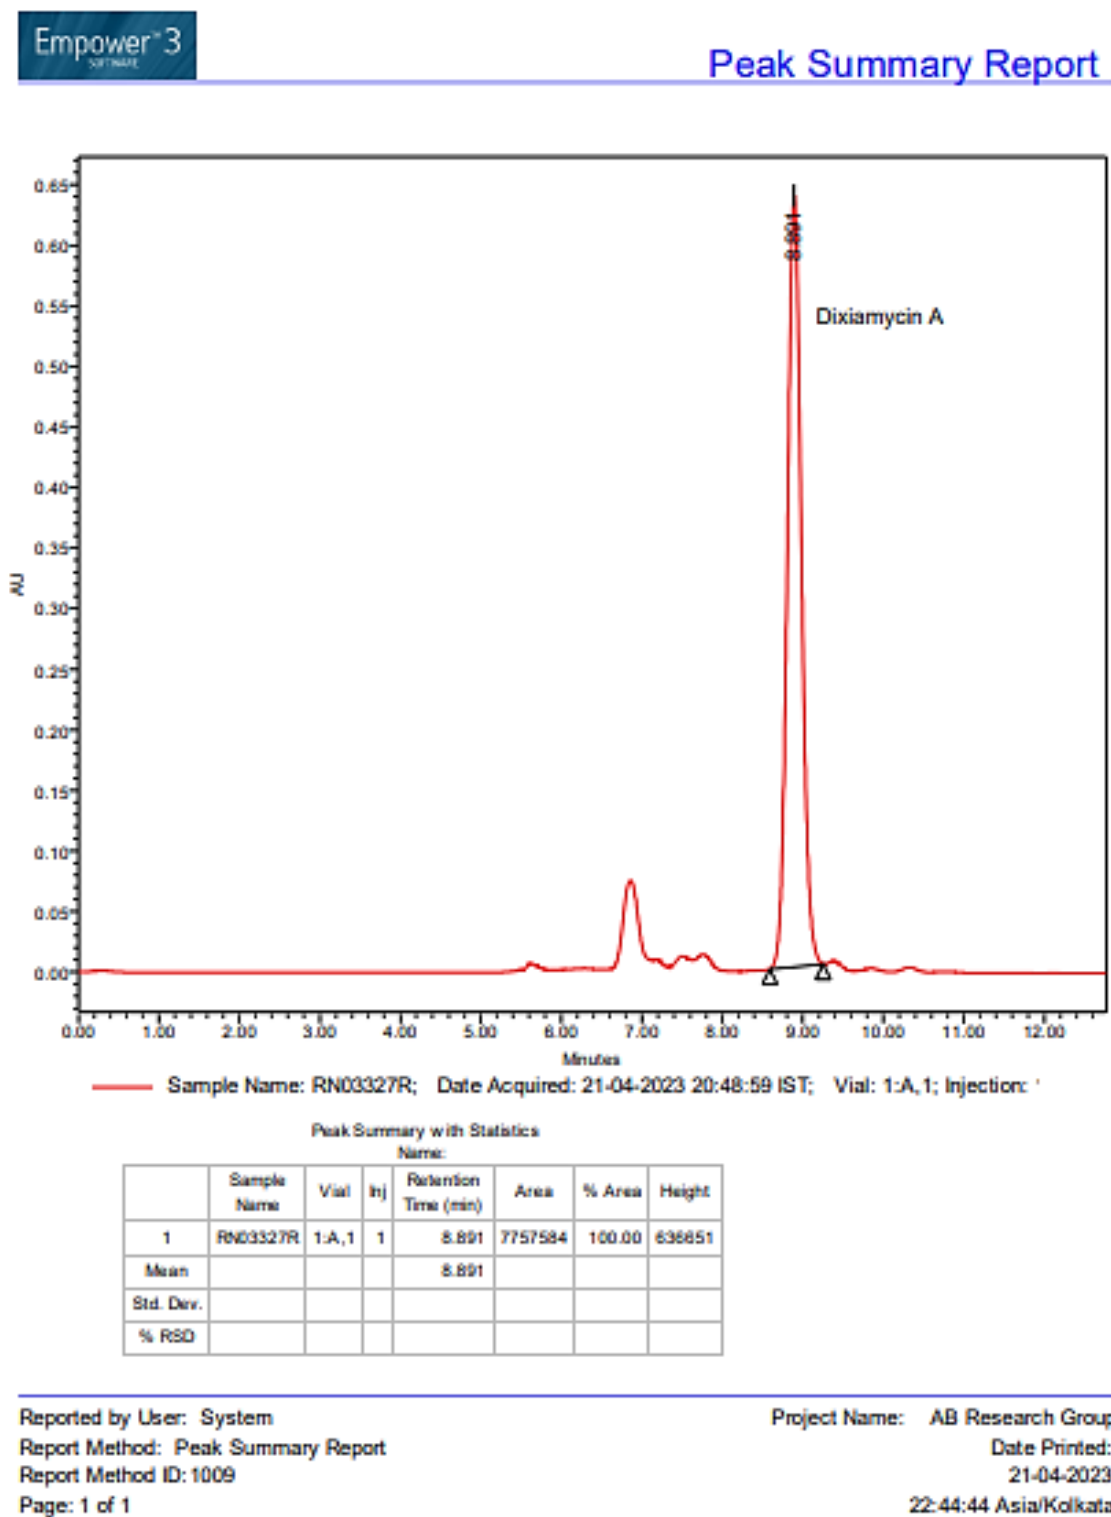

HPLC traces of dixiamycin A (**1a**)

Retention time of dixiamycin B (**1b**) was determined via a reverse phase HPLC analysis using a Spherisorb ODS-2 C18 5 $\mu$ m column;

Solvent: Acetonitrile/Methanol = 90/10; Flow rate: 0.50 mL/min; Detection: at 295.0 nm

$t_R$  of dixiamycin B (**1b**) = 9.905 min.

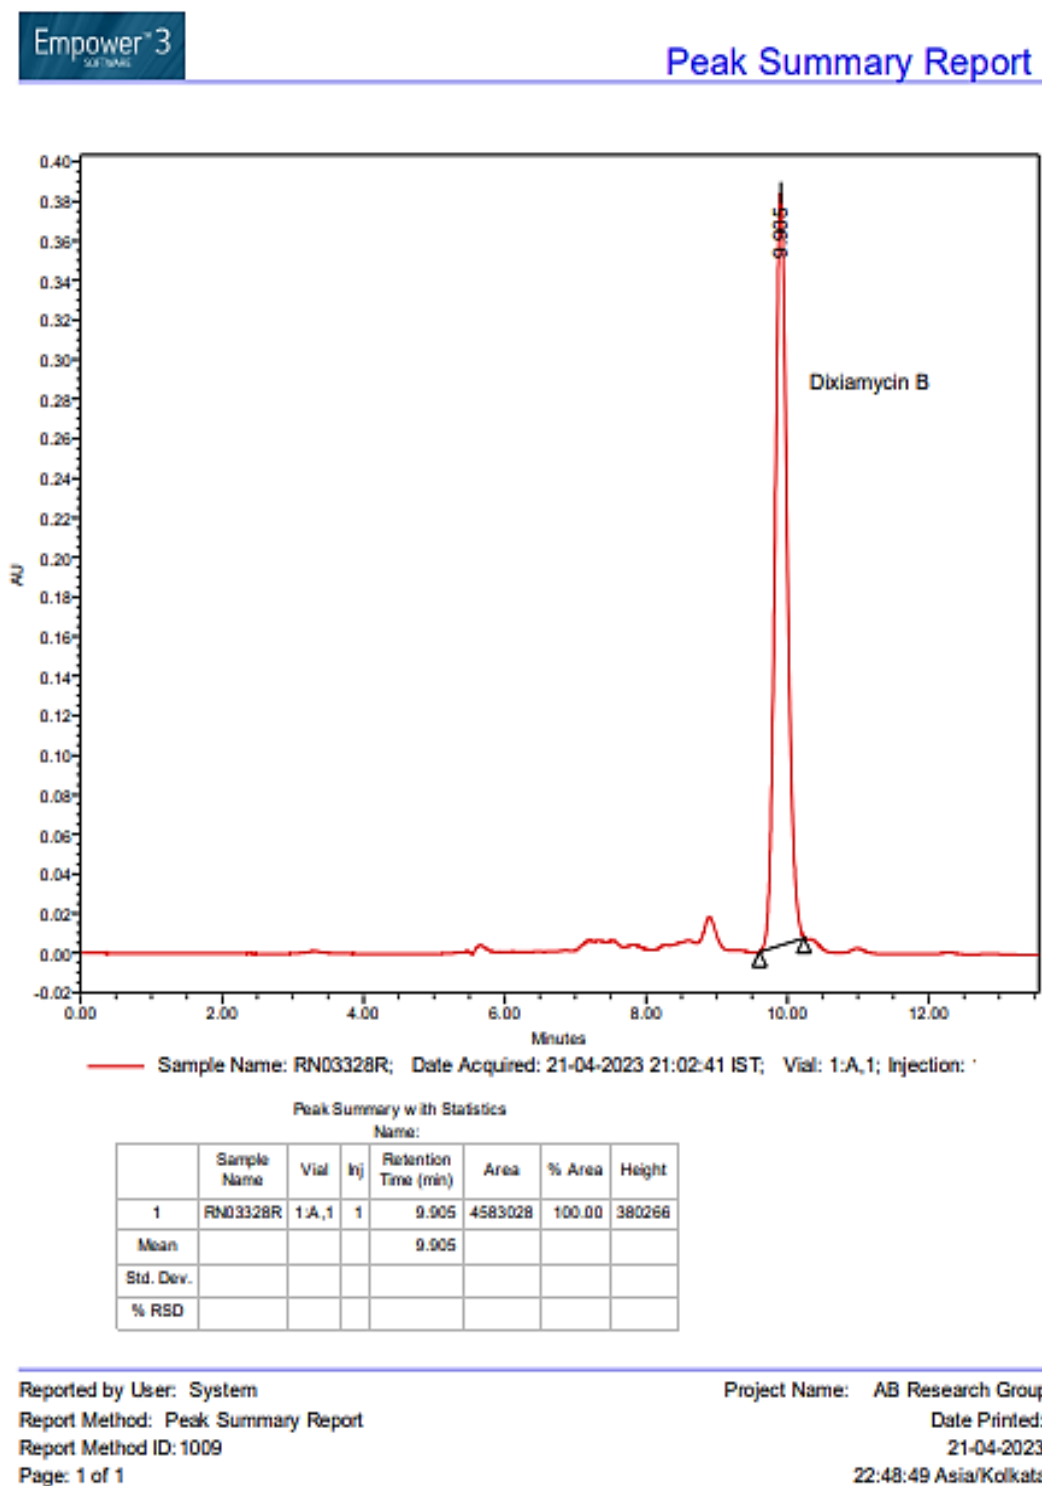

HPLC traces of dixiamycin B (**1b**)



Retention time of atropo-diastereomeric ratio of dixiamycin A (**1a**) and dixiamycin B (**1b**) were determined via reverse phase HPLC analysis using a Spherisorb ODS-2 C18 5 $\mu$ m column;

Solvent: Acetonitrile/Methanol = 90/10; Flow rate: 0.50 mL/min; Detection: at 295.0 nm

$t_R$  of dixiamycin A (**1a**) = 8.756 min and  $t_R$  of dixiamycin B (**1b**) = 9.799 min

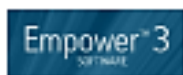

## Peak Summary Report

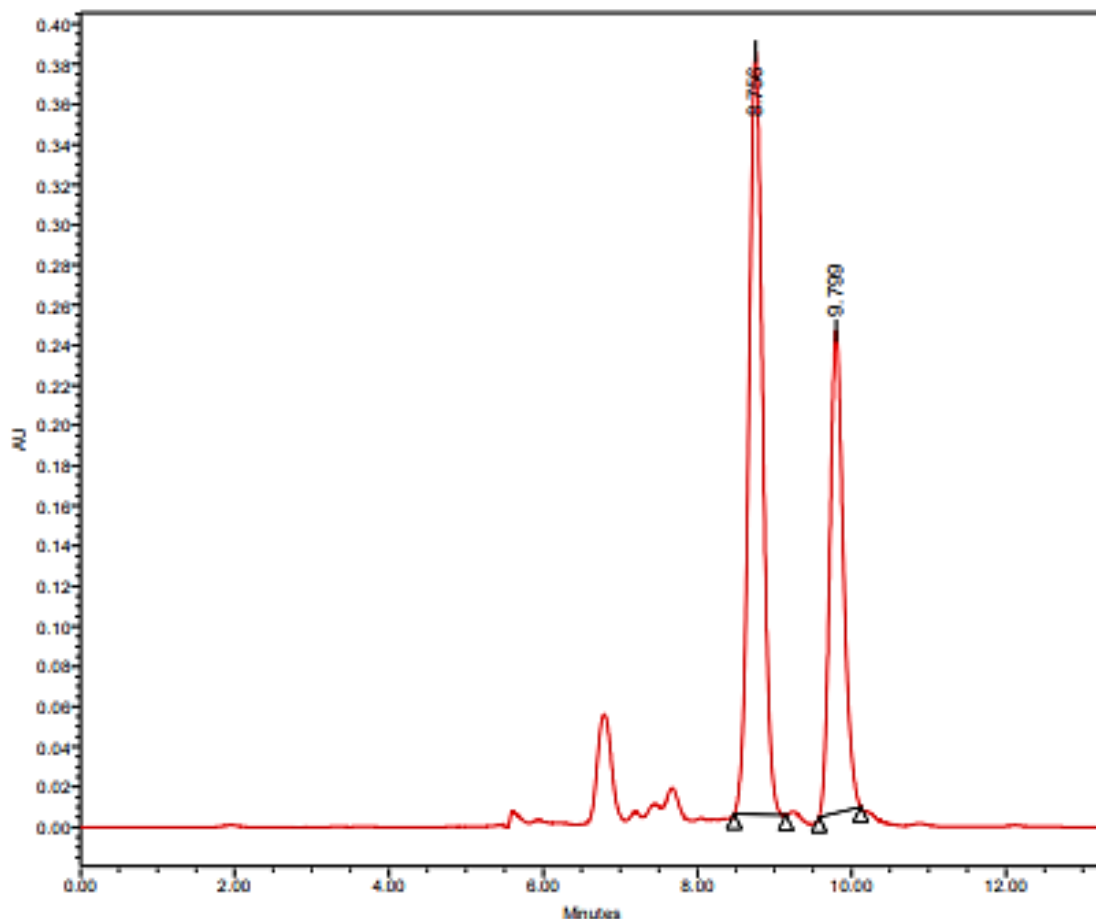

— Sample Name: RN03334R1; Date Acquired: 22-04-2023 16:29:25 IST; Vial: 1:A,1; Injection: 1

Peak Summary with Statistics  
Name:

|           | Sample Name | Vial  | Inj | Retention Time (min) | Area    | % Area | Height |
|-----------|-------------|-------|-----|----------------------|---------|--------|--------|
| 1         | RN03334R1   | 1:A,1 | 1   | 9.799                | 2913549 | 38.25  | 239990 |
| 2         | RN03334R1   | 1:A,1 | 1   | 8.756                | 4704128 | 61.75  | 379949 |
| Mean      |             |       |     | 9.277                |         |        |        |
| Std. Dev. |             |       |     | 0.738                |         |        |        |

Reported by User: System  
Report Method: Peak Summary Report  
Report Method ID: 1009  
Page: 1 of 2

Project Name: AB Research Group  
Date Printed: 22-04-2023  
16:44:36 Asia/Kolkata

HPLC traces of dixiamycin A (**1a**) and dixiamycin B (**1b**)

Retention time of xiamycin A (**2a**) was determined via reverse phase HPLC analysis using a Spherisorb ODS-2 C18 5 $\mu$ m column;

Solvent: Acetonitrile/Methanol = 90/10; Flow rate: 0.50 mL/min; Detection: at 295 nm:

$t_R$  of xiamycin A (**2a**) = 6.215 min.

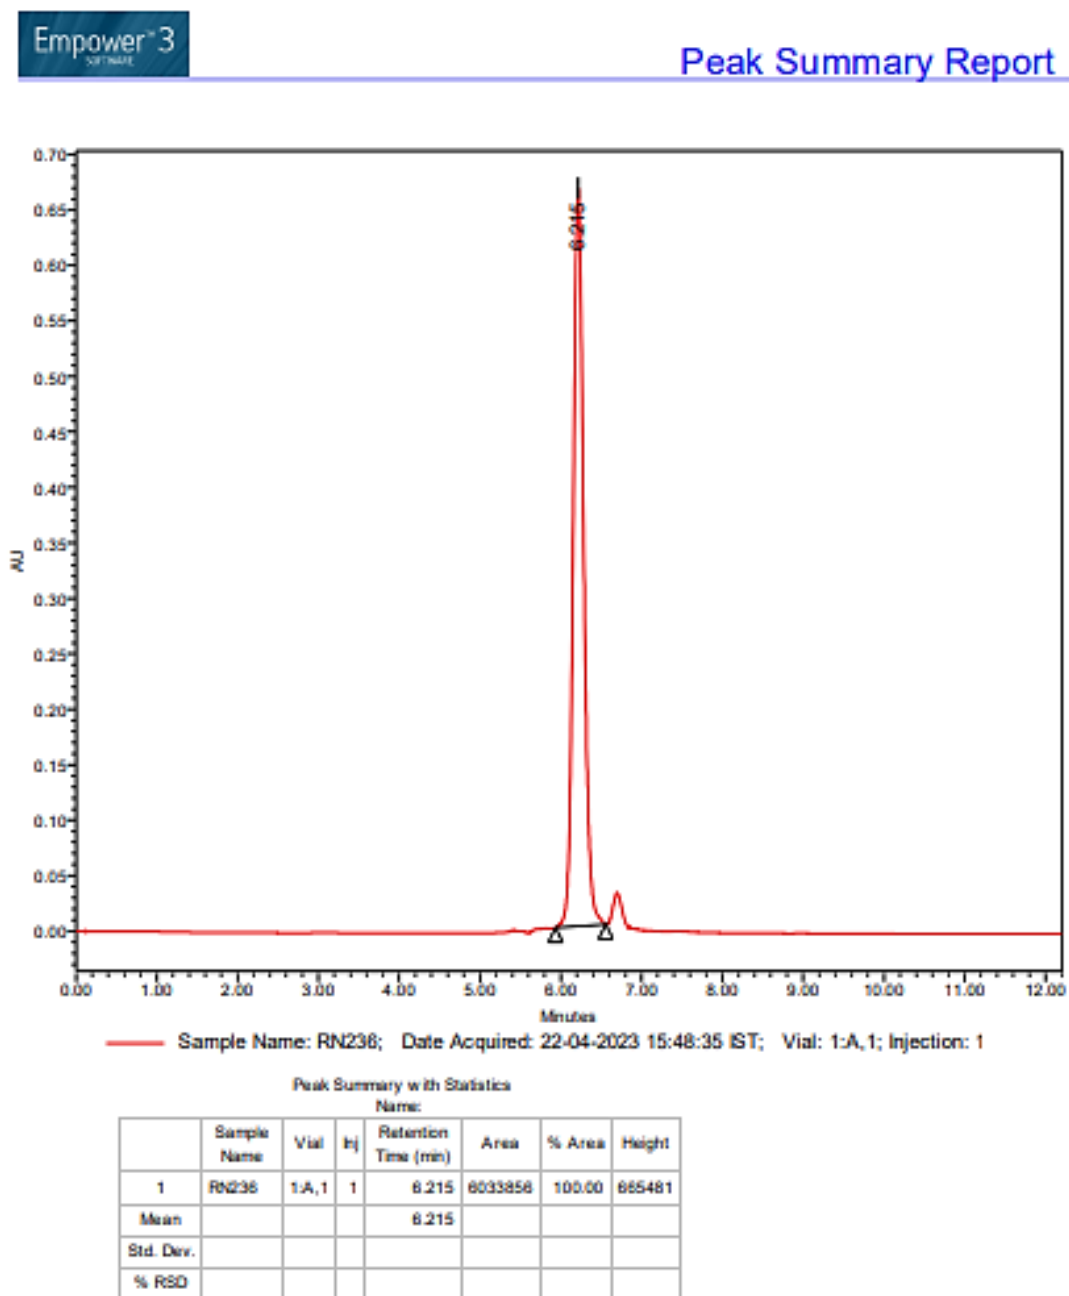

Reported by User: System  
 Report Method: Peak Summary Report  
 Report Method ID: 1009  
 Page: 1 of 1

Project Name: AB Research Group  
 Date Printed: 22-04-2023  
 16:04:04 Asia/Kolkata

HPLC traces of xiamycin A (**2a**)

Comparison of the retention time of xiamycin A (**2a**), dixiamycin A (**1a**) and dixiamycin B (**1b**) were determined via reverse phase HPLC analysis using a Spherisorb ODS-2 C18 5 $\mu$ m column;

Solvent: Acetonitrile/Methanol = 90/10; Flow rate: 0.50 mL/min; Detection: at 295.0 nm.

$t_R$  of xiamycin A (**2a**) = 6.265 min,

$t_R$  of dixiamycin A (**1a**) = 8.793 min

$t_R$  of dixiamycin B (**1b**) = 9.841 min.

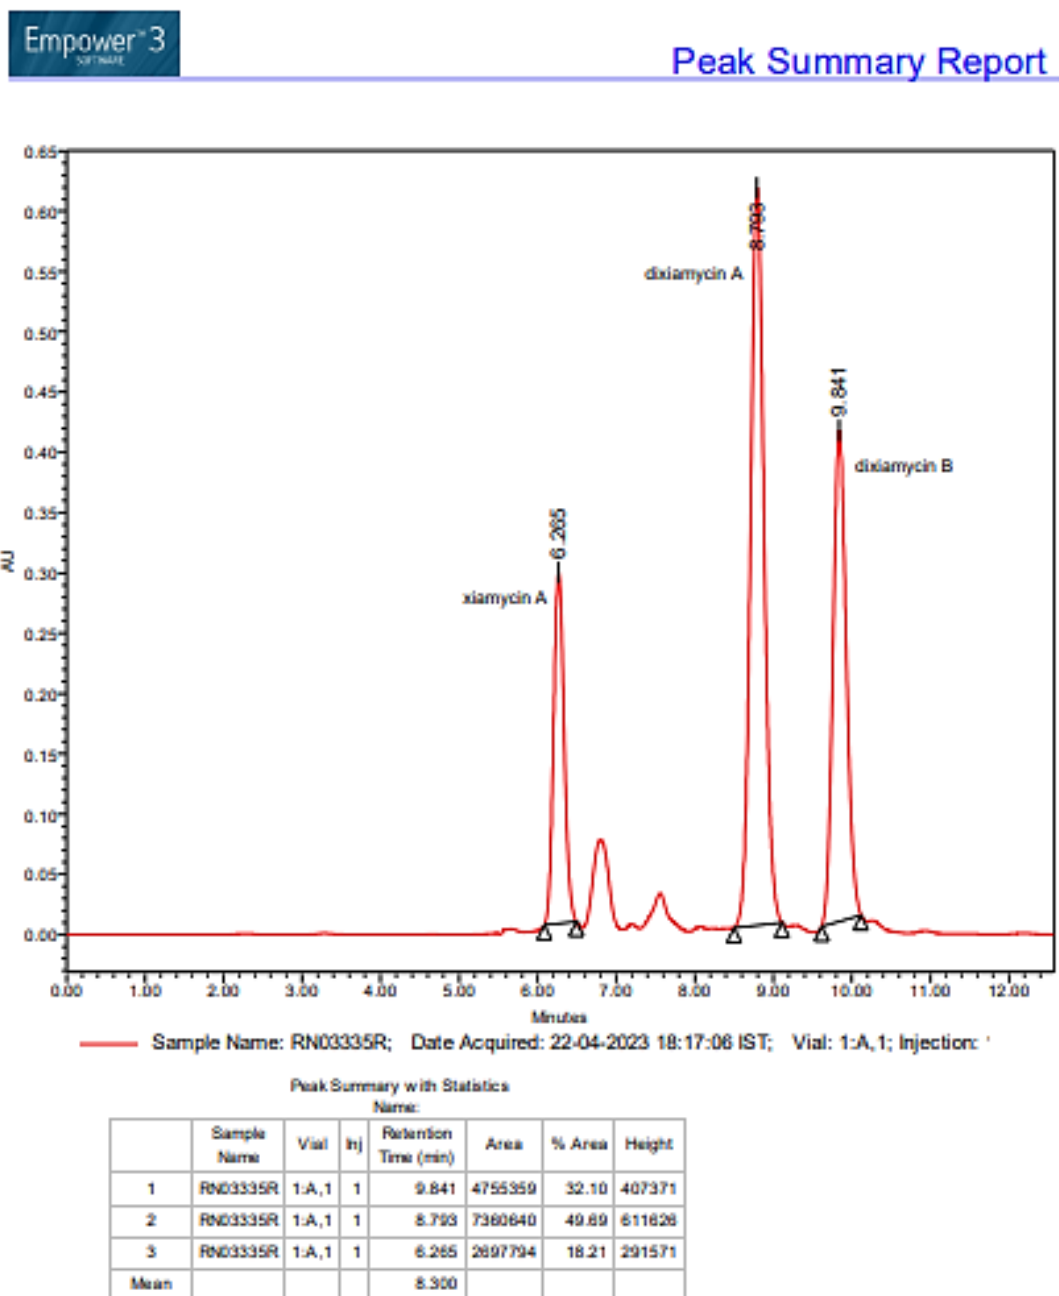

Reported by User: System  
Report Method: Peak Summary Report  
Report Method ID: 1009  
Page: 1 of 2

Project Name: AB Research Group  
Date Printed: 22-04-2023  
18:31:49 Asia/Kolkata

HPLC traces of xiamycin A (**2a**), dixiamycin A (**1a**) and dixiamycin B (**1b**)

**References:**

1. R. Lekphrom, S. Kanokmedhakul, and K. Kanokmedhakul, *Planta Med.*, 2010, **76**, 726.
2. X. Li, and R. G. Carter, *Org. Lett.*, 2018, **20**, 5546.
3. L. Ding, J. Munch, H. Goerls, A. Maier, H. Fiebig, W. Lin, and C. Hertweck, *Bioorg. Med. Chem. Lett.*, 2010, **15**, 6685.
4. B. Rosen, E. Werner, A. OBrian, and P. Baran, *J. Am. Chem. Soc.*, 2014, **136**, 5571.
5. M. Pfaffenbach, I. Bakanas, N. R. O Connor, J. L. Herrick, and R. Sarpong, *Angew. Chem. Int. Ed.*, 2019, **58**, 15304.
6. Q. Zhang, A. Mándi, S. Li, Y. Chen, W. Zhang, X. Tian, H. Zhang, H. Li, W. Zhang, S. Zhang, J. Ju, and T. Kurtán, Zhang, C. *Eur. J. Org. Chem.*, 2012, 5256.
7. E. Jin, H. Li, Z. Liu, F. Xiao, and W. Li, *J. Nat. Prod.*, 2021, **84**, 2606.
8. Z. Xu, M. Baunach, L. Ding, and C. Hertweck, *Angew. Chem., Int. Ed.*, 2012, **51**, 10293.
